# Supplementary material
Source: PubMed Central journal article supplement (PMC3138265)
Supplement: supp_M111.249151_jbc.M111.249151-1.pdf [file supp_M111.249151_jbc.M111.249151-1.pdf]

## SUPPLEMENTAL INFORMATION

### VWF sequences

Human (*Homo sapiens*) VWF cDNA sequence was compiled from GenBank entries M10321.1 (1), M17588.1 (2) and X04385.1 (3). This full length cDNA sequence is the same as that of refseq NM\_000552.3 except for a few known single nucleotide polymorphisms.

Human VWF gene sequence was based on AH005287.1, a segmented set of 38 entries M25828.1 through M25865.1 that covers all 52 exons (4), and M60675.1, which contains the sequence of a 21.3 kb gene fragment spanning exons 23-34 (5). The human VWF pseudogene sequence is M60676.1, which comprises a 21 kb pseudogene on chromosome 22 that corresponds to exons 23-34 of the VWF gene on chromosome 12 (5).

White-tufted-ear marmoset (*Callithrix jacchus*) VWF cDNA sequence is predicted refseq XM\_002752243.1. Chimpanzee (*Pan troglodytes*) VWF cDNA sequence is predicted refseq XM\_508945.2. Mouse (*Mus musculus*) VWF cDNA sequence is refseq NM\_011708.3. Giant panda (*Ailuropoda melanoleuca*) VWF cDNA sequence is predicted refseq XM\_002930091.1.

VWF cDNA sequences for 25 species were assembled *de novo* from genomic sequences. Nucleotide sequence data reported for 23 species are available in the Third Party Annotation Section of the DDBJ/EMBL/GenBank databases under the accession numbers TPA: BK007980-BK008005. VWF cDNA sequences for western lowland gorilla (*Gorilla gorilla*) and bottlenosed dolphin (*Tursiops truncatus*) are appended below.

New VWF gene and cDNA sequences were identified by using human VWF genomic DNA, cDNA and protein sequences for iterative BLASTN and TBLASTN (NCBI version 2.2.24) searches of GenBank sequences including genome assemblies, high throughput genome sequences (htgs), genome survey sequences (gss), whole genome shotgun sequences (wgss), non-redundant nucleotide sequences, expressed sequence tags (ESTs), trace archives and short read archives. Exons and splice sites were identified based on sequence similarity using the programs SeqMan Pro, MegAlign, and EditSeq (version 8.1.5, DNASTAR, Inc., Madison, WI) and assembled into cDNA sequences. In some cases splice site prediction with the program SplicePort (version 1) (6) was used to support the identification of exon 2, which encodes a cleaved signal peptide. Remaining gaps were assigned lengths based on the conserved length of the corresponding exons for VWF from other species.

Rhesus monkey (*Macaca mulatta*) VWF cDNA sequence BK007989 is similar to predicted refseq XM\_002807974.1, except that XM\_002807974.1 lacks complete sequence for exon 28. BK007989 was derived from wgss AANU01190199.1 (exons 1-3), AANU01190200.1 (exons 4-5), AANU01190202.1 (exon 6), AANU01190205.1 (exons 7-18), AANU01190206.1 (exons 19-20), AANU01190207.1 (exons 21-28), AANU01190208.1 (exons 28-42), AANU01190209.1 (exons 43-47), and AANU01190210.1 (exons 48-52). Gaps and errors in exon 28 were corrected from traces TI490421287, TI852218215, and TI358561899.

Dog (*Canis lupus familiaris*) VWF cDNA sequence BK007981 is similar to predicted NM\_001002932.1, except that parts of NM\_001002932.1 are inconsistent with other cDNA entries or genomic traces for exons 7, 11, and 42. BK007981 was derived from wgss AAEX02011162.1.

Cattle (*Bos taurus*) VWF cDNA sequence BK007980 is derived from wgss AAFC03120372.1 (exons 1-3), AAFC03120374.1 (exons 6-7), and AAFC03028507.1 (exons 11-52). Gaps in this assembly were filled from traces TI419342196, TI515279818, TI425321040, TI589958794, and TI594837491. Exons

and splice sites were identified by comparison to cDNA sequences AW354654.1, BF777006.1, EE333226.1, BI535247.1, AW352873.1, BE749548.1, BM288253.1, AW658424.1, CK955532.1, and CK774294.1.

Pig (*Sus scrofa*) VWF cDNA sequence BK007995 is derived from htgs AC163958.2 and FP102760.2, which do not cover exons 1-5. These exons were obtained from cDNA sequences BP459041.1 and DT327670.1. Exons and splice sites were identified by comparison to cDNA sequences BE030430.1, BE236207.1, BM485003.1, BF442911.1, BF443270.1, BI346678.1, and BF703224.1.

Horse (*Equus caballus*) VWF cDNA sequence BK007985 is derived from wgss AAWR02029170.1 (exons 1-15), AAWR02029169.1 (exon 16), and AAWR02029168.1 (exons 18-52). Exon 17 was provided by trace TI1472575032.

Rat (*Rattus norvegicus*) VWF cDNA sequence BK007994 is similar to predicted refseq XM\_342759.1, except that XM\_342759.1 lacks exons 1 and 5. BK007994 is derived from wgss AAHX01032881.1 (exons 1-37), AAHX01032882.1 (exons 38-47), AAHX01032883.1 (exons 48-52). The majority of the sequence was confirmed and splice sites were identified by alignment with cDNAs FM070253.1, CB547010.1, CB736674.1, U50044.1, AJ224673.1, CB545392.1, CB610389.1, CB581251.1, CB703030.1, CF113897.1, and BI298314.1.

Rabbit (*Oryctolagus cuniculus*) VWF cDNA sequence BK007991 is derived from wgss AAGW02051559.1 (exons 1-5), AAGW02051558.1 (exons 6-20), AAGW02051557.1 (exons 21-38), AAGW02051556.1 (exons 39-43), and AAGW02051555.1 (exons 44-52). Errors at the 5' end of exon 34 were corrected from trace TI855913069. A frameshift in exon 28 was corrected from TI651097624. The splice site between exons 43-44 was identified by comparison to cDNA EC620075.1.

Chicken (*Gallus gallus*) VWF cDNA sequence BK007988 is derived from wgss AADN02065137.1 (exons 1-15), AADN02065136.1 (exons 16-21), AADN02065135.1 (exons 22-30), AADN02065133.1 (exons 31-34), and AADN02065132.1 (exons 35-52). Identification of exons 1-4, 14-17, 25-28, 29-31, and 38-52 is supported by comparison to cDNAs BU323363.1, BU462510.1, BU331027.1, BU309203.1, BQ037193.2, BM485548.1, AI979961.1, BM426048.1, BX258791.1, BM488796.1, and BX258790.1.

Zebra finch (*Taeniopygia guttata*) VWF cDNA sequence BK007997 is derived from wgss ABQF01036128.1 (exons 1-27), ABQF01036130.1 (exons 28-30), and ABQF01036131.1 (exons 31-52). The 5' end of exon 28 was completed from trace TI1261325877. The sequence is similar to predicted refseq XM\_002188179.1, except that exons 2, 23, 24 and 28 in XM\_002188179.1 required correction based on alignments with corresponding chicken, anole, human and frog sequences.

Western clawed frog (*Xenopus tropicalis*) VWF cDNA sequence BK007996 is derived from wgss AAMC01011472.1 (exon 2), AAMC01011474.1 (exons 3-6), AAMC01011475.1 (exons 7-32), AAMC01011476.1 (exons 33-40), AAMC01011477.1 (exons 41-42), AAMC01011478.1 (exons 43-44), and AAMC01011479.1 (exons 45-52). Splice sites for exons 28-34 and exons 40-52 were identified by comparison to ESTs DR835756.1, DN007177.1, DN080731.1, EG653390.1, EL715901.1, DN083600.1, and EL715900.1. BK007996 is similar to predicted refseq XM\_002932296.1 except that XM\_002932296.1 has errors in exons 2 and 33.

Sumatran orangutan (*Pongo abelii*) VWF cDNA sequence BK007993 is derived from wgss ABGA01401196.1 (exons 1-3), ABGA01275753.1 (exons 1-3), ABGA01268156.1 (exons 4-5), ABGA01268154.1 (exon 6), ABGA01063082.1 (exons 7-15), ABGA01063080.1 (exons 16-18), ABGA01063078.1 (exons 19-20), ABGA01063077.1 (exons 21-34), ABGA01171174.1 (exons 35-37), ABGA01324188.1 (exons 38), ABGA01171175.1 (exons 39-40), ABGA01171176.1 (exons 41-42),

ABGA01013475.1 (exons 43), ABGA01013476.1 (exons 44-47), and ABGA01090113.1 (exons 48-52). A frameshift in exon 14 was corrected from trace TI897102100.

African elephant (*Loxodonta africana*) VWF cDNA sequences BK008002 (exons 1-17) and BK008003 (exons 18-52) are derived from wgss AAGU03036114.1 (exons 1-16), AAGU03036113.1 (exons 18-47), and AAGU03036112.1 (exons 48-52). Exon 17 was provided by trace TI1744370414. The gap between BK008002 and BK008003 corresponds to approximately 46 nucleotides at the 5' end of exon 18.

Domestic cat (*Felis catus*) VWF cDNA sequence BK007986 is derived from wgss ACBE01225964.1 (exon 1), ACBE01225963.1 (exons 3-4), ACBE01225962.1 (exon 5), ACBE01225960.1 (exon 6), ACBE01225961.1 (exon 7), ACBE01225955.1 (exons 8-15), ACBE01225954.1 (exon 16), ACBE01225952.1 (exon 17), ACBE01225951.1 (exon 18), ACBE01225949.1 (exons 19-22), ACBE01225948.1 (exons 23-27), ACBE01225947.1 (exons 28-34), ACBE01225946.1 (exon 35), ACBE01225945.1 (exons 36-37), ACBE01225944.1 (exon 38), ACBE01225943.1 (exons 39-42), ACBE01225942.1 (exons 43-45), ACBE01225941.1 (exons 46-47), ACBE01225940.1 (exon 48), and ACBE01225939.1 (exons 49-52). Exon 2 was provided by trace TI1950120789. The 3' end of exon 4 was provided by trace TI898344027.

Large flying fox (*Pteropus vampyrus*) VWF cDNA sequence BK008004 (exons 1-20) and BK008005 (exons 21-52) are derived from wgss ABRP01038654.1 (exon 2), ABRP01360519.1 (exon 3), ABRP01038656.1 (exons 4-6), ABRP01038659.1 (exons 7-10), ABRP01038660.1 (exons 11-12), ABRP01038661.1 (exon 13), ABRP01038662.1 (exons 14-18), ABRP01038663.1 (exons 19-20), ABRP01038664.1 (exon 21), ABRP01038665.1 (exons 22-24), ABRP01038666.1 (exons 25-34), ABRP01038668.1 (exons 35-40), ABRP01038669.1 (exons 41-47), and ABRP01038672.1 (exons 48-52). Exon 12 was edited based on trace TI1379389256. The gap between BK008004 and BK008005 corresponds to approximately 56 nt at the 3' end of exon 20.

Nine-banded armadillo (*Dasypus novemcinctus*) VWF cDNA sequence BK007983 is derived from htgs AC163260.2 (exons 1-41); wgss AAGV020435885.1 (exon 42), AAGV020435888.1 (exon 44), AAGV020435889.1 (exons 46-47), AAGV020561273.1 (exon 51); and traces TI1895851916 (exon 17), TI1885723830 (exon 43), TI1873705844 (exon 45), TI2005246912 (exon 48), TI1641417980 (exon 49), TI1803631052 (exon 50), and TI1873812382 (exon 52).

Domestic guinea pig (*Cavia porcellus*) VWF cDNA sequence BK007982 is derived from wgss AAKN02051671.1 (exons 1-16) and AAKN02051670.1 (exons 17-52).

Gray short-tailed opossum (*Monodelphis domestica*) VWF cDNA sequence BK007990 is derived from wgss AAFR03037682.1 (exons 2-6), AAFR03037678.1 (exons 7-37), AAFR03037676.1 (exons 38-39), and AAFR03037675.1 (exons 40-52).

Green anole lizard (*Anolis carolinensis*) VWF cDNA sequences BK008000 (exons 1-32) and BK008001 (exons 34-52) are derived from wgss AAWZ02019413.1 (exons 1-14), AAWZ02019412.1 (exons 15-19), AAWZ02019410.1 (exons 22-31), AAWZ02019409.1 (exon 32), AAWZ02019408.1 (exons 34-46), and AAWZ02019407.1 (exons 47-52). The gap between BK008000 and BK008001 corresponds to exon 33, or approximately 44 nucleotides.

Zebrafish (*Danio rerio*) VWF cDNA sequence BK007984 is derived from wgss CABZ01015114.1 (exon 2), CABZ01015113.1 (exons 3-7), CABZ01015112.1 (exons 8-18), CABZ01015111.1 (exons 19-20), CABZ01015110.1 (exon 21), CABZ01015109.1 (exons 22-33), CABZ01015108.1 (exons 34-36), CABZ01015107.1 (exons 37-45), and CABZ01015106.1 (exons 46-52). Splice sites for exons 38-52 are

supported by comparison to cDNA entries EB902243.1, EH543632.1, and EB978371.1 BK007984 is similar to predicted XM\_002665310.1, except that exons 4, 5, 7, 8, 10, 29, 43, and 44 appear to be incorrect in XM\_002665310.1.

Japanese medaka (*Oryzias latipes*) VWF cDNA sequence BK007992 is derived from wgs BAAF04048397.1 (exons 2-51) and BAAE01258935.1 (exons 45-52).

Three-spined stickleback (*Gasterosteus aculeatus*) VWF cDNA sequence BK007987 is derived from wgs AANH01001674.1 (exons 2-52).

Spotted green pufferfish (*Tetraodon nigroviridis*) VWF cDNA sequence BK007998 is derived from wgs CAEE01015122.1 (exons 2-52).

Torafugu (*Takifugu rubripes*) VWF cDNA sequence BK007999 is derived from wgs CAAB01000205.1 (exons 2-52).

Western lowland gorilla (*Gorilla gorilla*) VWF cDNA sequence (VWFgorilla, appended after Table S1) is derived from wgs CABD02074492.1 (exons 1-3), CABD02074490.1 (exons 4-5), CABD02074487.1 (exon 6), CABD02074482.1 (exons 7-10), CABD02074481.1 (exons 11-16), CABD02074479.1 (exon 17), CABD02074478.1 (exon 18), CABD02074477.1 (exons 19-24), CABD02230032.1 (exons 25-32), CABD02074475.1 (exons 33-34), CABD02074472.1 (exons 35-42), CABD02074469.1 (exons 43-47), and CABD02074467.1 (exons 48-52). Human, chimpanzee, gorilla and orangutan genomes contain a VWF locus on chromosome 12 and a partial unprocessed pseudogene on chromosome 22 that is approximately 96% identical to the gene sequence (5). The sequence of gorilla VWF exon 28 was confirmed to be from the VWF gene by sequencing of genomic DNA isolated from peripheral blood of a gorilla, using PCR primers to selectively amplify and sequence exon 28 from the VWF gene (5). Comparisons with the human VWF gene and pseudogene suggests that the sequences for gorilla VWF exons 25, 26, 29, 30, 31 and 33 are from the VWF gene, but that exons 23, 24, 27, 32, and 34 contain some pseudogene sequences, probably due to errors in genome assembly.

Bottlenosed dolphin (*Tursiops truncatus*) VWF cDNA sequence (VWFtursiops, appended after Table S1) is derived from wgs ABRN01165339.1 (exon 3), ABRN01165340.1 (exon 4), ABRN01165341.1 (exon 5), ABRN01165342.1 (exons 6-10), ABRN01165343.1 (exons 11-16), ABRN01165344.1 (exons 17-18), ABRN01165346.1 (exons 19-20), ABRN01165347.1 (exon 21), ABRN01165348.1 (exons 22-26), ABRN01165349.1 (exons 27-28), ABRN01165350.1 (exons 28-30), ABRN01165351.1 (exons 32-43), ABRN01165352.1 (exons 44-47), ABRN01165353.1 (exons 49-50), and ABRN01355946.1 (exons 51-52). For alignments, gaps corresponding to exons 2, 31, and 48, as well as incomplete portions of exons 17 and 28, were assigned lengths equal to the corresponding human VWF exons.

## **Mucin sequences**

Chicken (*Gallus gallus*) MUC2 cDNA sequence is based on predicted refseq XM\_421035.2, which was edited to correct splice sites between exons 4 and 5 by alignment with chromosome reference assembly NC\_006092.2 and other MUC2 homologs. MUC6 is predicted refseq XM\_426405.2.

Dog (*Canis lupus familiaris*) MUC2 cDNA sequence is based on predicted refseq XM\_540774.2. MUC5AC cDNA sequence is predicted refseq XM\_540775.2, which is incorrectly annotated as MUC5B. MUC5B is predicted refseq XM\_540777.2. MUC6 is predicted refseq XM\_540773.2. MUC19 is predicted refseq XM\_847204.1.

Cattle (*Bos taurus*) MUC19 cDNA sequence is predicted refseq XM\_002687376.1.

Pig (*Sus scrofa*) MUC19 cDNA sequence is AF005273.1.

Horse (*Equus caballus*) MUC2 cDNA sequence is based on predicted refseq XM\_001492997.1 (nt 1-3673) and predicted refseq XM\_001502065.1 (nt 3392-4233). MUC5AC is based on predicted refseq XR\_044663.1, edited to correct exon 12 from reference assembly NC\_009155.2 and genomic traces.

Human (*Homo sapiens*) MUC2 cDNA sequence is refseq NM\_002457.2. MUC5AC is predicted refseq XM\_001717880.2. MUC5B is predicted refseq XM\_001129427.1. MUC6 is validated refseq NM\_005961.2. MUC19 is predicted refseq XM\_497341.3. This version has some errors in gene prediction at the 5' end but the region corresponding to domains D1D2D3 appears to be correct. The later version XM\_497341.4 is missing substantial segments of domain D1.

Mouse (*Mus musculus*) MUC2 cDNA sequence is based on predicted refseq XM\_001001905.1 (nt 1-3375), EST BF578645.1 (nt 3376-3506), and predicted refseq XM\_001001905.1 (nt 3507-7374). MUC5AC is based on validated refseq NM\_010844.1 edited to add 3 nt at the 3' end of exon 10 based on alignment with other MUC5AC homologs and genomic working draft sequence AC020817.3. MUC5B is validated refseq NM\_028801.2. MUC6 is cDNA BC120907.2. MUC19 is provisional refseq NM\_207243.2.

Rat (*Rattus norvegicus*) MUC2 cDNA sequence is cDNA U07615.1. MUC5AC is partial cDNA AB042530.1. MUC5B is predicted refseq XM\_238988.5. MUC6 is based on predicted refseq XM\_215127.6, with editing of exons 2 and 5 based on alignment with mouse MUC6 cDNA BC120907.2 and genomic scaffold NW\_047563.2. MUC19 is predicted sequence BK005555.1.

African clawed frog (*Xenopus laevis*) integumentary mucin B1 (FIMB1) cDNA sequence is Y08296.1.

### **Phylogenetic Analysis**

Protein sequences of VWF and mucins were aligned with MegAlign (version 8.1.5, DNASTAR, Inc., Madison, WI) using the Clustal W method, Gonnet protein weight matrices, gap penalty 10, and gap length penalty 0.2. Because the proteins compared are relatively similar, the alignment is relatively insensitive to the choice of parameters or weight matrix. For example, nearly identical results were obtained with PAM or BLOSUM matrices, particularly with respect to alignment of Cys or His residues.

TABLE S1. Non-canonical splice sites in VWF genes

| Species                | Intron | Donor Sequence  | Acceptor Sequence | Evidence                                                                           |
|------------------------|--------|-----------------|-------------------|------------------------------------------------------------------------------------|
| <i>M. domestica</i>    | 13     | ggtgaagGCaagtcc | ctcctcAGttgtctc   | Alignment with other VWF genes                                                     |
| <i>A. carolinensis</i> | 26     | cctgcagGCaagcat | tgaaacAGgaaaaat   | Alignment with other VWF genes and <i>A. carolinensis</i> spliced mRNA transcripts |
| <i>T. nigroviridis</i> | 39     | attaaagGCaagctt | gtgtgcAGctcctgt   | Alignment with other VWF genes                                                     |
| <i>T. nigroviridis</i> | 48     | tgtacagGCaagcaa | tcctgcAGgtgaacg   | Alignment with other VWF genes                                                     |
| <i>T. rubripes</i>     | 39     | attaaagGCaagctt | gtatacAGctcctgt   | Alignment with other VWF genes                                                     |
| <i>G. aculeatus</i>    | 39     | gtcagagGCaagatt | gtgtgcAGctccagt   | Alignment with other VWF genes                                                     |
| <i>O. latipes</i>      | 4      | aaaaaagGCacaagc | tctcgcAGactcact   | Alignment with other VWF genes                                                     |
| <i>D. rerio</i>        | 44     | gaggcagGCgagtgt | gtttgaAGgtcggag   | Alignment with other VWF genes and <i>D. rerio</i> spliced mRNA transcripts        |

>VWFgorilla Gorilla gorilla VWF cDNA sequence

agctcacagctattgtgggtgggaaggagggtgggtggatgtcacagcttggcctttatctccccagcagtgagg  
actccacagcccctgggtacataacagcaagacagtcgaggctgtagcagacctgattgagcctttgagcagctgag  
agcatggcctaggggtggcgccaccattgtccagcagctgagtttccaggacacctggagataccccgagccctcattt  
gcaggggaagatgattcctgccagagttgccgggtgctgcttctggccctcattttgcccagggaccctttgtgcag  
aaggaactcgcggcaggtcatccatggcccgatgcagcctcttcggaaatgacttcgtcaaacacctttgatgggagcatg  
tacagctttgcccagatactgcagttacctcctggcaggggctgccagaaacgctccttctcgattattggggactcca  
gaatggcaagagagtgagctctcctgtatcttggggaatTTTTTgacatccatttgtttgtcaatggtactgtgacac  
agggggaccaaagagtctccatgccctatgcctccaaagggtgtatctagaaactgaggctgggtactacaagctgtct  
ggtgaggcctatggctttgtggccaggatcgatggcagcggcaactttcaagtcctgctgtcagacagatactcaacaa  
gacctgcccgtgtgtggcaactttaacatctttgctgaagatgactttatgacccaagaagggaccttgacctcggacc  
cttatgactttgccaactcatgggctctcagcagtgaggaaacagtggtgtgaacgggtatctcctccagcagctcatgc  
aacatctcctctggggaaatgcagaaggcctgtgggagcagtgccagcttctgaagagcacctcgggtgtttgccgctg  
ccacctctggtggaccccagaccttttggccctgtgtgagaagcgttgtgtgagtgctggggggctggagtgcg  
cctgccctgacctcctggagtacgcccggacctgtgccaggagggaatggtgtgtacggctggaccgaccacagcgcg  
tgcagcccagtggtcctgctggatggagtataagcagtggtgtgtccccttgcgccaggacctgccagagcctgcacgt  
caatgaaatgtgtcaggagcagatgcgtggatggctgcagctgccctgagggacagctcctggatgaaggcctctgcgtgg  
agagcacagagtgctcctgctgtcattccggaaaacgctacctcccggcctcctctctcgagactgcaaacacctgc  
atttgcgaaacagccagtggtatctgcagcaatgaagaatgtccaggggagtgctcgtcacaggtcaatcccacttcaa  
gagctttgacaacagatacttcacctcagtggttttggcagtacctgctggcccgggattgccaggaccactccttct  
ccattgtcattgagaccgtccagtgctgtatgaccgcagcgtgtgtgaccccgtcctgacacctcggctgctggc  
ctgcacaacagcctagtgaactgaagcatggggaggagttgccatggatggccaggagctccagctccccctcctgaa  
aggtgacctccgcataccagcagcagtgacggcctcctgctgcctcagctacggggaggacctgcagatggactgggatg  
gccgcccggaggctgctgggtgaagctgtccccgtctacgcccgggaagacctgcccctgtgtgggaattacaatggcaac  
cagggcgagcacttcttaccctcctgggctggcggagcccgggtggaggacctcgggaacgctggaagctgcacgg  
ggactgccaggacctgcagaagcagcacagcagatccctgcccctcaaccgctgacagcaggttctcagaggaggcgt  
gctggctcctgagctccccacattcgaggcctgccatcgtgccctcagcccgtgccctacctgcggaactgccgctac  
gacgtgtgctcctgctcggacggccgagtgctgtgcccgcctggccagctatgcccggcctgctgcccgggagagg  
cgtgctgctgctgctggcggagccaggcctgtgagctgaactgccgaaaggccagggtgtacctgcagtgcccggacc  
cctgcaacctgacctgcccgtctctcttaccggatgaggaaatgcaatgaggcctgctggagggtgcttctgcccc  
ccagggtctacatggatgagaggggggactgctgtcccaggccagtgccccctgttactatgatgggtgagatcttcca  
gccagaagacatcttctcagaccatcacaccatgtgctactgtgaggatggcttcatgactgtaccatgagtgaggctc  
ccggaagcttctgctcccagcgtgtcctcagcagctcccctgtctcatgcagcaaaaggagcctatcctgtcggcccc  
atggtcaagctggtgtgtcccgtgacaacctgcccgtgaaggctcgagtggtccaaaacgtgccagaattacgacct  
ggagtgcatgagcattggctgtgtctctggctgctcctgccccccgggcatggtccggcatgagaacagatgtgtggcc  
tggaaagggtgctcctgcttccatcagggaaggagatgcccctgggaaacagtgaaagattggctgcaaaccttgtgtc  
tgtcgggaccggaagtggaaactgcacagaccatgtgtgtgacgccagtgctccacgatcggcatggccactacctcac  
cttcgacgggtcaaatatcatgttccccggggagtgccagctcgttctgggtgacaggattactgcccagtaacctggga  
ccttccggatcctagtggggaacgaggatgcagccatcctcagtgaaatgcaagaaacgggtcaccatcctggtggag  
ggaggagagattgagctgttcgacggggaggcgaatgtgaagaggccatgaaggatgagactcactttgaggtggggga  
gtctggccggtacatcattctgctgctgggcaaaagccctcctcctggtctgggaccgccacctgagcatctcctggtcc  
tgaagcagacataccaggagaagtggtgtggcctgtgtgggaatTTTgatggcatccagaacaatgacctaccagcagc  
aacctccaagtgagggaagacctgtggactttgggaactcctggagagtgagctcgcagtgctgtgacaccagaaaagt  
gcctctggactcatccccgccacctgccataacaacatcatgaagcagacaatggtggattcctcctgtagaatcctta  
ccagtgacgtcttccaggactgcaacaagctggtggaccccagccataacctggacgtctgcatttacgacacatgctcc  
tgtgagtgccattggggactgctcctgcttctgctgacaccattgctgctatgccaccgtgtgtgccagcatggcaagg  
ggtgacctggaggacggccacattgtgccccagagctgagaggagaggaaatcctccgggagaacgggtatgagtgcgagt  
ggcgtataacagctgtgcacctgctgtcaagtacgtgccagcaccctgagccgctggcctgcccctgtgcagtggtg  
gagggtgcatgcccactgcccctccagggaatcctggatgagcttttgcagacctgcttgaccctgaagactgcc  
ggtgtgtgaggtggctggctggtgttttgcctcaaaaagaaagtacacttgaatcccagtgacctgagcactgccaga  
tttgcactgtgatggtgtcaacctcacctgtgaagcctgccaggagccggaggcctggtggggcctcccacagatgcc  
ccggtgagccccaccctcctgtatgtggaggacatcttggaaaccgctgtgcagatcttctactgcagcaggctactgga  
cctggtcttctgctggatggctcctccaggctgtccgaggctgagtttgaagtgtgaaggcctttgtgggtggacatga

tggagcggctgcgcacatcccagaagtgggtacgcgtggccgtggaggtagtaccacgacggctcccacgcctacattggg  
ctcaaggaccggaagcagaccgtcagagctgcccgcattgccagccaggatgaagtatgccccagccagggtggcctccac  
cagcagggctctgaaatacacactgttccaaatcttcagcaagatcgaccgccctgaagcctcccgcacgcccctgctcc  
tgatggccagccaggagccccagcggatgtcccggaactttgtccgctacgtccagggcctgaagaagaagaaggctac  
gtgatcccagtgggcattgggccccatgccaacctcaagcagatccgctcattgagaagcaggccccctgagaacaaggc  
cttcgtgctgagtggtgtggatgagctggagcagcaaggagcagatcgcttagctacctctgtgacctggccccgaag  
ccccctcctactctgccccccacatggcacaagtcactgtgggcccggggctctgggggtttcgaccctggggccc  
aagaggaactccatggttctggatgtggcgtttgtcctggaaggatcggaacaaatgggtgaagccgacttcaacaggag  
caaggagttcatggaggaggatgattcagcggatggatgtgggcccaggacagatccatgtcacgggtgctgcagtactcct  
acatggtgaccgtggagtacccttcagcggaggcacagtccaaaggggacatcctgcagcgggtgcgagagatccgctac  
cagggcggcaacaggaccaacactgggctggccccgaggtacctctgcaccacagcttcttggtcagccaggggtgaccg  
ggagcagggcggcaacactggtctacatggtcaccggaatcctgcctctgatgagatcaagaggctgctggagacatcc  
agggtggtgccattggagtgggccccaatgccaacatgcaggagctggagaggatcggtggccccaatgccccatcctc  
atccaggactttgagacgctccccgagaggctcctgacctggtgctgcagagggtgctgctccggagaggggctgcagat  
ccccaccctctcccctgcatctgactgcagccagccccggacgtgatccttctcctggatggctcctccagtttcccag  
cttcttattttgatgaaatgaagagtttcgcaaggctttcatttcagaagccaatatagggcctcgtctcactcagggtg  
tcagtctgcagatggaagcatcaccaccattgacgtgccatggaacgtgggtcccggagaaagcccatttctgtagcct  
tgtggacgtcatgcagcgggaggaggccccagccaatcggggatgcttgggctttgcttgcgatacttgacttcag  
aaatgcatggtgccaggcgggagcctcgaaggcgggtgctcctggctcatggatgtctctgtggatcagtggtatgca  
tcagctgatgccgcccaggcccaacagagtgacagtgcttccctattggaattggagatcactacgatgcagcccagctacg  
gatgttggccggcccagcaggcactccaacatggtgaagctccagcaaatgaagacctcctaccatggtcaccttgg  
gcaatccttctccacaactgtgctctggatttggtaggatttgcagtgatgaggatgggaatgagaagaggcctggg  
gacgtctggaccttgcagaccagtgccacaccgtgacttgcagccagatggccagaccttgcagagagtcacgggt  
caactgtgaccggggaccgaggcctcatgcccctaacagccagctcccctgttaagtggaagagacctgtggctgccgct  
ggacctgccccctgcgtgtgcacaggcagctccactcggcacatcgtgaccttggatgggcagaatttcaagctgactggc  
agctgttcttatgtcctatttcaaaacaaggagcaggacctggagggtgattctccataatggtccctgcagccccggagc  
aaggcagggctgcatgaaatccatcgaggatgaagcacagtgccccctcctcgctcagctgcacagtgacatggagggtgacgg  
tgaatgggagactggtctctgttcttctacgtgggtgggaacatggaagtcaacgtttatgggtgccatcatgcatgaggtc  
agattcaatcaccttggctacatcttcacattcactccacaaaacaatgagttccaactgcagctcagccccagacttt  
tgcttcaagatgtatggtctgtgtgggatctgtgatgagaatggagccaatgacttcatgctgagggatggcacagtc  
ccacagactggaaaacacttgttccaggaatggactgtgcaacggccaggcagacgtgccagccccatcctggaggagcag  
tgtcttgtcccctgacagctcccactgcccaggtcctccttaccactggttgcagatgccacaaggctcctggctccagc  
cacattctatgccatctgccagcaggacagttgccaccaggagcagtggtgtgaggatgcgctcttatgccacctct  
gtcggaccaatggggtctgcattgactggaggacgctgatttctgtgctatgtcatgccaccatctctggctctacaac  
cactgtgagcatggctgtccccggcactgtgatggcaacgtgagctcctgtggggaccatccccccaaggctgtttctg  
cccccaataaagtcatgttgggaaggcagctgtgtcctgaagaggcctgcactcagtgcatgggtgaggatggagtc  
agcaccagttcctggaagcctgggtcccggaccaccagcctgtcagatctgcacgtgctcagcggggcgaaggctaac  
tgcacaacgcagccccgcccacggccaaagctcccacgtgtggcctgtgtgaagttagccacctccgcagaatgcaga  
ccagtgctgccccgagatgagtggtgtgtgacccagtgagctgtgacctgccccagtgctcactgtgaacgtggcc  
tccagcccacactgaccaacctggcgagtgacacccaactcactgcgctgcaggaaggaggagtgcaaaagagtg  
tccccaccctcctgccccccgaccgtttgcccacccttcggaagaccagtgctgtgatgagatgagtgctcctgcaa  
ctgtgtcaactccacagtgagctgtccccttgggtacttggcctcaaccgcccacaaatgactgtggctgtaccacaacca  
cctgccttctgacaagggtgtgtgtccaccgaagcaccatctaccctgtgggcccagttctgggaggagggtcgcgatgtg  
tgcacctgcaccgacatggaggatgtcgtgatgggctccgctggccagtgctcccagaagcctgtgaggacagctg  
tcggtcgggcttcaactacgttctgcatgaaggcagtgctgtggaaggctgctgccatctgctgtgagggtggtgaccg  
gctcaccgccccgggactcccagcttctcctggaagagtgctggctcccagtgggcctccccggagaacccctgcctc  
agtgagtgctcggagtggaaggagggtctttatacaacaaaggaaagctcctgccccagttggaggctcctgtctg  
ccccctgggcttctcagctgagctgtaagacctcagcgtgctgcccagctgctgctgtgagcgcattggaggcctgcatgc  
tcaatggcactgtcattgggccccgggaagactgtgatgatcagatgtgtgcacgacctgcccgtgcatggtgcagggtggg  
gtcatctctggattcaagctggagtgagggaagaccacctgcaacccctgccccctgggttacaaggaagaaaataaac  
aggatgaatgttgggagatgtttgctacggcttgaccattcagctaaagaggaggacagatcatgacactgaagcgtg  
atgagacgctccaggatggctgtgatactcacttctgcaaggctcaatgagagaggagagtagtcttctgggagaagagggtc  
acaggctgccccacccttggatgaacacaagtgctgtggctgaggagggtaaaattatgaaaattccaggcacctgctgtga









## Supplemental Figure Legends

FIG. S1. **Phylogenetic tree of vertebrates with sequenced VWF genes.** A taxonomic tree was constructed with the “Common Tree” tool and the lineages in the NCBI taxonomy database for the species indicated (<http://www.ncbi.nlm.nih.gov/guide/taxonomy/>, accessed November 1, 2010).

FIG. S2. **Sequence pair distances for VWF.** The protein sequences of VWF were aligned with MegAlign (version 8.1.5, DNASTAR, Inc., Madison, WI) using the Clustal W method and Gonnet protein weight matrices. For the aligned sequences, the graph displays percent identity directly above the diagonal, and divergence by comparing sequence pairs in relation to the reconstructed phylogeny below the diagonal.

FIG. S3. **Alignment of VWF domains D1D2D'D3.** Protein sequences of VWF corresponding to the D1D2D'D3 domains of human VWF (residues 23-1227) were aligned with MegAlign using the Clustal W method and Gonnet protein weight matrices. Residues that match human VWF exactly are boxed and shaded *yellow*. His residues are shaded *green* if present in human VWF and *blue* if not.

FIG. S4. **Alignment of D1D2D'D3 domains for human VWF and vertebrate gel-forming mucins.** Protein sequences of human VWF corresponding to the D1D2D'D3 domains (residues 23-1227) were aligned to the indicated representative gel-forming mucins with MegAlign using the Clustal W method and Gonnet protein weight matrices. Residues that match human VWF exactly are boxed and shaded *yellow*. His residues are shaded *green* if present in human VWF and *blue* if not.

FIG. S5. **Expression of separate VWF D1D2 and D'D3 constructs with His mutations.** BHK-fur4 cells were transiently transfected with wild type (WT) or mutant D1D2 and D'D3 constructs having the indicated amino acid substitutions. Conditioned medium (A) and cell lysates (B) were analyzed by SDS-PAGE and Western blotting with HRP-conjugated anti-VWF. Positions corresponding to monomeric D'D3, D1D2, and dimeric (D'D3)<sub>2</sub> are indicated at the left.

### Supplemental References

1. Sadler, J. E., Shelton-Inloes, B. B., Sorace, J. M., Harlan, J. M., Titani, K., and Davie, E. W. (1985) *Proc. Natl. Acad. Sci. USA* **82**, 6394-6398
2. Shelton-Inloes, B. B., Broze, G. J., Jr., Miletich, J. P., and Sadler, J. E. (1987) *Biochem. Biophys. Res. Commun.* **144**, 657-665
3. Bonthron, D. T., Orr, E. C., Mitsock, L. M., Ginsburg, D., Handin, R. I., and Orkin, S. H. (1986) *Nucleic Acids Res.* **14**, 7125-7127
4. Mancuso, D. J., Tuley, E. A., Westfield, L. A., Worrall, N. K., Shelton-Inloes, B. B., Sorace, J. M., Alevy, Y. G., and Sadler, J. E. (1989) *J. Biol. Chem.* **264**, 19514-19527
5. Mancuso, D. J., Tuley, E. A., Westfield, L. A., Lester-Mancuso, T. L., Le Beau, M. M., Sorace, J. M., and Sadler, J. E. (1991) *Biochemistry* **30**, 253-269
6. Dogan, R. I., Getoor, L., Wilbur, W. J., and Mount, S. M. (2007) *Nucleic Acids Res* **35**, W285-291

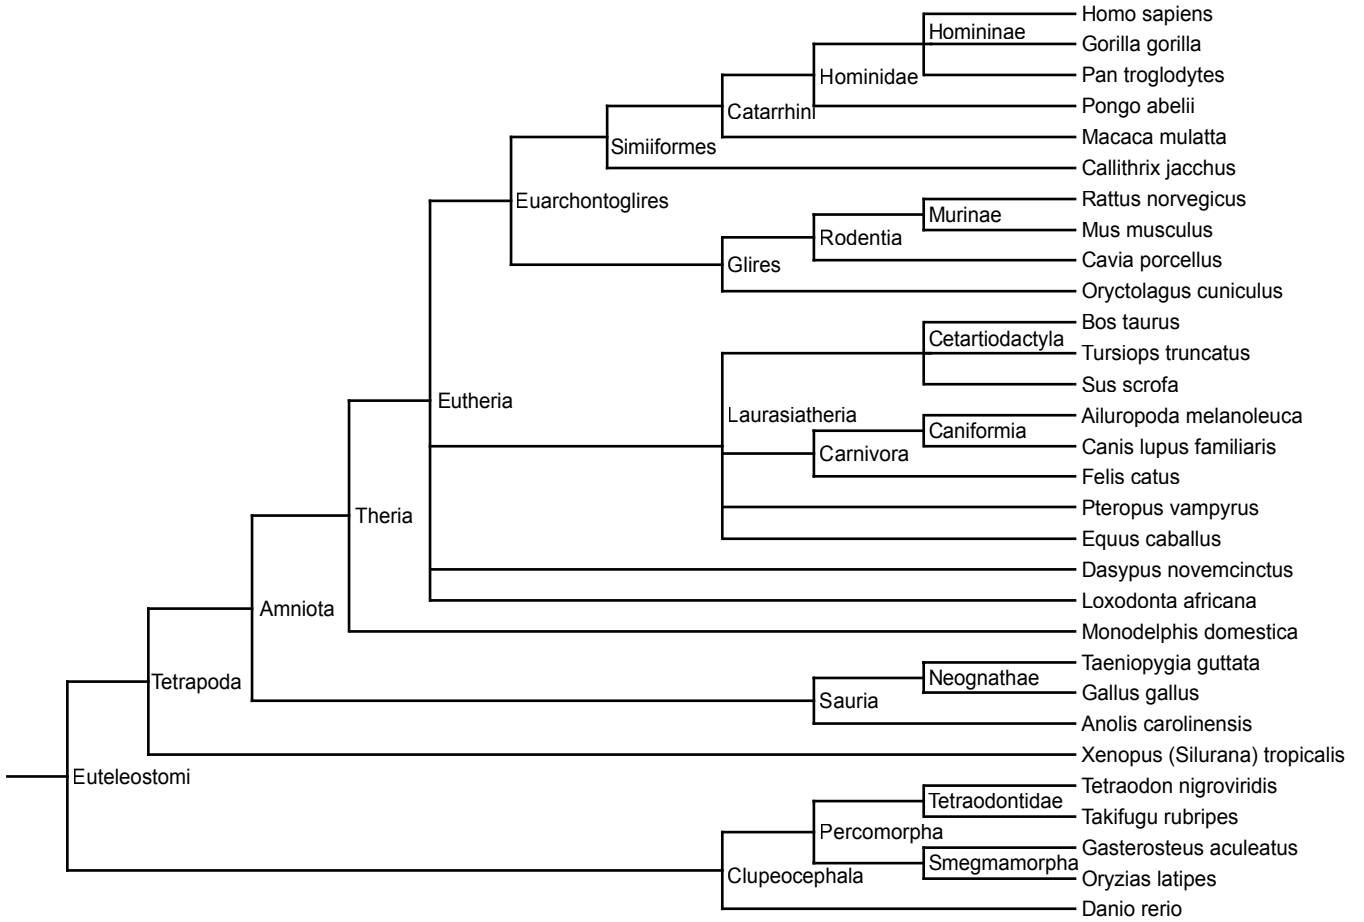

Dang et al  
Figure S1

Percent Identity

|            |    | 1    | 2    | 3    | 4    | 5    | 6    | 7    | 8    | 9    | 10   | 11   | 12   | 13   | 14    | 15   | 16   | 17   | 18   | 19   | 20   | 21   | 22   | 23   | 24   | 25   | 26   | 27   | 28   | 29   | 30   |    |                    |
|------------|----|------|------|------|------|------|------|------|------|------|------|------|------|------|-------|------|------|------|------|------|------|------|------|------|------|------|------|------|------|------|------|----|--------------------|
| Divergence | 1  | █    | 99.0 | 98.4 | 98.0 | 96.4 | 93.3 | 85.8 | 85.3 | 86.2 | 86.6 | 86.7 | 86.3 | 81.4 | 78.0  | 84.5 | 82.8 | 83.2 | 82.5 | 83.4 | 82.2 | 73.4 | 56.3 | 56.2 | 55.8 | 54.8 | 46.5 | 45.2 | 44.9 | 45.4 | 45.8 | 1  | VWF_H_sapiens      |
|            | 2  | 1.0  | █    | 98.4 | 97.8 | 96.1 | 93.0 | 85.6 | 85.1 | 86.2 | 86.6 | 86.6 | 86.2 | 81.4 | 78.1  | 84.4 | 82.7 | 83.2 | 82.5 | 83.3 | 82.1 | 73.4 | 56.3 | 56.2 | 55.8 | 54.9 | 46.5 | 45.1 | 44.8 | 45.2 | 45.7 | 2  | VWF_P_troglodytes  |
|            | 3  | 1.6  | 1.6  | █    | 97.6 | 95.8 | 92.9 | 85.4 | 84.9 | 86.0 | 86.1 | 86.4 | 85.7 | 81.0 | 77.7  | 83.9 | 82.4 | 82.9 | 82.4 | 83.0 | 81.8 | 73.1 | 56.4 | 56.0 | 55.8 | 54.6 | 46.3 | 44.9 | 44.7 | 45.2 | 45.7 | 3  | VWF_G_gorilla      |
|            | 4  | 2.0  | 2.2  | 2.4  | █    | 96.3 | 93.2 | 85.8 | 85.2 | 86.2 | 86.5 | 86.7 | 86.2 | 81.4 | 78.0  | 84.4 | 82.9 | 83.2 | 82.4 | 83.3 | 82.2 | 73.3 | 56.6 | 56.3 | 55.9 | 54.9 | 46.4 | 45.2 | 44.8 | 45.4 | 45.9 | 4  | VWF_P_abelii       |
|            | 5  | 3.7  | 4.0  | 4.3  | 3.8  | █    | 92.7 | 85.5 | 84.9 | 85.6 | 86.3 | 86.3 | 85.7 | 81.1 | 77.9  | 84.1 | 82.5 | 82.7 | 82.1 | 82.9 | 81.7 | 73.1 | 56.8 | 56.7 | 56.1 | 55.1 | 46.5 | 45.2 | 44.7 | 45.1 | 45.9 | 5  | VWF_M_mulatta      |
|            | 6  | 7.1  | 7.4  | 7.5  | 7.1  | 7.7  | █    | 84.7 | 83.9 | 84.8 | 85.2 | 85.2 | 84.4 | 80.5 | 76.9  | 83.1 | 81.9 | 82.1 | 81.8 | 82.2 | 80.9 | 73.1 | 56.2 | 56.0 | 55.8 | 54.5 | 46.3 | 45.0 | 44.8 | 45.0 | 45.6 | 6  | VWF_C_jacchus      |
|            | 7  | 15.7 | 16.0 | 16.3 | 15.8 | 16.2 | 17.1 | █    | 83.7 | 84.8 | 85.0 | 84.7 | 84.7 | 78.9 | 76.3  | 82.0 | 81.8 | 81.3 | 80.8 | 81.6 | 81.0 | 73.5 | 57.2 | 56.6 | 56.6 | 54.7 | 46.5 | 44.9 | 44.6 | 44.9 | 45.3 | 7  | VWF_L_africana     |
|            | 8  | 16.4 | 16.6 | 16.9 | 16.5 | 16.9 | 18.1 | 18.4 | █    | 91.5 | 90.3 | 86.3 | 85.9 | 81.3 | 77.5  | 83.8 | 81.5 | 81.6 | 81.7 | 82.6 | 81.5 | 72.8 | 57.0 | 56.8 | 56.3 | 54.8 | 46.5 | 45.5 | 45.3 | 45.1 | 45.7 | 8  | VWF_A_melanoleuca  |
|            | 9  | 15.3 | 15.3 | 15.6 | 15.3 | 16.0 | 17.1 | 17.1 | 9.0  | █    | 90.7 | 86.8 | 86.3 | 81.2 | 78.1  | 84.4 | 82.1 | 82.5 | 81.8 | 83.0 | 82.1 | 72.7 | 56.3 | 56.2 | 56.2 | 55.1 | 46.2 | 44.8 | 44.6 | 44.5 | 45.0 | 9  | VWF_C_lupus        |
|            | 10 | 14.8 | 14.8 | 15.4 | 14.9 | 15.2 | 16.5 | 16.8 | 10.4 | 9.9  | █    | 87.3 | 86.4 | 81.9 | 79.1  | 84.7 | 82.7 | 82.2 | 82.3 | 83.1 | 82.4 | 73.4 | 56.5 | 56.8 | 56.7 | 55.2 | 46.8 | 45.0 | 44.8 | 44.9 | 45.4 | 10 | VWF_F_catus        |
|            | 11 | 14.7 | 14.8 | 15.1 | 14.7 | 15.1 | 16.5 | 17.2 | 15.2 | 14.6 | 13.9 | █    | 87.2 | 81.8 | 78.7  | 85.0 | 83.1 | 81.9 | 81.5 | 83.3 | 82.3 | 73.1 | 56.9 | 56.5 | 56.4 | 55.1 | 46.1 | 45.2 | 45.2 | 45.0 | 45.5 | 11 | VWF_E_caballus     |
|            | 12 | 15.2 | 15.3 | 15.9 | 15.2 | 15.9 | 17.6 | 17.1 | 15.6 | 15.2 | 15.1 | 14.1 | █    | 81.0 | 77.8  | 84.4 | 82.7 | 82.1 | 81.4 | 82.7 | 81.7 | 72.5 | 55.8 | 55.8 | 55.2 | 54.2 | 45.4 | 44.0 | 43.9 | 43.7 | 44.3 | 12 | VWF_P_vampyrus     |
|            | 13 | 21.4 | 21.4 | 21.9 | 21.4 | 21.8 | 22.7 | 24.8 | 21.5 | 21.7 | 20.8 | 21.0 | 21.9 | █    | 80.5  | 83.8 | 79.2 | 78.5 | 77.8 | 78.3 | 77.7 | 69.5 | 54.7 | 55.3 | 54.3 | 53.2 | 46.4 | 45.0 | 44.8 | 45.2 | 45.6 | 13 | VWF_B_taurus       |
|            | 14 | 26.1 | 25.9 | 26.5 | 26.1 | 26.3 | 27.7 | 28.6 | 26.8 | 26.0 | 24.6 | 25.1 | 26.4 | 22.6 | █     | 80.8 | 75.5 | 74.7 | 74.9 | 75.7 | 75.6 | 66.5 | 52.8 | 53.4 | 52.5 | 52.3 | 44.5 | 43.3 | 43.0 | 43.1 | 43.4 | 14 | VWF_T_truncatus    |
|            | 15 | 17.5 | 17.6 | 18.2 | 17.5 | 18.0 | 19.1 | 20.6 | 18.3 | 17.6 | 17.2 | 16.8 | 17.5 | 18.3 | 22.3  | █    | 80.9 | 80.6 | 80.6 | 81.1 | 80.5 | 71.5 | 55.5 | 55.9 | 55.9 | 54.6 | 46.5 | 45.5 | 44.7 | 45.5 | 45.8 | 15 | VWF_S_scrofa       |
|            | 16 | 19.6 | 19.7 | 20.1 | 19.5 | 19.9 | 20.7 | 20.9 | 21.3 | 20.5 | 19.7 | 19.2 | 19.7 | 24.4 | 29.7  | 22.2 | █    | 80.3 | 78.9 | 79.4 | 78.9 | 70.8 | 55.4 | 55.6 | 55.1 | 53.9 | 46.4 | 45.1 | 45.1 | 45.1 | 45.5 | 16 | VWF_D_novemcinctus |
|            | 17 | 19.0 | 19.1 | 19.5 | 19.1 | 19.7 | 20.5 | 21.6 | 21.2 | 20.0 | 20.4 | 20.7 | 20.5 | 25.3 | 30.9  | 22.5 | 23.0 | █    | 79.6 | 80.7 | 79.9 | 71.6 | 54.7 | 55.0 | 54.8 | 53.9 | 45.8 | 45.1 | 45.0 | 44.9 | 45.7 | 17 | VWF_O_cuniculus    |
|            | 18 | 19.9 | 20.0 | 20.2 | 20.1 | 20.5 | 21.0 | 22.3 | 21.1 | 20.9 | 20.3 | 21.3 | 21.4 | 26.4 | 30.6  | 22.5 | 24.9 | 23.9 | █    | 80.8 | 80.8 | 70.4 | 55.6 | 55.7 | 55.2 | 53.7 | 46.5 | 45.4 | 45.3 | 45.4 | 45.6 | 18 | VWF_C_porcellus    |
|            | 19 | 18.8 | 19.0 | 19.3 | 19.0 | 19.5 | 20.4 | 21.1 | 19.8 | 19.4 | 19.1 | 19.0 | 19.7 | 25.6 | 29.4  | 21.9 | 24.2 | 22.4 | 22.3 | █    | 92.5 | 71.9 | 55.5 | 55.3 | 55.8 | 53.7 | 45.4 | 45.0 | 44.4 | 44.1 | 45.0 | 19 | VWF_M_musculus     |
|            | 20 | 20.4 | 20.5 | 20.9 | 20.4 | 21.1 | 22.1 | 22.0 | 21.2 | 20.4 | 20.1 | 20.3 | 21.0 | 26.5 | 29.6  | 22.6 | 24.8 | 23.5 | 22.2 | 7.9  | █    | 71.1 | 55.7 | 55.5 | 55.6 | 53.6 | 46.0 | 45.0 | 44.7 | 45.0 | 45.5 | 20 | VWF_R_norvegicus   |
|            | 21 | 32.9 | 32.8 | 33.4 | 33.0 | 33.4 | 33.3 | 32.7 | 33.7 | 34.0 | 32.9 | 33.3 | 34.2 | 39.2 | 44.3  | 35.9 | 36.9 | 35.7 | 37.6 | 35.2 | 36.5 | █    | 58.0 | 58.4 | 57.8 | 56.1 | 46.1 | 44.4 | 44.8 | 44.4 | 45.0 | 21 | VWF_M_domesticus   |
|            | 22 | 64.4 | 64.4 | 64.3 | 63.8 | 63.3 | 64.7 | 62.6 | 62.9 | 64.5 | 64.0 | 63.2 | 65.6 | 68.1 | 72.7  | 66.3 | 66.4 | 68.2 | 66.0 | 66.3 | 65.8 | 60.7 | █    | 80.2 | 62.4 | 55.6 | 43.8 | 43.5 | 44.3 | 44.1 | 44.0 | 22 | VWF_G_gallus       |
|            | 23 | 64.7 | 64.8 | 65.0 | 64.4 | 63.7 | 65.0 | 63.7 | 63.3 | 64.6 | 63.4 | 63.9 | 65.5 | 66.8 | 71.3  | 65.4 | 66.1 | 67.5 | 65.9 | 66.7 | 66.3 | 60.0 | 23.0 | █    | 60.8 | 55.5 | 44.3 | 44.3 | 44.8 | 43.8 | 44.1 | 23 | VWF_T_guttata      |
|            | 24 | 65.7 | 65.6 | 65.7 | 65.3 | 65.0 | 65.5 | 63.7 | 64.6 | 64.6 | 63.5 | 64.2 | 67.0 | 69.1 | 73.4  | 65.4 | 67.1 | 67.9 | 66.9 | 65.7 | 66.1 | 61.2 | 51.8 | 54.8 | █    | 56.1 | 44.8 | 43.8 | 43.3 | 44.2 | 44.3 | 24 | VWF_A_carolinensis |
|            | 25 | 68.0 | 67.6 | 68.3 | 67.7 | 67.2 | 68.6 | 68.1 | 67.8 | 67.3 | 67.0 | 67.1 | 69.2 | 71.8 | 73.9  | 68.4 | 69.9 | 70.1 | 70.5 | 70.5 | 70.7 | 64.8 | 66.1 | 66.4 | 64.8 | █    | 46.7 | 44.6 | 44.5 | 44.3 | 44.9 | 25 | VWF_X_tropicalis   |
|            | 26 | 89.7 | 89.7 | 90.4 | 89.9 | 89.7 | 90.3 | 89.8 | 89.7 | 90.8 | 88.9 | 90.9 | 93.2 | 90.1 | 95.7  | 89.6 | 90.1 | 91.9 | 89.7 | 93.1 | 91.4 | 90.8 | 98.0 | 96.5 | 94.8 | 89.1 | █    | 57.6 | 57.6 | 57.0 | 57.5 | 26 | VWF_D_erio         |
|            | 27 | 93.8 | 93.9 | 94.5 | 93.6 | 93.6 | 94.3 | 94.5 | 92.9 | 95.0 | 94.2 | 93.6 | 97.5 | 94.2 | 99.6  | 92.6 | 93.9 | 94.0 | 93.1 | 94.3 | 94.3 | 96.3 | 99.0 | 96.6 | 98.3 | 95.7 | 61.7 | █    | 77.6 | 77.1 | 77.3 | 27 | VWF_G_acleatus     |
|            | 28 | 94.6 | 95.0 | 95.3 | 94.8 | 95.2 | 95.1 | 95.7 | 93.3 | 95.4 | 94.8 | 93.5 | 97.7 | 95.0 | 100.8 | 95.3 | 93.8 | 94.2 | 93.4 | 96.1 | 95.2 | 94.9 | 96.6 | 94.9 | 99.7 | 95.9 | 61.5 | 26.6 | █    | 74.4 | 74.3 | 28 | VWF_O_latipes      |
|            | 29 | 93.1 | 93.5 | 93.5 | 93.1 | 94.1 | 94.2 | 94.6 | 94.0 | 95.9 | 94.7 | 94.3 | 98.6 | 93.8 | 100.3 | 92.9 | 94.1 | 94.5 | 93.1 | 97.2 | 94.2 | 96.1 | 97.1 | 98.0 | 96.7 | 96.4 | 62.9 | 27.4 | 31.3 | █    | 84.0 | 29 | VWF_T_nigroviridis |
|            | 30 | 91.9 | 92.2 | 92.2 | 91.7 | 91.5 | 92.3 | 93.5 | 92.1 | 94.3 | 93.1 | 92.6 | 96.6 | 92.4 | 99.3  | 91.9 | 92.8 | 92.0 | 92.3 | 94.3 | 92.7 | 94.4 | 97.6 | 97.3 | 96.5 | 94.8 | 61.8 | 27.0 | 31.5 | 18.0 | █    | 30 | VWF_T_rubripes     |
|            | 1  | 2    | 3    | 4    | 5    | 6    | 7    | 8    | 9    | 10   | 11   | 12   | 13   | 14   | 15    | 16   | 17   | 18   | 19   | 20   | 21   | 22   | 23   | 24   | 25   | 26   | 27   | 28   | 29   | 30   |      |    |                    |

Dang et al  
Figure S2

. . . . . C . . F . . . . . F D . . . Y . F . G . C S Y . L . G . C . . . . . All Match Human  
 . . . . . R C S L F G . . . . . T F D . . . Y . F . G . C S Y . L A G . C . . . S F . . 28/30 Match Human  
 A E G T L G R S S M A R C S L F G R D F I N T F D G S M Y S F A G D C S Y L L A G D C Q K X S F S L Majority

|    | 10                  | 20                | 30                      | 40                      | 50              |                    |
|----|---------------------|-------------------|-------------------------|-------------------------|-----------------|--------------------|
| 23 | A E G T R G R S S   | T A R C S L F G S | D F V N T F D G S M Y S | F A G Y C S Y L L A G G | C Q K R S F S I | VWF_H_sapiens      |
| 23 | A E G T R G R S S   | M A R C S L F G N | D F V N T F D G S M Y S | F A G Y C S Y L L A G G | C Q K R S F S I | VWF_P_troglodytes  |
| 23 | A E G T R G R S S   | M A R C S L F G N | D F V N T F D G S M Y S | F A G Y C S Y L L A G G | C Q K R S F S I | VWF_G_gorilla      |
| 23 | A E G T R G R S S   | M A R C S L F G S | D F I N T F D G S M Y S | F A G Y C S Y L L A G D | C Q K R S F S I | VWF_P_abelii       |
| 23 | A E G T R G R S S   | M A R C S L F G S | D F I N T F D G S M Y S | F A G Y C S Y L L A G D | C Q K R S F S I | VWF_M_mulatta      |
| 23 | A E G T R G R S S   | M A R C S L F G S | D V I N T F D G S M Y S | F A G Y C S Y L L A G D | C Q K H S F S I | VWF_C_jacchus      |
| 23 | T E G S R G R L S   | T A R C S L F G D | D F I N S F D E S M Y S | F A G G C S Y F L A G D | C Q E H S F S I | VWF_L_africana     |
| 23 | T K R T V G R S P   | M A R C S L F G D | D F I N T F D E S M Y S | F A G D C S Y L L A G D | C Q K H S F S L | VWF_A_melanoleuca  |
| 23 | T K G T V G R S S   | M A R C S L F G G | D F I N T F D E S M Y S | F A G D C S Y L L A G D | C Q E H S V S L | VWF_C_lupus        |
| 23 | A K E T V G R S S   | M A R C S L F G G | D F I N T F D E S M Y S | F M G D C S Y L L A G D | C Q K H S F S L | VWF_F_catus        |
| 23 | A E G T L G R S S   | M G R C S L F G G | D F V N T F D E S M Y S | F A G D C S Y L L A G D | C Q K R S F S L | VWF_E_caballus     |
| 23 | T E G T H G R S S   | M A R C S L F G A | D F I K T F D E S M Y S | F V G D C S Y L L A G D | C Q K H S F S L | VWF_P_vampyrus     |
| 23 | G E G A L G K S S   | M A R C S L F G A | D F I N T F D E S M Y S | F S G D C S Y L L A G D | C K T H S F S I | VWF_B_taurus       |
| 23 | G E G A L G R S S   | M A R C S L F G G | D S I N T F D E S M Y S | F E G S C S Y L L A G D | C Q T H S F S L | VWF_T_truncatus    |
| 23 | G E E T L G K S S   | M A R C S L F G S | N F I N T F D Q S M Y S | F A G S C S Y L L A G D | C Q K H S F S I | VWF_S_scrofa       |
| 23 | A E G - H D S L S   | G A R C G L F G D | D F I N T F D E S M Y S | F A G A C S Y L L A G D | C Q E H S F S L | VWF_D_novemcinctus |
| 26 | T E R T G Y Q P T   | M A R C S F F G R | D F V N T F D D S M Y S | F A G D C S Y L L A G D | C Q E R S F S I | VWF_O_cuniculus    |
| 23 | T E R T L D R P S   | T A R C S L F G R | D F I N T F D E N M Y S | F A G D C S Y L L A G D | C Q K H S F S V | VWF_C_porcellus    |
| 23 | T E K P R D R P S   | T A R C S L F G D | D F I N T F D E T M Y S | F A G G C S Y L L A G D | C Q K R S F S I | VWF_M_musculus     |
| 23 | T E D P R D R P S   | T A R C S L F G D | G F I N T F D E A M Y S | F A G G C S Y L L A G D | C Q K R S F S I | VWF_R_norvegicus   |
| 18 | T S D E K G Q K S   | V S R C T L F G D | D H I K T F D D H F Y S | F G G D C S Y L L T G D | C Q K H S F S I | VWF_M_domesticus   |
| 20 | S G S L L Q E S S   | V S R C S L F G K | D H I K T F D G S F Y S | F A G D C S Y L L A G D | C H K H S F T L | VWF_G_gallus       |
| 21 | S G V S L Q E S S   | A A R C S L F G N | D H I K T F D G S L Y N | F A G Y C S Y L L A G D | C H K H S F M L | VWF_T_guttata      |
| 19 | D G T E V A Q P -   | F G H C S L F G S | N H I K T F D E Y L Y D | F A G D C S Y L L A G D | C Q K R S F S L | VWF_A_carolinensis |
| 22 | A E G K L D W S V   | L A R C S L F G E | N H I Q T F D G T F Y D | F Y G D C S Y M L A G D | C N K H S F S L | VWF_X_tropicalis   |
| 17 | L S D L L L V E G S | A R C S L F S R   | Q H I H T F D G V I Y E | F P G D C S Y M L A G D | C R Q R S F S I | VWF_D_erio         |
| 17 | - - - - S V A G L T | G R C S L F G R   | Q H I H T F D G V L Y E | F P G D C S Y L L A G D | C S H R S F I L | VWF_G_aculeatus    |
| 20 | - - - - - V A G V T | G R C S L F G R   | Y H V H T F D G V L Y E | F P G D C S Y L L A G D | C S H R S F T L | VWF_O_latipes      |
| 24 | - - T A L V A S M   | S S R C S L F G R | H H I H T F D G V L Y E | F P G D C S Y L L A G D | C K H R S F T L | VWF_T_nigroviridis |
| 15 | - - T A L V A D A S | G R C S L F G R   | H H I H T F D G V L Y E | F P G D C S Y L L A G D | C K H R T F T L | VWF_T_rubripes     |



. . . . . G . . . . . L G . . F . . . . . G . . . . . P . . . . . All Match Human  
 . G . . . . G . . . . . L G . . F . . H . . . . . G . . . . . Q . . . . . P . A S . . . . . 28/30 Match Human  
 L G D F Q N G K R V S L S V Y L G E F F D I H L F V N G T V T Q G D Q R V S M P Y A S K G L Y L E T Majority

|    | 60                                                                                                  | 70 | 80 | 90 | 100 |                    |
|----|-----------------------------------------------------------------------------------------------------|----|----|----|-----|--------------------|
| 73 | I G D F Q N G K R V S L S V Y L G E F F D I H L F V N G T V T Q G D Q R V S M P Y A S K G L Y L E T |    |    |    |     | VWF_H_sapiens      |
| 73 | I G D F Q N G K R V S L S V Y L G E F F D I H L F V N G T V T Q G D Q R V S M P Y A S K G L Y L E T |    |    |    |     | VWF_P_troglodytes  |
| 73 | I G D F Q N G K R V S L S V Y L G E F F D I H L F V N G T V T Q G D Q R V S M P Y A S K G L Y L E T |    |    |    |     | VWF_G_gorilla      |
| 73 | I G D F Q N G K R V S L S V Y L G E F F D I H L F V N G T V T Q G D Q R V S M P Y A S K G L Y L E T |    |    |    |     | VWF_P_abelii       |
| 73 | I G D F Q N G K R V S L S V Y L G E F F D I H L F V N G T V T Q G D Q R V S M P Y A S K G L Y L E T |    |    |    |     | VWF_M_mulatta      |
| 73 | I G D F Q N G K R V S L S V Y L G E F F D I H L F V N G T V T Q G D Q R V S M P Y A S K G L Y L E T |    |    |    |     | VWF_C_jacchus      |
| 73 | L G D F Q N G K R V S L S V Y L G E F F D I H V F V N G T V M Q G G Q S V S V P Y A S S G L Y L E T |    |    |    |     | VWF_L_africana     |
| 73 | I G G F Q N G R R V S L S V Y L G E F F D I H L F V N G T A L Q G T Q I I A M P Y A S N G L Y L E I |    |    |    |     | VWF_A_melanoleuca  |
| 73 | I G G F Q N G K R V S L S V Y L G E F F D I H L F V N G T M L Q G T Q S I S M P Y A S N G L Y L E A |    |    |    |     | VWF_C_lupus        |
| 73 | I G D F Q N G K R V S L S V Y L G E F F D I H L F V N G T V L Q G N Q N I S M P Y A S N G L Y L E T |    |    |    |     | VWF_F_catus        |
| 73 | I G A F Q N G K R V S L S V Y L G E F F D I H L F V N G T V L Q G D Q S V S M P Y A S K G L Y L E T |    |    |    |     | VWF_E_caballus     |
| 73 | I G D F Q N G K R M S L S V Y L G E F F D I H L F V N G T V L Q G D Q S V S M P Y A S K G L Y L E T |    |    |    |     | VWF_P_vampyrus     |
| 73 | V G D F Q G G R R M G L S V Y L G E F F D I H V F V N G T V L Q G G Q H V S M P Y A T R G L Y L E T |    |    |    |     | VWF_B_taurus       |
| 73 | I G D F Q D G K R V S L S V Y L G E F F D I H V F V N G T V L Q G D Q R V S M P Y T S K G L Y L E T |    |    |    |     | VWF_T_truncatus    |
| 73 | I G D F Q D G K R V G L S V Y L G E F F D I H V F V N G T V L Q G D Q S I S T P Y A S K G L Y L E S |    |    |    |     | VWF_S_scrofa       |
| 72 | L G N F Q N G K R V S L S V Y L G E F F D I H L F V N G T V I Q G G Q R V S M P Y A S K G L Y L E T |    |    |    |     | VWF_D_novemcinctus |
| 76 | L G N F Q N G N R V S L S V Y L G E F F D I H L F V N G T A M Q G A Q R V S M P Y A S Q G L Y L E T |    |    |    |     | VWF_O_cuniculus    |
| 73 | L G N F Q N G E R V G L S V Y L G E F F D I H L F V N G T V V Q G D Q R I S V P Y A S K G L Y L E T |    |    |    |     | VWF_C_porcellus    |
| 73 | L G N F Q D G K R M S L S V Y L G E F F D I H L F A N G T V T Q G D Q S I S M P Y A S Q G L Y L E R |    |    |    |     | VWF_M_musculus     |
| 73 | L G N F Q D G K R V G L S V Y L G E F F D I H L F A N G T V M Q G D Q S I S M P Y A S K G L Y V E H |    |    |    |     | VWF_R_norvegicus   |
| 68 | L G D F E N G K R K S L S V Y L G E F F D I H L F I N G T V T Q G D Q R I S I P Y A S K G L Y L E M |    |    |    |     | VWF_M_domesticus   |
| 70 | L G N Y K D G E K T G F S V Y L G E Y F N L H F L L G G S V M Q E D K R V S I P F A S N G I F I E K |    |    |    |     | VWF_G_gallus       |
| 71 | L G D Y Q D G D K I G F S L Y L G E Y F S L R L S L D G V M Q E E K R V S I P F A S N G I F I E R   |    |    |    |     | VWF_T_guttata      |
| 68 | L G N Y E N G K R T S L T L Y L G E Y F D V H L F L D G T V T L S D K R I P V P Y A S N G I F V E N |    |    |    |     | VWF_A_carolinensis |
| 72 | L A D Y R N G K K S V S L Y L G E Y F D I H L F L D G T A T Q G E K H I S M P Y A S N G I F L E S   |    |    |    |     | VWF_X_tropicalis   |
| 67 | L G D F S H G K R K G V T V F L G E M F E L H L S V D G T L S Q G A E R L P L P Y A S S S V F A G Y |    |    |    |     | VWF_D_erio         |
| 63 | L G D F V N G K R T G V T L F L G D A F E L H L S V D G R L S Q G E K K L P V P F A S H A V F V G S |    |    |    |     | VWF_G_aculeatus    |
| 65 | L G D F H N G K R T G V T L F L G D A F E L H L S V D G F L S Q R E K R L T L P Y A S H A V F A G S |    |    |    |     | VWF_O_latipes      |
| 72 | L A D L V G G K R T G V T V F L G D A F E L R L S V D G Q L S Q G D E R L S L P H A S H G V F V G T |    |    |    |     | VWF_T_nigroviridis |
| 63 | L G D F V D G K R T G V T L F L G D A F E L H L S V D G Q L S Q G D K R L S L P H A S H G V F V G T |    |    |    |     | VWF_T_rubripes     |

. . G . . . . . G . . . . . D . . . . . N . T C G L C G . . N . . . . D . All Match Human  
 E . G . . K . . . . . G F . . . I D . . . . . N . . . . . N . T C G L C G . . N . . . . D . 28/30 Match Human  
 E A G Y Y K L S S E A Y G F V A R I D G S G N F Q V L L S D R Y F N K T C G L C G N F N I F A E D D Majority

|     | 110             | 120                                                                                 | 130                | 140 | 150 |  |
|-----|-----------------|-------------------------------------------------------------------------------------|--------------------|-----|-----|--|
| 123 | E A G Y Y K L S | G E A Y G F V A R I D G S G N F Q V L L S D R Y F N K T C G L C G N F N I F A E D D | VWF_H_sapiens      |     |     |  |
| 123 | E A G Y Y K L S | G E A Y G F V A R I D G S G N F Q V L L S D R Y F N K T C G L C G N F N I F A E D D | VWF_P_troglodytes  |     |     |  |
| 123 | E A G Y Y K L S | G E A Y G F V A R I D G S G N F Q V L L S D R Y F N K T C G L C G N F N I F A E D D | VWF_G_gorilla      |     |     |  |
| 123 | E A G Y Y K L S | G E A Y G F V A R I D G S G N F Q V L L S D R Y F N K T C G L C G N F N I F A E D D | VWF_P_abelii       |     |     |  |
| 123 | E A G Y Y K L S | G E A Y G F V A R I D G S G N F Q V L L S D R Y F N K T C G L C G N F N I F A E D D | VWF_M_mulatta      |     |     |  |
| 123 | E A G Y Y K L S | G E A Y G F V A R I D G S G N F Q V L L S D R Y F N K T C G L C G N F N I F A E D D | VWF_C_jacchus      |     |     |  |
| 123 | E A G Y Y K L S | S E S Y G F V A R I D G S G N F Q V L L S D R Y F N K T C G L C G N F N I F A E D D | VWF_L_africana     |     |     |  |
| 123 | E A G Y Y K L S | S E A Y G F V A K I D S S G N F Q V L L S D R Y F N K T C G L C G N F N I F A E D D | VWF_A_melanoleuca  |     |     |  |
| 123 | E A G Y Y K L S | S E A Y G F V A R I D G N G N F Q V L L S D R Y F N K T C G L C G N F N I F A E D D | VWF_C_lupus        |     |     |  |
| 123 | E A G Y Y K L S | S E T H G F V A R I D G S G N F Q I L L S D R Y F N K T C G L C G N F N I F A E D D | VWF_F_catus        |     |     |  |
| 123 | E A G Y Y K L S | S E A Y G F V A R I D S G G N F Q V L L S D R Y F N K T C G L C G N F N I F A E D D | VWF_E_caballus     |     |     |  |
| 123 | E A G Y Y K L S | S E T Y G F V A R I D G S G N F Q V L L S D R Y F N K T C G L C G D F N I F A E D D | VWF_P_vampyrus     |     |     |  |
| 123 | E V G H H K L S | S E S Y G F V A R I D G S G N F Q I L L S D R H F N K T C G L C G D F N I F A E D D | VWF_B_taurus       |     |     |  |
| 123 | E A G Y Y K L S | S E A Y G F V A R I D G S G S F Q V L L S D R H F N K T C G L C G N F N I F A E D D | VWF_T_truncatus    |     |     |  |
| 123 | Q A G Y H T L S | S E A Y G F V A R I D G S G N F Q V L L S D R Y F N K T C G L C G D F N I F S E D D | VWF_S_scrofa       |     |     |  |
| 122 | E A G Y H K L S | S E A Y G F V A R I D G S G N F Q V L L S D R Y F N K T C G L C G N F N I F A E D D | VWF_D_novemcinctus |     |     |  |
| 126 | E A G Y H K L S | S E A Y G F V A R I D G G G S F E V L L S H R H S N R T C G L C G N F N I F A E D D | VWF_O_cuniculus    |     |     |  |
| 123 | E A G F Y K L S | S K A Y G F A V R I D S I G N F E V L L S D R F F N K T C G L C G D F N I F S E D D | VWF_C_porcellus    |     |     |  |
| 123 | E A G Y Y K L S | S E T F G F A A R I D G N G N F Q V L M S D R H F N K T C G L C G D F N I F A E D D | VWF_M_musculus     |     |     |  |
| 123 | E A G Y Y K I S | S E A F G F A A R I D G D G N F Q V L M S D R H F N K T C G L C G D F N I F A E D D | VWF_R_norvegicus   |     |     |  |
| 118 | E A G Y Y K L S | S E V Y G F V A K V D A D G N F Q L L L P E R H F N K T C G L C G N F N I F A E D D | VWF_M_domesticus   |     |     |  |
| 120 | E A G Y Y K I S | S N D Y G F V V K I D I S G N I Q I F L Q E K Y Y N K T C G L C G N F N K F A E D D | VWF_G_gallus       |     |     |  |
| 121 | E A G Y Y K I S | S D E H G F V V K I D A S G N I Q I F L Q E K H Y N K T C G L C G N F N K F L E D D | VWF_T_guttata      |     |     |  |
| 118 | E A G Y Y K L S | S E E H G L V V K A D I S G N I Q I F L A N S H Y N K T C G L C G N F N T F A E D D | VWF_A_carolinensis |     |     |  |
| 122 | E A G Y Y K L S | S Q E H G F M V K I D A S G N V Q V L P S K H F N K T C G L C G N Y N Q F A E D D   | VWF_X_tropicalis   |     |     |  |
| 117 | E L G Y V R L W | S E E F G F S I R I D P L H N I Q L T L E K R H S N Q T C G L C G N Y N Y L A E D E | VWF_D_eriio        |     |     |  |
| 113 | D L G F H K L W | S E E F G F A V T I D N A A N I A V T M T R H N A N R T C G L C G N F N S V S A D E | VWF_G_aculeatus    |     |     |  |
| 115 | E L G F Y K L W | S E E F G F T V T I D N A A N I A L T L S K H H A N R T C G L C G N F N A V T A D E | VWF_O_latipes      |     |     |  |
| 122 | E L G F Y K L W | S E E F G F S V T I D N A A N I A L T L T K H H A N H T C G L C G N F N A N S A D E | VWF_T_nigroviridis |     |     |  |
| 113 | E L G F Y K L S | S E E F G F T V T I D N A A N I A L T L T K H H A N H T C G L C G N F N T D S A D E | VWF_T_rubripes     |     |     |  |

. . . . E G . . . . . Y . F . N S W . . . . . C . R . . . . . C . . . . . All Match Human  
 . . . Q E G . L . . . . Y . F A N S W A . . . . . C . R . . . . P . . . C . . . . . 28/30 Match Human  
 F R T Q E G T L T S D P Y D F A N S W A L S S G E Q R C K R X S P P S S S C N I S S G E M Q K G L W Majority

|     | 160 | 170 | 180 | 190 | 200 |   |   |   |   |   |   |   |   |   |   |   |   |   |   |   |   |   |   |   |   |   |   |   |   |   |   |   |   |   |   |   |   |   |   |   |   |   |   |   |   |   |   |   |   |   |                    |               |
|-----|-----|-----|-----|-----|-----|---|---|---|---|---|---|---|---|---|---|---|---|---|---|---|---|---|---|---|---|---|---|---|---|---|---|---|---|---|---|---|---|---|---|---|---|---|---|---|---|---|---|---|---|---|--------------------|---------------|
| 173 | F   | M   | T   | Q   | E   | G | T | L | T | S | D | P | Y | D | F | A | N | S | W | A | L | S | S | G | E | Q | W | C | E | R | A | S | P | P | S | S | S | C | N | I | S | S | G | E | M | Q | K | G | L | W | VWF_H_sapiens      |               |
| 173 | F   | M   | T   | Q   | E   | G | T | L | T | S | D | P | Y | D | F | A | N | S | W | A | L | S | S | G | E | Q | W | C | E | R | A | S | P | P | S | S | S | C | N | I | S | S | G | E | M | Q | K | G | L | W | VWF_P_troglodytes  |               |
| 173 | F   | M   | T   | Q   | E   | G | T | L | T | S | D | P | Y | D | F | A | N | S | W | A | L | S | S | G | E | Q | W | C | E | R | V | S | P | P | S | S | S | C | N | I | S | S | G | E | M | Q | K | G | L | W | VWF_G_gorilla      |               |
| 173 | F   | M   | T   | Q   | E   | G | T | L | T | S | D | P | Y | D | F | A | N | S | W | A | L | S | S | G | E | Q | W | C | E | R | A | S | P | P | S | S | S | C | N | I | S | S | G | E | M | Q | K | G | L | W | VWF_P_abelii       |               |
| 173 | F   | M   | T   | Q   | E   | G | T | V | T | S | D | P | Y | D | F | A | N | S | W | A | L | S | S | G | E | Q | W | C | E | R | A | S | P | P | S | S | S | C | N | I | S | S | G | E | V | Q | K | G | L | W | VWF_M_mulatta      |               |
| 173 | F   | M   | T   | Q   | E   | G | T | L | T | S | D | P | Y | D | F | A | N | S | W | A | L | S | S | G | E | Q | W | C | E | R | A | S | P | P | S | S | G | S | C | N | I | S | S | G | E | M | Q | K | G | L | W                  | VWF_C_jacchus |
| 173 | F   | V   | T   | Q   | E   | G | T | L | T | S | D | P | Y | D | F | A | N | S | W | A | L | S | S | - | E | Q | R | C | K | R | A | S | P | P | S | S | P | C | N | I | S | F | G | E | M | Q | K | G | L | W | VWF_L_africana     |               |
| 173 | F   | R   | T   | Q   | E   | G | T | L | T | S | D | P | Y | D | F | A | N | S | W | A | M | S | S | G | E | K | R | C | K | R | V | Y | P | P | S | S | P | C | N | V | S | S | E | E | M | Q | Q | G | P | W | VWF_A_melanoleuca  |               |
| 173 | F   | R   | T   | Q   | E   | G | T | L | T | S | D | P | Y | D | F | A | N | S | W | A | L | S | S | G | E | Q | R | C | K | R | V | S | P | P | S | S | P | C | N | V | S | S | D | E | V | Q | Q | V | L | W | VWF_C_lupus        |               |
| 173 | F   | R   | T   | Q   | E   | G | T | L | T | S | D | P | Y | D | F | A | N | S | W | A | L | S | S | G | E | Q | Q | C | K | R | A | S | P | P | S | S | P | C | N | I | S | S | E | E | M | Q | K | G | L | W | VWF_F_catus        |               |
| 173 | F   | I   | T   | Q   | E   | G | T | L | T | S | D | P | Y | D | F | A | N | S | W | A | L | S | S | G | E | E | R | C | K | R | A | S | P | P | S | S | P | C | N | V | S | S | E | E | M | Q | K | D | M | W | VWF_E_caballus     |               |
| 173 | F   | R   | T   | Q   | E   | G | T | L | T | S | D | P | Y | E | F | A | N | S | W | A | L | S | S | G | E | Q | R | C | K | R | A | S | A | P | S | I | R | C | N | A | S | S | E | E | M | Q | K | G | P | W | VWF_P_vampyrus     |               |
| 173 | F   | R   | T   | Q   | E   | G | T | L | T | S | D | P | Y | D | F | A | N | S | W | A | L | S | S | G | E | Q | R | C | Q | R | A | S | P | P | S | S | S | C | N | V | S | S | - | E | L | Q | K | G | L | W | VWF_B_taurus       |               |
| 173 | F   | R   | T   | Q   | E   | G | T | L | T | S | D | P | Y | D | F | A | N | S | W | A | L | S | S | G | E | Q | R | C | Q | R | A | S | P | P | S | S | V | C | N | V | S | S | - | E | L | Q | K | G | L | W | VWF_T_truncatus    |               |
| 173 | F   | K   | T   | Q   | E   | G | T | L | T | S | D | P | Y | S | F | A | N | S | W | A | L | S | S | G | E | Q | H | C | Q | R | A | A | P | P | S | I | S | C | N | I | S | S | - | E | M | Q | K | G | L | W | VWF_S_scrofa       |               |
| 172 | F   | I   | T   | Q   | E   | G | T | L | T | N | D | P | Y | D | F | A | N | S | W | A | M | H | S | G | E | E | R | C | Q | R | A | S | P | P | S | S | P | C | N | S | S | S | G | E | T | Q | K | E | L | W | VWF_D_novemcinctus |               |
| 176 | F   | R   | T   | Q   | E   | G | T | L | T | S | D | P | Y | D | F | A | N | S | W | A | L | S | S | G | E | R | R | C | P | R | V | S | P | P | N | V | P | C | N | S | S | S | G | E | L | Q | T | A | L | W | VWF_O_cuniculus    |               |
| 173 | F   | R   | T   | Q   | E   | G | M | L | T | S | D | P | Y | D | F | A | N | S | W | A | L | S | S | G | K | Q | R | C | Q | R | A | S | P | P | S | I | S | C | N | N | S | S | E | D | M | Q | K | A | L | W | VWF_C_porcellus    |               |
| 173 | F   | R   | T   | Q   | E   | G | T | L | T | S | D | P | Y | D | F | A | N | S | W | A | L | S | S | E | E | Q | R | C | K | R | A | S | P | P | S | R | N | C | E | S | S | S | G | D | M | H | Q | A | M | W | VWF_M_musculus     |               |
| 173 | F   | R   | T   | Q   | E   | G | T | L | T | S | D | P | Y | D | F | A | N | S | W | A | L | S | S | E | N | Q | R | C | K | R | T | S | P | P | S | T | N | C | T | S | S | S | G | D | M | Q | Q | A | M | W | VWF_R_norvegicus   |               |
| 168 | F   | R   | T   | Q   | E   | G | T | L | T | S | D | P | Y | N | F | G | N | S | W | A | L | R | S | A | E | R | R | C | K | R | V | S | L | P | S | D | T | C | N | I | S | S | V | E | M | E | K | G | L | Q | VWF_M_domesticus   |               |
| 170 | F   | R   | T   | Q   | E   | G | T | L | V | G | N | S | Y | D | F | A | N | S | W | A | L | R | S | E | N | K | L | C | K | R | V | Q | T | P | S | S | M | C | N | V | S | S | D | I | A | E | E | N | V | M | VWF_G_gallus       |               |
| 171 | F   | R   | T   | R   | E   | G | T | L | V | G | N | S | Y | D | F | A | N | S | W | A | L | H | S | E | N | K | H | C | K | R | V | Q | T | P | S | N | T | C | N | I | S | S | D | M | A | E | K | G | V | L | VWF_T_guttata      |               |
| 168 | L   | M   | T   | Q   | E   | G | I | L | E | E | N | S | Y | H | F | A | N | S | W | A | M | N | N | E | E | K | K | C | R | R | V | A | P | P | N | Q | T | C | N | I | T | S | D | M | A | D | E | I | S | V | VWF_A_carolinensis |               |
| 172 | F   | M   | M   | Q   | E   | G | I | L | T | E | N | S | Y | D | F | A | N | S | W | A | L | H | G | G | A | R | R | C | R | R | T | Y | P | P | S | N | T | C | N | I | S | S | E | T | A | E | K | D | F | M | VWF_X_tropicalis   |               |
| 167 | Y   | S   | A   | Q   | E   | G | F | L | T | D | D | P | Y | D | F | A | N | S | W | A | M | K | G | A | D | E | P | C | K | R | V | L | P | P | S | Q | S | C | N | S | T | G | - | E | S | T | K | D | Q | M | VWF_D_eriio        |               |
| 163 | Y   | T   | A   | Q   | E   | G | F | L | T | E | N | S | Y | D | F | A | N | S | W | E | V | K | G | A | D | Q | S | C | R | R | V | S | D | P | S | L | S | C | D | S | T | - | - | R | K | S | S | A | V | L | VWF_G_aculeatus    |               |
| 165 | Y   | T   | A   | Q   | E   | G | L | L | T | E | D | S | Y | D | F | A | N | S | W | A | V | K | G | A | D | Q | S | C | R | R | V | S | N | P | S | K | S | C | N | S | T | - | - | K | G | T | E | A | I | L | VWF_O_latipes      |               |
| 172 | Y   | T   | A   | Q   | E   | G | F | L | T | E | D | S | Y | D | F | A | N | S | W | A | V | K | G | A | D | Q | F | C | Q | R | V | S | N | R | G | L | A | C | N | S | S | - | - | K | D | S | S | V | I | M | VWF_T_nigroviridis |               |
| 163 | Y   | T   | A   | Q   | E   | G | F | P | T | E | D | S | Y | D | F | A | N | S | W | A | V | K | G | A | D | Q | I | C | Q | R | V | S | N | H | G | L | S | C | N | G | S | - | - | K | D | S | S | L | I | L | VWF_T_rubripes     |               |

. . C . . . . . F . . C . . . V . . . . . C . . . . C . C . . . . . C . C . . . L E All Match Human  
 . . C . . L . . . . F . . C . . . V . P E . . . . L C . . . . C . C . . . . . C . C . . . L E 28/30 Match Human  
 E Q C Q L L K S A S V F A R C H P L V D P E P F V A L C E K T L C T C A Q - - G L E C P C P A L L E Majority

|     | 210                                                                                                 | 220 | 230 | 240 | 250 |                    |
|-----|-----------------------------------------------------------------------------------------------------|-----|-----|-----|-----|--------------------|
| 223 | E Q C Q L L K S T S V F A R C H P L V D P E P F V A L C E K T L C E C A G                           |     |     |     |     | VWF_H_sapiens      |
| 223 | E Q C Q L L K S T S V F A R C H P L V D P E P F V A L C E K T L C E C A G                           |     |     |     |     | VWF_P_troglodytes  |
| 223 | E Q C Q L L K S T S V F A R C H P L V D P E P F V A L C E K T L C E C A G                           |     |     |     |     | VWF_G_gorilla      |
| 223 | E Q C Q L L K S T S V F A R C H P L V D P E P F V A L C E K T L C E C A G                           |     |     |     |     | VWF_P_abelii       |
| 223 | E Q C Q L L K S T S V F A R C H P L V D P E P F V A L C E K T L C E C A G                           |     |     |     |     | VWF_M_mulatta      |
| 223 | E Q C Q L L K S T S V F A R C H P L V D P E P F V A L C E K T L C E C T E                           |     |     |     |     | VWF_C_jacchus      |
| 222 | E Q C Q L L T S A S A F A R C H P S V D P E P F M A L C E S T L C S C A Q                           |     |     |     |     | VWF_L_africana     |
| 223 | E Q C Q L L K S A S V F A R C H P L V D P E P F V A L C E R T L C T C A P                           |     |     |     |     | VWF_A_melanoleuca  |
| 223 | E Q C Q L L K S A S V F A R C H P L V D P E P F V A L C E R T L C T C V Q                           |     |     |     |     | VWF_C_lupus        |
| 223 | E Q C Q L L K S A S V F A R C H P L V D P E P F V A L C E K I L C T C A Q                           |     |     |     |     | VWF_F_catus        |
| 223 | E Q C Q L L K T V S V F A R C H P L V D P E P F V A L C E K A L C P C A Q                           |     |     |     |     | VWF_E_caballus     |
| 223 | E Q C Q L L K S A S V F A R C H P L V D P E P F V A L C E T T L C T C A Q                           |     |     |     |     | VWF_P_vampyrus     |
| 222 | E K C Q L L K T A S V F A R C H A L V D P E P F V A L C E R M L C A C A Q                           |     |     |     |     | VWF_B_taurus       |
| 222 | E Q C Q L L K S A S V F A R C H P L V D P E P F V A L C E R M L C T C D Q                           |     |     |     |     | VWF_T_truncatus    |
| 222 | E Q C Q L L K S A S V F A R C H P L V D P E P F V A L C E K M L C P C A Q                           |     |     |     |     | VWF_S_scrofa       |
| 222 | E Q C Q L L K G A S V F A R C H P L V D P E P F V A L C E K A L C R C A Q                           |     |     |     |     | VWF_D_novemcinctus |
| 226 | E Q C Q L L K S T S V F T R C H P L V D P E P F M A L C E R T S C T C I Q                           |     |     |     |     | VWF_O_cuniculus    |
| 223 | E Q C Q L L K S A S V F A R C H P L V N P E P F V A L C E M S L C S C T Q                           |     |     |     |     | VWF_C_porcellus    |
| 223 | E Q C Q L L K T A S V F A R C H P L V D P E S F V A L C E K I L C T C A T                           |     |     |     |     | VWF_M_musculus     |
| 223 | E Q C Q L L K T A S V F A R C H P L V D P E P F V A L C E K T L C T C V T                           |     |     |     |     | VWF_R_norvegicus   |
| 218 | E R C Q I L K S S S V F A Q C H P L V D P E P F I A L C E K D L C H C A Q                           |     |     |     |     | VWF_M_domesticus   |
| 220 | E T C E L L R T S L T F A R C H H L V D P E P Y I H L C K K D I C S C T Y                           |     |     |     |     | VWF_G_gallus       |
| 221 | E T C Q L L S T S L T F S R C H H R V D P E P Y I S L C E R D I C A C P Q                           |     |     |     |     | VWF_T_guttata      |
| 218 | E N C Q L L R V S T V F S K C H H V V D P E Q F I N L C E E D M C R C A Q                           |     |     |     |     | VWF_A_carolinensis |
| 222 | Q R C Q M L K T S S A F M Q C H H L V D P D P Y I A I C E D D M C E C A E                           |     |     |     |     | VWF_X_tropicalis   |
| 216 | S A C E S M R S S V L F M H C A H L V D P A A F V S V C E S D V C H C S                             |     |     |     |     | VWF_D_eriio        |
| 211 | S S C S V L Q T S S V F L H C A H L V S S E A F L S L C Q E E A C H C D R G E A E D C Y C P I L L E |     |     |     |     | VWF_G_aculeatus    |
| 213 | S S C S V L K T S G V F L H C A H L V P P E A F L L L C Q A E A C H C N Q R D V E D C Y C P I L L E |     |     |     |     | VWF_O_latipes      |
| 220 | S G C S K L Q M S S V F L H C A H L V S P E A F L L L C Q Q E V C H C D Q K G G E D C Y C P F L L E |     |     |     |     | VWF_T_nigroviridis |
| 211 | S G C R K L Q T S S V F L R C A H L V S P E A F V L L C E Q E V C Y C D Q T D G E D C Y C P F L L E |     |     |     |     | VWF_T_rubripes     |

. . R . C . . . G . . . . W . . . . C . . . C P . G . . Y . . C . . . C . . . C . . . . . All Match Human  
 Y . R . C . . . G . . L . . W . . . . C . P . C P . G M . Y . . C . . . C . . . C . S L . . . E . 28/30 Match Human  
 Y A R T C A Q Q G M V L Y G W T D H S A C R P A C P A G M E Y K E C V S P C A R T C Q S L H I N E V Majority

|     | 260                                                                                                 | 270 | 280 | 290 | 300 |                    |
|-----|-----------------------------------------------------------------------------------------------------|-----|-----|-----|-----|--------------------|
| 271 | Y A R T C A Q E G M V L Y G W T D H S A C S P V C P A G M E Y R Q C V S P C A R T C Q S L H I N E M |     |     |     |     | VWF_H_sapiens      |
| 271 | Y A R T C A Q E G M V L Y G W T D H S A C S P V C P A G M E Y K Q C V S P C A R T C Q S L H I N E M |     |     |     |     | VWF_P_troglodytes  |
| 271 | Y A R T C A Q E G M V L Y G W T D H S A C S P V C P A G M E Y K Q C V S P C A R T C Q S L H V N E M |     |     |     |     | VWF_G_gorilla      |
| 271 | Y A R T C A Q E G M V L Y G W T D H S A C S P V C P A G M E Y K Q C V S P C A R T C Q S L H I N E V |     |     |     |     | VWF_P_abelii       |
| 271 | Y T R T C A Q E G M V L Y G W T D H S A C S P V C P A G M E Y K Q C V S P C A R T C Q S L H I N E V |     |     |     |     | VWF_M_mulatta      |
| 271 | Y A R T C A Q E G M V L Y G W T N H G A C S P V C P A G M E Y K Q C V S P C T R T C Q S L H I N E V |     |     |     |     | VWF_C_jacchus      |
| 270 | Y T R A C A H Q G V R L D G W T D H T T C Q P V C P A G M E Y K Q C V S P C T R T C Q S L H I N E V |     |     |     |     | VWF_L_africana     |
| 271 | Y A R A C A Q Q G M V L Y G W T D H S A C R P A C P A G M E Y K E C V S P C T R T C Q S L Q V Q A V |     |     |     |     | VWF_A_melanoleuca  |
| 271 | Y A R A C A Q Q G V V L Y G W T D H S V C R P A C P A G M E Y K E C V S P C T R T C Q S L H V K E V |     |     |     |     | VWF_C_lupus        |
| 271 | Y A R A C A Q Q G M V L Y G W T D H S A C R P A C P A G M E Y K E C V S P C A R T C Q S L H V K E V |     |     |     |     | VWF_F_catus        |
| 271 | Y A R A C A Q Q G M V L Y G W T D H S A C R P A C P A G M E Y K E C V S P C T R T C Q S L H I N E V |     |     |     |     | VWF_E_caballus     |
| 271 | Y A R A C A H Q G M V L Y G W T V H S E C R P A C P A G M E Y K E C V S P C T R N C Q S L H I N E V |     |     |     |     | VWF_P_vampyrus     |
| 270 | Y A R A C A K Q G M L L Y G W A D H S S C R P D C P A G M E Y K E C V S P C H R T C R S L S I T E V |     |     |     |     | VWF_B_taurus       |
| 270 | Y A R A C A Q Q G M L L Y G W T D H S S C R P D C P A G M E Y K A C V S P C P R D C R S L H V S E V |     |     |     |     | VWF_T_truncatus    |
| 270 | Y A R A C A Q Q G M L L Y G W M D H S L C R P D C P A G M E Y R E C V S P C T R T C Q S L H I N E V |     |     |     |     | VWF_S_scrofa       |
| 270 | Y A R A C A Q Q G M V L D G W T Q H S A C R P A C P A G M K Y K E C V S P C T S N C Q S L H I S E V |     |     |     |     | VWF_D_novemcinctus |
| 274 | Y A R A C A Q Q G L V L Y G W T D H S T C R P A C P A G M E Y K E C V S P C T R T C Q S L H I A E V |     |     |     |     | VWF_O_cuniculus    |
| 271 | Y A R T C A Q E G I V L Y G W M D H S T C R P A C P A G M E Y K E C V S P C A R T C Q S L H V N A V |     |     |     |     | VWF_C_porcellus    |
| 271 | Y A R T C A Q E G M V L Y G W T D H S A C R P A C P A G M E Y K E C V S P C P R T C Q S L S I N E V |     |     |     |     | VWF_M_musculus     |
| 271 | Y A R T C A Q E G M V L Y G W A D H S A C R P A C P A G M E Y K E C V S P C T R T C Q S L P I N E V |     |     |     |     | VWF_R_norvegicus   |
| 266 | Y A R N C A H R G M V L N D W T H D S K C W P A C P T G M E Y K E C V F P C A R T C Q S L H I N E V |     |     |     |     | VWF_M_domesticus   |
| 268 | Y A R N C A H E G V I L D G W S Q E S S C K P R C P V G M E Y K A C I S P C A K T C Q S L N I N E V |     |     |     |     | VWF_G_gallus       |
| 269 | Y A R S C A H Q G V I L E G W P E E S S C R P R C P V G M E Y K E C V S P C A K T C Q S L N I N E V |     |     |     |     | VWF_T_guttata      |
| 266 | Y A R T C A Q H G V I L E R W T A T S D C R I Q C P V G L E Y K E C T S P C A K T C Q S L N V N E V |     |     |     |     | VWF_A_carolinensis |
| 270 | Y A R T C A Q H G V I T S N W P T H T I C K P L C P F G M E Y N E C V S P C V K T C Q S L N I N E V |     |     |     |     | VWF_X_tropicalis   |
| 264 | Y S R A C A S R G I T L S N W H T Q S Q C S P K C P V G M E Y S D C T P T C S T S C Q N V N I Q E V |     |     |     |     | VWF_D_erio         |
| 261 | Y A R T C H A H G I L L R G W L Q E S Q C F P K C P I G M Q Y S E C T K S C S T T C H S L N I Q E V |     |     |     |     | VWF_G_aculeatus    |
| 263 | Y A R T C H A H G I L L H G W L E E S K C Y P K C P I G M Q Y S E C T K S C S T T C H S L N I Q E V |     |     |     |     | VWF_O_latipes      |
| 270 | F A R T C H A H G I L L H G W Q E E S Q C F P K C P I G M Q Y S E C T K S C S T T C H S L N I Q E V |     |     |     |     | VWF_T_nigroviridis |
| 261 | F T R T C H A H G V P L H G W Q E E S Q C F P K C P T G M Q Y S E C A K S C S T T C H S L N I Q E V |     |     |     |     | VWF_T_rubripes     |

C . . . C . D G C . C . . G . . L D . . . C . . . . C . C . H . G . . . . . . . . . . D C . . C All Match Human  
 C . . . C . D G C . C P . G . . L D . . . C . . . . C . C . H . G . . . P P G . . . . D C N . C 28/30 Match Human  
 C Q E Q C V D G C S C P E G Q L L D E G R C V E S X E C S C V H S G K R Y P P G A S L S Q D C N T C Majority

|     | 310 | 320 | 330 | 340 | 350 |   |   |   |   |   |   |   |   |   |   |   |   |   |   |   |   |   |   |   |   |   |   |   |   |   |   |   |   |   |   |   |   |   |   |   |   |   |   |   |   |   |   |   |   |               |                    |                    |
|-----|-----|-----|-----|-----|-----|---|---|---|---|---|---|---|---|---|---|---|---|---|---|---|---|---|---|---|---|---|---|---|---|---|---|---|---|---|---|---|---|---|---|---|---|---|---|---|---|---|---|---|---|---------------|--------------------|--------------------|
| 321 | C   | Q   | E   | R   | C   | V | D | G | C | S | C | P | E | G | Q | L | L | D | E | G | L | C | V | E | S | T | E | C | P | C | V | H | S | G | K | R | Y | P | P | G | T | S | L | S | R | D | C | N | T | C             | VWF_H_sapiens      |                    |
| 321 | C   | Q   | E   | R   | C   | V | D | G | C | S | C | P | E | G | Q | L | L | D | E | G | L | C | V | E | S | T | E | C | P | C | V | H | S | G | K | R | Y | P | P | G | A | S | L | S | R | D | C | N | T | C             | VWF_P_troglodytes  |                    |
| 321 | C   | Q   | E   | R   | C   | V | D | G | C | S | C | P | E | G | Q | L | L | D | E | G | L | C | V | E | S | T | E | C | P | C | V | H | S | G | K | R | Y | P | P | G | A | S | L | S | R | D | C | N | T | C             | VWF_G_gorilla      |                    |
| 321 | C   | Q   | E   | R   | C   | V | D | G | C | S | C | P | E | G | Q | L | L | D | E | G | L | C | M | E | S | T | K | C | P | C | M | H | S | G | K | R | Y | P | P | G | A | S | L | S | R | D | C | N | T | C             | VWF_P_abelii       |                    |
| 321 | C   | Q   | E   | R   | C   | V | D | G | C | S | C | P | E | G | Q | L | L | D | E | G | L | C | V | E | S | T | E | C | P | C | M | H | S | G | K | R | Y | P | P | G | A | S | L | S | R | D | C | N | T | C             | VWF_M_mulatta      |                    |
| 321 | C   | Q   | Q   | Q   | C   | V | D | G | C | S | C | P | E | G | Q | L | L | D | E | G | L | C | V | E | S | T | E | C | P | C | M | H | S | G | K | R | Y | P | P | G | T | N | L | S | Q | D | C | N | T | C             | VWF_C_jacchus      |                    |
| 320 | C   | Q   | E   | Q   | C   | V | D | G | C | S | C | P | E | G | Q | L | L | D | E | G | R | C | V | E | S | A | E | C | S | C | V | H | S | G | K | Q | Y | P | P | G | S | S | L | S | Q | D | C | N | T | C             | VWF_L_africana     |                    |
| 321 | C   | Q   | E   | Q   | C   | V | D | G | C | S | C | P | E | G | Q | L | L | D | E | G | R | C | V | G | S | A | D | C | S | C | V | H | A | G | Q | R | Y | P | P | G | T | S | L | S | Q | D | C | N | T | C             | VWF_A_melanoleuca  |                    |
| 321 | C   | Q   | E   | Q   | C   | V | D | G | C | S | C | P | E | G | Q | L | L | D | E | G | H | C | V | G | S | A | E | C | S | C | V | H | A | G | Q | R | Y | P | P | G | A | S | L | L | Q | D | C | H | T | C             | VWF_C_lupus        |                    |
| 321 | C   | Q   | E   | Q   | C   | V | D | G | C | S | C | P | E | G | Q | L | L | D | E | G | R | C | M | E | S | A | E | C | S | C | V | H | A | G | K | R | Y | P | P | G | A | S | L | S | Q | D | C | N | T | C             | VWF_F_catus        |                    |
| 321 | C   | Q   | E   | Q   | C   | V | D | G | C | S | C | P | E | G | Q | L | L | D | E | G | R | C | V | E | S | A | E | C | P | C | V | H | S | G | K | R | Y | P | P | G | A | S | L | S | Q | D | C | N | T | C             | VWF_E_caballus     |                    |
| 321 | C   | Q   | E   | Q   | C   | V | D | G | C | S | C | P | E | G | Q | L | L | D | E | G | R | C | V | E | S | T | E | C | S | C | V | H | S | G | K | R | Y | P | P | G | A | S | L | S | R | D | C | N | T | C             | VWF_P_vampyrus     |                    |
| 320 | C   | R   | E   | Q   | C   | V | D | G | C | S | C | P | E | G | Q | L | L | D | E | G | R | C | V | E | S | T | E | C | P | C | V | H | A | G | K | P | Y | P | P | G | A | S | L | S | R | D | C | N | T | C             | VWF_B_taurus       |                    |
| 320 | C   | Q   | Q   | Q   | C   | V | D | G | C | S | C | P | E | G | Q | L | L | D | E | G | R | C | V | K | S | A | E | C | S | C | V | H | S | G | K | R | Y | P | P | G | A | S | L | S | R | D | C | N | T | C             | VWF_T_truncatus    |                    |
| 320 | C   | Q   | E   | Q   | C   | V | D | G | C | S | C | P | E | G | Q | L | L | D | E | G | R | C | V | E | S | A | E | C | S | C | V | H | S | G | K | R | Y | P | P | G | A | S | L | S | R | D | C | N | T | C             | VWF_S_scrofa       |                    |
| 320 | C   | Q   | E   | Q   | C   | V | D | G | C | S | C | S | E | G | Q | V | L | D | E | G | R | C | V | E | R | A | E | C | S | C | V | H | A | G | K | R | Y | P | P | G | S | S | L | L | R | D | C | N | T | C             | VWF_D_novemcinctus |                    |
| 324 | C   | P   | E   | Q   | C   | V | D | G | C | S | C | P | E | G | Q | L | L | D | E | G | R | C | V | E | R | A | E | C | P | C | V | H | S | G | E | R | Y | P | P | G | A | S | L | S | R | D | C | N | T | C             | VWF_O_cuniculus    |                    |
| 321 | C   | R   | E   | Q   | C   | V | D | G | C | S | C | P | E | G | Q | L | L | D | E | G | R | C | V | E | N | A | E | C | S | C | V | H | A | G | K | R | Y | P | P | G | A | A | L | S | Q | D | C | N | T | C             | VWF_C_porcellus    |                    |
| 321 | C   | Q   | Q   | Q   | C   | V | D | G | C | S | C | P | E | G | E | L | L | D | E | D | R | C | V | Q | S | S | D | C | P | C | V | H | A | G | K | R | Y | P | P | G | T | S | L | S | Q | D | C | N | T | C             | VWF_M_musculus     |                    |
| 321 | C   | Q   | Q   | Q   | C   | V | D | G | C | G | C | P | E | G | E | L | L | D | E | D | R | C | V | Q | S | S | D | C | S | C | V | H | A | G | K | R | Y | P | P | G | T | S | L | P | Q | D | C | N | T | C             | VWF_R_norvegicus   |                    |
| 316 | C   | Q   | N   | Q   | C   | I | D | G | C | S | C | P | E | G | K | L | L | D | E | N | G | L | C | V | E | S | S | E | C | S | C | V | H | S | G | K | H | Y | P | P | G | S | S | I | S | Q | D | C | N | T             | C                  | VWF_M_domesticus   |
| 318 | C   | H   | G   | Q   | C   | I | D | G | C | S | C | P | E | G | K | L | L | D | E | R | C | V | E | S | S | D | C | S | C | I | H | S | G | R | H | Y | P | P | G | F | T | I | F | Q | D | C | N | S | C | VWF_G_gallus  |                    |                    |
| 319 | C   | H   | G   | Q   | C   | V | D | G | C | S | C | P | E | G | L | L | D | E | G | H | C | I | E | S | T | D | C | S | C | I | H | S | G | K | H | Y | P | P | G | F | T | I | S | Q | D | C | N | S | C | VWF_T_guttata |                    |                    |
| 316 | C   | Q   | E   | K   | C   | V | D | G | C | S | C | P | E | G | K | L | L | D | E | G | D | V | C | V | D | S | S | E | C | S | C | T | H | S | G | K | R | Y | A | P | G | S | S | V | Y | Q | D | C | N | S             | C                  | VWF_A_carolinensis |
| 320 | C   | Q   | E   | Q   | C   | I | D | G | C | S | C | P | D | G | K | V | L | D | E | G | R | C | I | P | V | F | E | C | S | C | I | H | S | G | K | R | Y | P | P | G | S | A | I | R | R | D | C | N | S | C             | VWF_X_tropicalis   |                    |
| 314 | C   | K   | E   | E   | C   | V | D | G | C | I | C | P | A | G | K | V | L | D | E | G | R | C | V | D | V | S | Q | C | S | C | T | H | A | G | R | R | Y | P | P | A | S | Y | I | S | Q | D | C | N | T | C             | VWF_D_eriio        |                    |
| 311 | C   | K   | E   | E   | C   | V | D | G | C | T | C | P | A | G | K | V | L | D | E | G | N | R | C | V | E | V | S | Q | C | S | C | V | H | M | G | R | H | F | P | P | G | S | T | I | S | Q | D | C | N | T             | C                  | VWF_G_aculeatus    |
| 313 | C   | K   | D   | E   | C   | M | D | G | C | T | C | P | A | G | K | V | L | D | E | G | N | R | C | V | E | V | S | E | C | S | C | T | H | M | G | R | H | F | P | P | G | S | T | V | S | Q | D | C | N | T             | C                  | VWF_O_latipes      |
| 320 | C   | K   | E   | D   | C   | V | D | G | C | R | C | P | V | G | K | V | L | D | E | G | T | R | C | V | E | V | S | Q | C | S | C | V | H | M | G | R | H | F | L | S | G | S | T | I | S | Q | D | C | N | T             | C                  | VWF_T_nigroviridis |
| 311 | C   | K   | E   | D   | C   | M | D | G | C | R | C | P | V | G | K | V | L | D | E | G | T | R | C | V | E | V | S | Q | C | S | C | V | H | M | G | R | H | F | P | P | G | S | S | I | S | Q | D | C | N | T             | C                  | VWF_T_rubripes     |



. C . . . . W . C . N . . C P G . C . . . G Q . H . K . F D . . . F T F . G . C . Y . . . . D . . . All Match Human  
 . C R . . . W . C . N E . C P G E C . . . G Q S H F K . F D . . . F T F . G . C . Y L . A . D C . . 28/30 Match Human  
 I C R N S L W I C S N E E C P G E C L V T G Q S H F K S F D N R Y F T F S G I C Q Y L L A R D C Q D Majority

|     | 360                                                                                                   | 370                                                   | 380 | 390 | 400 |                    |
|-----|-------------------------------------------------------------------------------------------------------|-------------------------------------------------------|-----|-----|-----|--------------------|
| 371 | I C R N S Q W I C S N E E C P G E C L V T G Q S                                                       | H F K S F D N R Y F T F S G I C Q Y L L A R D C Q D   |     |     |     | VWF_H_sapiens      |
| 371 | I C R N S Q W I C S N E E C P G E C L V T G Q S                                                       | H F K S F D N R Y F T F S G I C Q Y L L A R D C Q D   |     |     |     | VWF_P_troglodytes  |
| 371 | I C R N S Q W I C S N E E C P G E C L V T G Q S                                                       | H F K S F D N R Y F T F S G I C Q Y L L A R D C Q D   |     |     |     | VWF_G_gorilla      |
| 371 | I C R N S Q W I C S N E E C P G E C L V T G Q S                                                       | H F K S F D N R Y F T F S G I C Q Y L L A R D C Q D   |     |     |     | VWF_P_abelii       |
| 371 | I C R N S Q W I C S N E E C P G E C L V T G Q S                                                       | H F K S F D N R Y F T F S G I C Q Y L L A R D C Q D   |     |     |     | VWF_M_mulatta      |
| 371 | I C R N S Q W V C S N E E D C P G E C L V T G Q S                                                     | H F K S F D N K Y F T F S G I C Q Y L L A R D C Q D   |     |     |     | VWF_C_jacchus      |
| 370 | I C R N S L W I C S N E E C P G E C L V T G Q S                                                       | H F K S F D N R Y F T F S G I C Q Y L L A R D C Q D   |     |     |     | VWF_L_africana     |
| 371 | I C R N S L W I C S N E E C P G E C L V T G Q S                                                       | H F K S F D N R F F T F S G V C Q Y L L A Q D C Q D   |     |     |     | VWF_A_melanoleuca  |
| 371 | I C R N S L W I C S N E E C P G E C L V T G Q S                                                       | H F K S F D N R Y F T F S G V C H Y L L A Q D C Q D   |     |     |     | VWF_C_lupus        |
| 371 | I C R N S L W V C S N E E C P G E C L V T G Q S                                                       | H F K S F D N R Y F T F S G V C Q Y L L A Q D C Q D   |     |     |     | VWF_F_catus        |
| 371 | I C R N S L W I C S N E E C P G E C L V T G Q S                                                       | H F K S F D N R Y F T F S G V C Q Y L L A R D C Q D   |     |     |     | VWF_E_caballus     |
| 371 | I C R N S L W I C S N E E C P G E C L V T G Q S                                                       | H F K S F D D R Y F T F S G V C Q Y L L A Q D C E D   |     |     |     | VWF_P_vampyrus     |
| 370 | I C R N S Q W V C S N E E D C P G E C L I T G Q S                                                     | H F K S F D D R H F T F S G V C Q Y L L A Q D C Q D   |     |     |     | VWF_B_taurus       |
| 370 | I C R N S Q W V C S N E E C P G A C L I T G Q S                                                       | H F K S F D N R H H F T F S G I C Q Y L L A R D C Q D |     |     |     | VWF_T_truncatus    |
| 370 | I C R N S L W V C S N E E D C P G E C L V T G Q S                                                     | H F K S F D N R H F T F S G V C Q Y L L A R D C Q D   |     |     |     | VWF_S_scrofa       |
| 370 | I C R N S L W I C S N E E G C P G E C L V T G Q S                                                     | H F K S F D N R Y F T F S G I C Q Y L L T R D C Q D   |     |     |     | VWF_D_novemcinctus |
| 374 | I C R N S Q W V C S N E E C P G E C F V T G Q S                                                       | H F K S F D N R Y F T F S G V C Q Y L L A R D C W D   |     |     |     | VWF_O_cuniculus    |
| 371 | I C R N S L W I C S N E E G C P G E C L V T G Q A H F K S F D D R H F T F S G I C Q Y L L A Q D C Q D |                                                       |     |     |     | VWF_C_porcellus    |
| 371 | I C R N S L W I C S N E E C P G E C L V T G Q S                                                       | H F K S F D N R Y F T F S G I C Q Y L L A R D C E D   |     |     |     | VWF_M_musculus     |
| 371 | I C R H S L W I C S N E E C P G E C L V T G Q S                                                       | H F K S F D N R H F T F S G I C Q Y L L A R D C Q D   |     |     |     | VWF_R_norvegicus   |
| 366 | I C R N S L W I C S N E E C P G E C L V T G Q S                                                       | H F K S F D N K Y F T F S G I C Q Y L L A R D C Q D   |     |     |     | VWF_M_domesticus   |
| 368 | I C R H G I W I C S N G E C P G E C S I T G Q S                                                       | H F K S F D N K H F T F S G I C Q Y L F A K D C V E   |     |     |     | VWF_G_gallus       |
| 369 | I C R R G T W I C S N G E C P G E C S V T G Q S                                                       | H F K S F D N K Y F T F S G I C Q Y L F A K D C V E   |     |     |     | VWF_T_guttata      |
| 366 | I C R H G L W I C D N E L C P G E C F V T G Q S                                                       | H F K S F D N K H F T F S G I C H Y V F A R D C E E   |     |     |     | VWF_A_carolinensis |
| 370 | T C Q N G A W E C S N E D C P G E C F V T G Q S                                                       | H F K S F D N K H F T F S G I C Q Y L L A T D A M D   |     |     |     | VWF_X_tropicalis   |
| 364 | V C R H G S W E C T N E G C P G E C L V T G Q S                                                       | H Y K T F D N K F F T F S G I C H Y L L A K D C Q S   |     |     |     | VWF_D_erio         |
| 361 | V C R H G S W E C T N E G C P G E C L V V G Q S                                                       | H F K T F D N K F F T F T G H C Q Y L L A R D C T N   |     |     |     | VWF_G_aculeatus    |
| 363 | V C R H G S W E C T N E G C P G E C L V V G Q S                                                       | H F K S F D N K F F T F T G D C Q Y L L A K D C V N   |     |     |     | VWF_O_latipes      |
| 370 | V C R H G S W E C T N E G C P G E C L V V G Q S                                                       | H F K T F D S K F F T F T G R C H Y L L A R D C A D   |     |     |     | VWF_T_nigroviridis |
| 361 | V C R H G S W E C T N E G C P G E C L V V G Q S                                                       | H F K T F D N K F F T F T G R C Q Y L L S R D C V D   |     |     |     | VWF_T_rubripes     |

. . F S . . . . . Q C A . . . . A . C T . S . . . . . . . . . . . . . . . K H G . . . . . D All Match Human  
 . . F S . . I E . . Q C A D D . D A V C T R S . . . . . . . . . . . . . . . K L K H G . . . . . D 28/30 Match Human  
 H S F S I V I E T V Q C A D D P D A V C T R S V T V R L P G L H N S L V K L K H G G G V A M D G Q D Majority

|     | 410 |   |   |   |   |   |   |   |   |   | 420 |   |   |   |   |   |   |   |   |   | 430 |   |   |   |   |   |   |   |   |   | 440 |   |   |   |   |   |   |   |   |   | 450 |   |   |   |   |   |   |   |   |                |                    |                 |
|-----|-----|---|---|---|---|---|---|---|---|---|-----|---|---|---|---|---|---|---|---|---|-----|---|---|---|---|---|---|---|---|---|-----|---|---|---|---|---|---|---|---|---|-----|---|---|---|---|---|---|---|---|----------------|--------------------|-----------------|
| 421 | H   | S | F | S | I | V | I | E | T | V | Q   | C | A | D | D | R | D | A | V | C | T   | R | S | V | T | V | R | L | P | G | L   | H | N | S | L | V | K | L | K | H | G   | A | G | V | A | M | D | G | Q | D              | VWF_H_sapiens      |                 |
| 421 | H   | S | F | S | I | V | I | E | T | V | Q   | C | A | D | D | R | D | A | V | C | T   | R | S | V | T | V | R | L | R | G | L   | H | N | S | L | V | K | L | K | H | G   | A | G | V | A | M | D | G | Q | D              | VWF_P_troglodytes  |                 |
| 421 | H   | S | F | S | I | V | I | E | T | V | Q   | C | A | D | D | R | D | A | V | C | T   | R | S | V | T | L | R | L | P | G | L   | H | N | S | L | V | K | L | K | H | G   | G | G | V | A | M | D | G | Q | D              | VWF_G_gorilla      |                 |
| 421 | H   | S | F | S | I | V | I | E | T | V | Q   | C | A | D | D | R | D | A | V | C | T   | R | S | V | T | V | R | L | P | G | L   | Q | D | S | L | V | K | L | K | H | G   | G | G | V | A | M | D | G | Q | D              | VWF_P_abelii       |                 |
| 421 | H   | S | F | S | I | V | I | E | T | V | Q   | C | A | D | D | P | D | A | V | C | T   | R | S | V | T | V | R | L | P | G | L   | H | N | S | L | V | K | L | K | H | G   | G | G | V | A | M | D | G | Q | D              | VWF_M_mulatta      |                 |
| 421 | H   | S | F | S | I | V | I | E | T | V | Q   | C | A | D | D | P | D | A | V | C | T   | R | S | V | T | I | R | L | P | G | L   | H | N | S | L | V | K | L | K | H | G   | G | G | V | A | M | D | G | Q | D              | VWF_C_jacchus      |                 |
| 420 | H   | S | F | S | I | V | I | E | T | V | Q   | C | A | D | D | P | D | A | V | C | T   | R | S | A | T | I | R | L | P | L | L   | H | N | S | L | V | K | L | K | H | G   | G | G | V | A | I | N | G | Q | D              | VWF_L_africana     |                 |
| 421 | H   | T | F | S | V | V | I | E | T | V | Q   | C | A | D | D | P | D | A | V | C | T   | R | S | V | T | V | R | L | P | G | L   | H | N | S | L | V | K | L | K | H | G   | G | G | L | S | V | D | G | Q | D              | VWF_A_melanoleuca  |                 |
| 421 | H   | T | F | S | V | V | I | E | T | V | Q   | C | A | D | D | L | D | A | V | C | T   | R | S | V | T | V | R | L | P | G | H   | H | N | S | L | V | K | L | K | H | G   | G | G | V | S | M | D | G | Q | D              | VWF_C_lupus        |                 |
| 421 | H   | T | F | S | V | V | I | E | T | V | Q   | C | A | D | D | P | D | A | V | C | T   | R | S | V | T | V | R | L | P | R | L   | H | N | S | L | V | K | L | K | H | G   | G | G | V | S | M | D | G | Q | D              | VWF_F_catus        |                 |
| 421 | H   | S | F | S | I | V | I | E | T | V | Q   | C | A | D | D | P | D | A | V | C | T   | R | S | V | T | I | R | L | P | S | P   | H | N | S | L | V | R | L | K | H | G   | G | G | V | A | M | D | G | Q | D              | VWF_E_caballus     |                 |
| 421 | H   | S | F | S | I | V | I | E | T | V | Q   | C | A | D | D | P | D | A | V | C | T   | R | S | V | T | V | R | L | P | S | P   | H | N | S | L | V | K | L | K | H | G   | A | G | V | V | D | G | Q | D | VWF_P_vampyrus |                    |                 |
| 420 | H   | S | F | S | V | V | I | E | T | V | Q   | C | A | D | D | P | D | A | V | C | T   | R | S | V | T | V | R | L | P | S | P   | H | H | G | L | L | K | L | K | H | G   | G | G | V | A | L | D | G | Q | D              | VWF_B_taurus       |                 |
| 420 | H   | T | F | S | I | I | I | E | T | V | Q   | C | A | D | D | P | D | A | V | C | T   | R | S | V | T | V | R | L | P | G | Q   | H | R | N | V | V | K | L | K | H | G   | G | G | V | A | V | D | G | Q | D              | VWF_T_truncatus    |                 |
| 420 | H   | T | F | S | V | I | I | E | T | V | Q   | C | A | D | D | P | D | A | V | C | T   | R | S | V | T | V | R | L | P | S | P   | H | N | S | L | V | K | L | K | H | G   | G | G | V | A | M | D | G | W | D              | VWF_S_scrofa       |                 |
| 420 | H   | S | F | S | V | V | I | E | T | M | Q   | C | A | D | D | P | D | A | V | C | T   | R | S | V | T | V | R | L | P | S | L   | R | G | S | L | V | K | L | K | H | G   | G | G | V | A | M | D | G | Q | D              | VWF_D_novemcinctus |                 |
| 424 | D   | S | F | S | I | V | I | E | T | V | Q   | C | A | E | D | P | S | A | V | C | T   | R | S | V | T | A | R | L | P | G | L   | P | S | R | L | V | K | L | K | H | G   | G | S | V | A | M | D | G | Q | D              | VWF_O_cuniculus    |                 |
| 421 | H   | T | F | S | I | V | I | E | T | D | V   | Q | C | A | D | D | P | D | A | V | C   | T | R | S | V | T | L | R | L | A | A   | L | H | N | S | L | V | K | L | K | H   | G | G | G | V | A | V | D | G | Q              | D                  | VWF_C_porcellus |
| 421 | H   | T | F | S | I | V | I | E | T | M | Q   | C | A | D | D | P | D | A | V | C | T   | R | S | V | S | V | R | L | S | A | L   | H | N | S | L | V | K | L | K | H | G   | G | A | V | G | I | D | G | Q | D              | VWF_M_musculus     |                 |
| 421 | H   | S | F | S | I | V | I | E | T | M | Q   | C | A | D | D | P | D | A | V | C | T   | R | S | V | S | V | R | L | S | A | L   | H | N | S | L | M | K | L | K | H | G   | G | G | V | A | I | D | G | Q | D              | VWF_R_norvegicus   |                 |
| 416 | H   | S | F | S | I | V | I | E | T | V | Q   | C | A | N | D | P | D | A | V | C | T   | R | S | V | I | L | R | L | L | P | L   | H | N | S | V | V | K | L | K | H | G   | G | L | V | S | L | D | G | Q | D              | VWF_M_domesticus   |                 |
| 418 | N   | S | F | S | V | I | I | E | T | V | Q   | C | A | D | D | P | D | A | V | C | T   | R | S | A | S | V | R | I | Q | D | M   | E | N | S | L | I | K | M | K | H | G   | G | G | I | S | L | N | G | Q | D              | VWF_G_gallus       |                 |
| 419 | N   | S | F | S | V | I | T | E | T | V | Q   | C | A | D | D | P | D | A | V | C | T   | R | S | A | S | V | R | I | R | D | V   | D | N | S | I | I | K | M | K | H | G   | G | G | V | S | L | N | G | Q | D              | VWF_T_guttata      |                 |
| 416 | N   | K | F | S | V | F | I | E | T | V | Q   | C | A | D | D | P | D | A | V | C | T   | H | S | V | F | V | Q | L | Q | D | -   | E | N | Y | T | I | K | L | K | H | G   | G | G | I | S | L | N | G | Q | D              | VWF_A_carolinensis |                 |
| 420 | S   | T | F | S | V | T | I | E | T | V | Q   | C | A | D | D | I | D | A | V | C | T   | R | S | A | S | L | R | L | L | D | M   | H | N | I | T | I | K | L | K | H | G   | G | G | V | S | L | D | G | Q | D              | VWF_X_tropicalis   |                 |
| 414 | N   | S | F | S | A | V | I | E | T | A | Q   | C | A | D | D | Q | D | A | V | C | T   | R | S | I | T | L | R | F | K | D | L   | A | N | Q | T | V | H | L | K | H | G   | G | V | V | S | V | D | G | M | D              | VWF_D_erio         |                 |
| 411 | N   | G | F | S | V | I | I | E | N | V | Q   | C | A | D | D | Q | D | A | V | C | T   | R | S | V | T | L | S | L | S | L | E   | D | M | T | V | K | L | K | H | G | G   | V | V | S | V | N | S | M | D | VWF_G_acleatus |                    |                 |
| 413 | N   | E | F | S | V | I | I | E | N | V | Q   | C | A | D | N | Q | D | A | V | C | T   | R | S | V | T | L | S | L | P | S | L   | E | N | M | T | V | K | L | K | H | G   | G | V | V | S | V | N | N | M | D              | VWF_O_latipes      |                 |
| 420 | N   | S | F | S | V | I | I | E | N | V | Q   | C | A | D | D | E | D | A | V | C | T   | R | S | V | T | L | S | L | P | I | L   | E | D | M | T | I | K | L | K | H | G   | G | V | V | A | V | N | N | M | D              | VWF_T_nigroviridis |                 |
| 411 | N   | S | F | S | V | I | I | E | N | V | Q   | C | A | D | D | E | V | A | V | C | T   | R | S | V | T | L | S | L | P | S | L   | E | D | M | T | V | K | L | K | H | G   | G | L | V | S | V | N | S | M | D              | VWF_T_rubripes     |                 |





. G L C G N . N G . . . D D F . . . . G . . E . . . . . F G . . W . . . . . C . . . . . . . . . . C All Match Human  
 C G L C G N Y N G N . G D D F . . . . G L . E . . . . . F G . . W . . . . D C . . . . . . . . . . D P C 28/30 Match Human  
 C G L C G N Y N G N Q G D D F L T P S G L V E P L V E D F G N A W K L H G D C Q D L Q K Q H S D P C Majority

|     | 510                                                                                                 | 520 | 530 | 540 | 550 |                    |
|-----|-----------------------------------------------------------------------------------------------------|-----|-----|-----|-----|--------------------|
| 521 | C G L C G N Y N G N Q G D D F L T P S G L A E P R V E D F G N A W K L H G D C Q D L Q K Q H S D P C |     |     |     |     | VWF_H_sapiens      |
| 521 | C G L C G N Y N G N Q G D D F L T P S G L A E P R V E D F G N A W K L H G D C Q D L Q K Q H S D P C |     |     |     |     | VWF_P_troglodytes  |
| 521 | C G L C G N Y N G N Q G D D F L T P S G L A E P R V E D F G N A W K L H G D C Q D L Q K Q H S D P C |     |     |     |     | VWF_G_gorilla      |
| 521 | C G L C G N Y N G N Q G D D F L T P S G L A E P R V E D F G N A W K L H G D C Q D L Q K Q H S D P C |     |     |     |     | VWF_P_abelii       |
| 521 | C G L C G N Y N G N Q G D D F L T P S G L A E P R V E D F G N A W K L H A D C Q D L Q K Q H S D P C |     |     |     |     | VWF_M_mulatta      |
| 521 | C G L C G N Y N G N Q G D D F L T P S G L A E P R V E D F G N A W K L H G D C Q D L Q K Q H S D P C |     |     |     |     | VWF_C_jacchus      |
| 520 | C G L C G N Y N G N K G D D F L T P S G L V E P L V E D F G N S W K L H G D C Q D L Q K Q D S N P C |     |     |     |     | VWF_L_africana     |
| 521 | C G L C G N Y N G N R G D D F V T P A G L A E P L V E D F G N A W K L H G D C E N L Q K Q P S D P C |     |     |     |     | VWF_A_melanoleuca  |
| 521 | C G L C G N Y N G N R G D D F V T P A G L A E P L V E D F G N A W K L L G A C E N L Q K Q H R D P C |     |     |     |     | VWF_C_lupus        |
| 521 | C G L C G N Y N G N R G D D F V T P A G L A E P L V E D F G N A W K L H G D C E D L Q K Q H S D P C |     |     |     |     | VWF_F_catus        |
| 521 | C G L C G N Y N G N K G D D F L T P A G L V E A L V E A F G N S W K L R A D C E D L Q K Q H S D P C |     |     |     |     | VWF_E_caballus     |
| 521 | C G L C G N Y N G N K G D D F R T P A G L V E P L V E D F G N A W K L H G D C E D L R K Q P S D P C |     |     |     |     | VWF_P_vampyrus     |
| 520 | C G L C G N Y N G N Q R D D F L T P A G L V E P L V E H F G N S W K L R A D C E D L Q E Q P S D P C |     |     |     |     | VWF_B_taurus       |
| 520 | C G L C G N Y N G N Q G D D F L T P A G L V E P L V E H F G N S W K L R A D C E D L Q K Q P S D P C |     |     |     |     | VWF_T_truncatus    |
| 520 | C G L C G N Y N G N Q G D D F L T P A G L V E P L V E H F G N A W K L H G D C E D L R K Q P T D P C |     |     |     |     | VWF_S_scrofa       |
| 520 | C G L C G N Y N G N Q G D D F L T P A G L V E P L V E D F G N A W K L H G D C Q D L P K Q N S D P C |     |     |     |     | VWF_D_novemcinctus |
| 524 | C G L C G N F N G N R G D D F L S P A G L V E A L V E D F G N A W K L R G D C P D L R Q P L G D P C |     |     |     |     | VWF_O_cuniculus    |
| 521 | C G L C G N Y N G N K G D D F L T P T G L V E A L V A D F G N A W K L H G D C P D L Q M Q S S D P C |     |     |     |     | VWF_C_porcellus    |
| 521 | C G L C G N Y N G N K G D D F L T P A G L V E P L V V D F G N A W K L Q G D C S D L R R Q H S D P C |     |     |     |     | VWF_M_musculus     |
| 521 | C G L C G N Y N G N K G D D F L T P A G L V E P L V V D F G N A W K L Q G D C P D L H R Q H S D P C |     |     |     |     | VWF_R_norvegicus   |
| 514 | C G L C G N Y N G N K G D D F L T P S G L V E P L V E D F G N S W K L N G D C Q D L L K Q D S D P C |     |     |     |     | VWF_M_domesticus   |
| 518 | C G L C G N Y N G N Q G D D F L T P S G L V E V L L E D F G N S W K L N A D C Q D L L K Q D N D P C |     |     |     |     | VWF_G_gallus       |
| 519 | C G L C G N Y N G N R G D D F L T P S G M V E S L L E D F G N S W K L N A D C Q D L L K Q D S D P C |     |     |     |     | VWF_T_guttata      |
| 515 | C G L C G N Y N G D Q G D D F L T P S G L V E T R V E D F G N S W K L K G D C Q D L Q K Q D S N S C |     |     |     |     | VWF_A_carolinensis |
| 520 | S G L C G N Y N G N Q G D D F L T P S G L I E T S V E D F G N S W K L N G D C T D L M K Q D T D P C |     |     |     |     | VWF_X_tropicalis   |
| 514 | C G L C G N Y N G N Q G D D F L T V G G L V E T R V E A F G N S W K M N A D C D D V Q M Q N S D P C |     |     |     |     | VWF_D_erio         |
| 511 | C G L C G N F N G N Q G D D F L S G S G L V E A G P Q A F G Q S W R I N G D C E S T H K H E S D P C |     |     |     |     | VWF_G_aculeatus    |
| 513 | C G L C G N Y N G N Q G D D F M S D S G L V E T K P Q A F G Q A W K I N G D C E S T H K Y D P D P C |     |     |     |     | VWF_O_latipes      |
| 519 | C G L C G N Y N G N Q G D D F L S G S G L V E A G P Q S F G Q S W R I N G D C E S S H K Y G T D P C |     |     |     |     | VWF_T_nigroviridis |
| 510 | C G L C G N Y N G N Q G D D F L S G S G L V E A G P Q A F G Q S W R I N G D C D S G H K Y E N D P C |     |     |     |     | VWF_T_rubripes     |

. . . P . . . . . C . . . . . F . . C H . . . . . P . P . . . . . C . . D . C . C . . . . . All Match Human  
 . . N P . . . . . C . . . . . S . . F . . C H . . . . . P . P . . . . . C . . D V C . C . . . . . 28/30 Match Human  
 S L N P R L T R F A E E A C A V L T S X K F E A C H R A V S P L P Y L R N C R Y D V C S C S D G R D Majority

|     | 560                                                                                                 | 570 | 580 | 590 | 600 |                    |
|-----|-----------------------------------------------------------------------------------------------------|-----|-----|-----|-----|--------------------|
| 571 | A L N P R M T R F S E E A C A V L T S P T F E A C H R A V S P L P Y L R N C R Y D V C S C S D G R E |     |     |     |     | VWF_H_sapiens      |
| 571 | A L N P R M T R F S E E A C A V L T S P T F E A C H R A V S P L P Y L R N C R Y D V C S C S D G R E |     |     |     |     | VWF_P_troglodytes  |
| 571 | A L N P R M T R F S E E A C A V L T S P T F E A C H R A V S P L P Y L R N C R Y D V C S C S D G R E |     |     |     |     | VWF_G_gorilla      |
| 571 | A L N P R M T R F S E E A C A V L T S P T F E A C H R A V S P L P Y L R N C R Y D V C S C S D G R E |     |     |     |     | VWF_P_abelii       |
| 571 | A L N P R M T R F S E E A C A V L T S P T F E A C H R A V S P L P Y L R N C R Y D V C S C S D G R E |     |     |     |     | VWF_M_mulatta      |
| 571 | A L N P R M T R F A E E A C A V L T S P T F E A C H R A V S P L P Y L R N C R Y D V C S C S D G R E |     |     |     |     | VWF_C_jacchus      |
| 570 | N L N P R L T R F A E G A C A V L T S S K F E A C H H A V S P Q P Y L Q N C H Y D V C S C S D G R D |     |     |     |     | VWF_L_africana     |
| 571 | S L N P R L T R F A D E A C A L L T S S K F E A C H R A V G P L P Y V Q N C R Y D V C S C S D G R D |     |     |     |     | VWF_A_melanoleuca  |
| 571 | S L N P R Q A R F A E E A C A L L T S S K F E P C H R A V G P Q P Y V Q N C R Y D V C S C S D G R D |     |     |     |     | VWF_C_lupus        |
| 571 | S L N P R L T R F A E Q S C A L L T S S K F E A C H R V V N P L P Y V Q N C R Y D V C S C S D G K D |     |     |     |     | VWF_F_catus        |
| 571 | S L N P R L S R F A E E A C A L L T S P T F E A C H G A V G P G P Y L R N C R Y D V C S C S D G R D |     |     |     |     | VWF_E_caballus     |
| 571 | I L N P R L T K F A E E A C A L L T S S K F E A C H H A V A P L P Y L Q N C H Y D V C S C S N G R D |     |     |     |     | VWF_P_vampyrus     |
| 570 | S L N P R L T K F A D Q A C A I L T S P K F E A C H S A V S P L P Y L R N C R Y D V C A C S D G R D |     |     |     |     | VWF_B_taurus       |
| 570 | S L N P R L T R F A D E S C A I L T S P K F K A C H G T V G P L P Y L Q N C R Y D V C S C T N G R D |     |     |     |     | VWF_T_truncatus    |
| 570 | S F N P R L T R F A E E A C A I L T S P K F Q A C H D A V G P L P Y L Q N C H Y D V C S C S D G R D |     |     |     |     | VWF_S_scrofa       |
| 570 | N L N P R S T R F A A E A C A V L T S P T F A A C H R V V G P L P Y L R N C R Y D A C A C A D A G D |     |     |     |     | VWF_D_novemcinctus |
| 574 | S L N P R Q A R F A E E A C A L L T S S K F E A C H R A I S P L P F L Q N C R Y D V C S C P D G R E |     |     |     |     | VWF_O_cuniculus    |
| 571 | A L N P R L A R F A E E A C A L L T S S K F E A C H H A V S P L P Y L Q N C R Y D V C A C S D G R D |     |     |     |     | VWF_C_porcellus    |
| 571 | S L N P R L T R F A E E A C A L L T S S K F E A C H H A V S P L P Y L Q N C R Y D V C S C S D S R D |     |     |     |     | VWF_M_musculus     |
| 571 | S L N P R L T R F A E E A C A L L T S S K F E T C H H A V S P L P Y L Q N C R Y D V C S C A D S Q D |     |     |     |     | VWF_R_norvegicus   |
| 564 | N L N P R L T K Y A E E S C S L L T S S K F E P C H T V I S P T P Y L K N C H Y D V C S C S D G K D |     |     |     |     | VWF_M_domesticus   |
| 568 | N L N P H L A K Y A E E S C S V L I S S V F E R C H H E V S P T P Y V K N C H F D V C S C S S G K D |     |     |     |     | VWF_G_gallus       |
| 569 | N L N P H L A K Y A E D S C S V L M S P A F E P C H H E V C P T P Y V K N C R F D V C S C S S G K D |     |     |     |     | VWF_T_guttata      |
| 565 | S L S P Q L A K F A E N S C S L L L S L L F Q P C H D K V D P S P Y I K N C H F D V C S C S D G K D |     |     |     |     | VWF_A_carolinensis |
| 570 | N L N P K R A R F S E E V C F A L M D S A F Q S C H N E V N P A P Y L K N C R Y D V C S C S N G K E |     |     |     |     | VWF_X_tropicalis   |
| 564 | S L N P K R V R F A E E A C A V L L S M K F E P C H Y M V N P E P Y V K N C R Y D V C A C A D G Q E |     |     |     |     | VWF_D_erio         |
| 561 | A I N P K R V R F A E E A C S V M M S E V F S A C H Y L V N P G P F Q R F C R Y D V C A C E D G E E |     |     |     |     | VWF_G_aculeatus    |
| 563 | A I N P K R V R F A E E A C A V I M S D V F S P C H I L V N P S P F Q R F C R Y D V C A C G D G E K |     |     |     |     | VWF_O_latipes      |
| 569 | A V N P K R V R F A E E A C S V I L S D V F S A C H F L V N P G P F Q R F C R Y D V C A C A D S E E |     |     |     |     | VWF_T_nigroviridis |
| 560 | A V N P K R V R F A E E A C S V I L S D E F S A C H F L L N P G P F Q R I C R Y D V C A C V D S E E |     |     |     |     | VWF_T_rubripes     |

C . C . . . . . Y A . . C . . . . . . . . W R . . . . C . . . C . . . . . Y . . C G . . C . . T C . All Match Human  
 C L C . A . . . . Y A . A C . . . . . . . W R . . . . C . . . C . . G Q . Y . . C G . . C . . T C . 28/30 Match Human  
 C L C S A V A S Y A A A C A R R G V H I A W R E P G F C A L S C P Q G Q V Y L Q C G T P C N L T C R Majority

|     | 610                                                                                                 | 620 | 630 | 640 | 650 |                    |
|-----|-----------------------------------------------------------------------------------------------------|-----|-----|-----|-----|--------------------|
| 621 | C L C G A L A S Y A A A C A G R G V R V A W R E P G R C E L N C P K G Q V Y L Q C G T P C N L T C R |     |     |     |     | VWF_H_sapiens      |
| 621 | C L C G A L A S Y A A A C A G R G V S V A W R E P G R C E L N C P K G Q V Y L Q C G T P C N L T C R |     |     |     |     | VWF_P_troglodytes  |
| 621 | C L C G A L A S Y A A A C A G R G V R V A W R E P G R C E L N C P K G Q V Y L Q C G T P C N L T C R |     |     |     |     | VWF_G_gorilla      |
| 621 | C L C G A L A S Y A A A C A G R G V R V A W R E P G R C E L N C P K G Q V Y L Q C G T P C N L T C R |     |     |     |     | VWF_P_abelii       |
| 621 | C L C G A L A S Y A A A C A G R G V R V A W R E P G R C E L K C P K G Q V Y L Q C G T P C N L T C R |     |     |     |     | VWF_M_mulatta      |
| 621 | C L C G A L A S Y A A A C A G R G V R I A W R E P G R C E L N C P K G Q V Y L Q C G T P C N L T C R |     |     |     |     | VWF_C_jacchus      |
| 620 | C L C N A V A S Y A A A C A R K G V I I A W R E P S F C A L S C P P D Q V Y L Q C G T P C N L T C R |     |     |     |     | VWF_L_africana     |
| 621 | C L C S A V A N Y A A A C A R K G V H I G W R E P S F C A L S C P Q G Q M Y L Q C G T P C N M T C R |     |     |     |     | VWF_A_melanoleuca  |
| 621 | C L C S A V A N Y A A A C A R R G V H I A W R E P G F C A L S C P Q G Q V Y L Q C G T P C N M T C R |     |     |     |     | VWF_C_lupus        |
| 621 | C L C S A V A N Y A A A C A R R G V H I G W R E P S F C A L N C P Q G Q V Y L Q C G T P C N M T C R |     |     |     |     | VWF_F_catus        |
| 621 | C L C G A V A N Y A A A C A R K G V H I G W R E P G F C A L S C P Q G Q V Y L Q C G T P C N R T C H |     |     |     |     | VWF_E_caballus     |
| 621 | C L C N A V A N Y A A A C A R K G V H V A W R E P S F C A L S C P Q G Q V Y L Q C G I P C N L T C R |     |     |     |     | VWF_P_vampyrus     |
| 620 | C L C D A V A N Y A A A C A R R G V H V G W R E P S F C A L S C T H G Q V Y Q Q C G T P C N L T C R |     |     |     |     | VWF_B_taurus       |
| 620 | C L C D A V A N Y A A A C A R S G V R I G W R E P S F C A L S C P R G Q V Y L Q C G T P C N L T C R |     |     |     |     | VWF_T_truncatus    |
| 620 | C L C D A V A T Y A A A C A R R G V H I G W R E P G F C A L S C P P G Q V Y L Q C G T P C N L T C R |     |     |     |     | VWF_S_scrofa       |
| 620 | C V C G A V A S Y A A A C A A K G V R V A W R R P G F C E L S C P Q G Q V Y L Q C G S P C N L T C R |     |     |     |     | VWF_D_novemcinctus |
| 624 | C L C S A V A S Y A A A C A G R G V H I A W R E P S F C A L S C P P G Q V Y L Q C G T P C N L T C R |     |     |     |     | VWF_O_cuniculus    |
| 621 | C L C S A V A S Y A A A C A G R G V H I G W R E P G L C A L S C P Q G Q V Y L Q C G T P C N L T C R |     |     |     |     | VWF_C_porcellus    |
| 621 | C L C N A V A N Y A A E C A R K G V H I G W R E P G F C A L G C P Q G Q V Y L Q C G N S C N L T C R |     |     |     |     | VWF_M_musculus     |
| 621 | C L C S A V A N Y A A A C A R K G V H I G W R E P D F C A L S C P Q G Q V Y L Q C G N S C N M T C R |     |     |     |     | VWF_R_norvegicus   |
| 614 | C L C A A V A S Y A S A C A R K G I L I E W R E P G F C G L S C P E G Q V Y Q Q C G T P C N Q T C R |     |     |     |     | VWF_M_domesticus   |
| 618 | C L C S S I A N Y A T A C A M K N V V V Q W R A P D F C S M T C P E G Q I Y Q Q C G T L C N Q T C R |     |     |     |     | VWF_G_gallus       |
| 619 | C L C S A I A N Y A A A C A R K N I L V E W R Q P D F C P M A C P E G Q V Y Q Q C G T P C N Q T C Q |     |     |     |     | VWF_T_guttata      |
| 615 | C L C A A V S T Y A L A C A R R N V L I N W R K L D F C A F R C P E G Q I Y Q Q C G S P C N Q T C R |     |     |     |     | VWF_A_carolinensis |
| 620 | C L C S A L S T Y A A A C S R K G I L I D W R T P E F C P I Q C S E G K I Y Q Q C G S P C N Q T C R |     |     |     |     | VWF_X_tropicalis   |
| 614 | C L C D A V S S Y A V A C A A R G V L V N W R S H G Y C E L T C P D A Q V Y E M C G S V C N Q T C R |     |     |     |     | VWF_D_erio         |
| 611 | C L C S A L S A Y A A A C T A R G V M L S W R S P S L C E L E C T G G Q A Y E A C G S V C D R T C R |     |     |     |     | VWF_G_aculeatus    |
| 613 | C L C S A L A A Y A A S C S A K G V L V N W R S A L L C E L E C S G G Q V Y E A C G T V C D R T C L |     |     |     |     | VWF_O_latipes      |
| 619 | C L C S A L S A Y A S A C A A R G V L L S W R S H S L C E M E C T G G Q V Y E T C G S V C E R T C R |     |     |     |     | VWF_T_nigroviridis |
| 610 | C L C T A L S A Y A A A C A A R G V L L S W R S H S L C E M K C T G G Q V Y E A C G S V C Q R T C R |     |     |     |     | VWF_T_rubripes     |

. L S . . . . . C . . . . . C . E G C . C P . G . . . . . C . . . . . C . C . . . G . . . . P All Match Human  
 . L S . . . . . C . . . . . C . E G C . C P . G . Y . . . . . C V . . . . . C . C . . D G . . . Q P 28/30 Match Human  
 S L S Y P D E E C N - - E V C L E G C F C P P G L Y L D E R G D C V P K A Q C P C Y Y D G E I F Q P Majority

|     | 660                                                                                                 | 670                                                                             | 680                | 690 | 700 |  |
|-----|-----------------------------------------------------------------------------------------------------|---------------------------------------------------------------------------------|--------------------|-----|-----|--|
| 671 | S L S Y P D E E C N                                                                                 | - - E A C L E G C F C P P G L Y M D E R G D C V P K A Q C P C Y Y D G E I F Q P | VWF_H_sapiens      |     |     |  |
| 671 | S L S Y P D E E C N                                                                                 | - - E A C L E G C F C P P G L Y M D E R G D C V P K A Q C P C Y Y D G E I F Q P | VWF_P_troglodytes  |     |     |  |
| 671 | S L S Y P D E E C N                                                                                 | - - E A C L E G C F C P P G L Y M D E R G D C V P K A Q C P C Y Y D G E I F Q P | VWF_G_gorilla      |     |     |  |
| 671 | S L S Y P D E E C N                                                                                 | - - E A C L E G C F C P P G L Y M D E R G D C V P K A Q C P C Y Y D G E I F Q P | VWF_P_abelii       |     |     |  |
| 671 | A L S Y P D E E C N                                                                                 | - - E A C L E G C F C P P G L Y M D E M G D C V P K A Q C P C Y Y D G E I F Q P | VWF_M_mulatta      |     |     |  |
| 671 | S L S Y P D E E C S                                                                                 | - - E D C L E G C F C P P G L Y M D E M G N C V P K A Q C P C Y Y D G E I F Q P | VWF_C_jacchus      |     |     |  |
| 670 | S L S Y P D E E D C N                                                                               | - - E V C L E G C F C P S G L Y L D E R G D C V P K A Q C P C Y Y D G E I F Q P | VWF_L_africana     |     |     |  |
| 671 | S L S Y P D E E D C E                                                                               | - - E V C S E G C F C P P G L Y L D E R G E C V P K A Q C P C Y Y D G E I F Q P | VWF_A_melanoleuca  |     |     |  |
| 671 | S L S Y P E E D C N                                                                                 | - - E V C L E G C F C P P G L Y L D E R G D C V P K A Q C P C Y Y D G E I F Q P | VWF_C_lupus        |     |     |  |
| 671 | S L S Y P D E E D C N                                                                               | - - E I C L E G C F C P A G L Y L D E R G H C V P K A Q C P C Y Y D G E I F Q P | VWF_F_catus        |     |     |  |
| 671 | S L S H P D E E C D                                                                                 | - - E V C L E G C F C P P G L Y L D E R G D C V P K A Q C P C Y Y D G E I F Q P | VWF_E_caballus     |     |     |  |
| 671 | S L S H P D E E C N                                                                                 | - - E V C L E G C F C P P G L Y L D E R G D C V P K A Q C P C Y Y D G E I F Q P | VWF_P_vampyrus     |     |     |  |
| 670 | S L S H P D E E C T                                                                                 | - - E V C L E G C F C P P G L F L D E T G S C V P K A Q C P C Y Y D G E I F Q P | VWF_B_taurus       |     |     |  |
| 670 | S L S Y P D E E C T                                                                                 | - - E V C L E G C F C P L G L Y L D E T G A C V P K A Q C P C Y Y D G E I F Q P | VWF_T_truncatus    |     |     |  |
| 670 | S L S Y P D E E C A                                                                                 | - - E D C L E G C F C P P G L Y L D G S G D C V P K A Q C P C Y H D G E I F Q P | VWF_S_scrofa       |     |     |  |
| 670 | S L S H P D E E C N                                                                                 | - - E V C L E G C F C P P G L Y L D E R G D C M P K A Q C P C Y Y D G E I F Q P | VWF_D_novemcinctus |     |     |  |
| 674 | S L S Y P D E E C A                                                                                 | - - E G C L E G C F C P P G L Y Q D E R G Q C V P K A Q C P C S Y D G E I F Q P | VWF_O_cuniculus    |     |     |  |
| 671 | S L S Y P D E E C N                                                                                 | - - E V C L E G C F C P P G L Y Q D E R G D C V P K A R C P C Y Y D G E I F Q P | VWF_C_porcellus    |     |     |  |
| 671 | S L S L P D E E C S                                                                                 | - - E V C L E G C Y C P P G L Y Q D E R G D C V P K A Q C P C Y H D G E L F Q P | VWF_M_musculus     |     |     |  |
| 671 | S L S L P D E E C S                                                                                 | - - E V C L E G C F C P P G L Y Q D E R G D C V P K A Q C P C Y H D G E L F Q P | VWF_R_norvegicus   |     |     |  |
| 664 | S L S Y P D M E C N                                                                                 | - - E I C L E G C F C P P G L Y T D E K R N C V P K A Q C P C Y Y D G E I F Q P | VWF_M_domesticus   |     |     |  |
| 668 | S L S Y P D E N C D                                                                                 | - - E F C M E G C Y C P P G H Y L D E S E K C V P K S Q C S C Y Y D G E I F Q P | VWF_G_gallus       |     |     |  |
| 669 | S L S Y P E E D C E                                                                                 | - - Q M C L E G C Y C P P G H Y L D E H E Q C V P K S Q C S C Y Y D G E I F Q P | VWF_T_guttata      |     |     |  |
| 665 | T L S Y P D T D C S                                                                                 | - - E I C M E G C Y C P D G L Y L D E Q G G C L P K S Q C P C Y Y D G E I F Q P | VWF_A_carolinensis |     |     |  |
| 670 | S L S H P D V D C R                                                                                 | - - E F C M E G C Y C P P G L Y T N E D G E C V P K S D C S C Y Y D G E L F Q P | VWF_X_tropicalis   |     |     |  |
| 664 | S L S L P D T G C D G                                                                               | - - V C E E G C F C P R G L F L S D A G E C V P P Q H C S C H H N G E I F E P   | VWF_D_eriio        |     |     |  |
| 661 | A L S G A E P G C L K E R V C E E G C Y C P A G K Y L S D F G E C V T A D L C T C M H D G Q L Y Q P | VWF_G_aculeatus                                                                 |                    |     |     |  |
| 663 | S L S G A E A G C E G E K V C E E G C F C P V G K Y L S P S G Q C V T A D L C P C L H D G Q L Y Q P | VWF_O_latipes                                                                   |                    |     |     |  |
| 669 | S L S G V E P E C N G E K A C E E G C F C P A G K Y L S D S G E C V A A E L C T C L H D G Q L Y Q P | VWF_T_nigroviridis                                                              |                    |     |     |  |
| 660 | S L S G L E P G C K G E K A C E E G C F C P A G K Y L S D S G E C V T A D L C T C L H D G Q L Y Q P | VWF_T_rubripes                                                                  |                    |     |     |  |

. D . . . . H . . . C . C E . G . M . C . . . . . R . . . . . All Match Human  
. D . . . . D H . . . C . C E . G . M H C . . . . . L . . . . . R . . . R S . . C 28/30 Match Human  
E D I F S D H H T M C Y C E D G F M H C T T S G A P G S L L P D A V L S S P - L S H R S K R S L S C Majority

|     | 710                                                                                                 | 720 | 730                   | 740 | 750 |                    |
|-----|-----------------------------------------------------------------------------------------------------|-----|-----------------------|-----|-----|--------------------|
| 719 | E D I F S D H H T M C Y C E D G F M H C T M S G V P G S L L P D A V L S S P                         | -   | L S H R S K R S L S C |     |     | VWF_H_sapiens      |
| 719 | E D I F S D H H T M C Y C E D G F M H C T M S G V P G S L L P D A V L S S P                         | -   | L S H R S K R S L S C |     |     | VWF_P_troglodytes  |
| 719 | E D I F S D H H T M C Y C E D G F M H C T M S G V P G S L L P D A V L S S P                         | -   | L S H R S K R S L S C |     |     | VWF_G_gorilla      |
| 719 | E D I F S D H H T M C Y C E D G F M H C T M S G V P G S L L P D A V L S S P                         | -   | L S H R S K R S L S C |     |     | VWF_P_abelii       |
| 719 | E D I F S D H H T M C Y C E D G F M H C T M S G V P G S L L P D A V L S S P                         | -   | L S H R S K R S L S C |     |     | VWF_M_mulatta      |
| 719 | E D I F S D H H T V C Y C E G G F M H C T M S E V P G S L L P D A V L S S P                         | -   | L S H R S K R S L S C |     |     | VWF_C_jacchus      |
| 718 | E D V F S D H H T M C Y C E D G F M H C T M S G V P G N L L P D V V L S S S                         | -   | L S H R X X X X X X   |     |     | VWF_L_africana     |
| 719 | E D I F S D H H T M C Y C E D G F M H C T T S G A P G S L L P D T M L G S P                         | -   | R S H R S K R S L S C |     |     | VWF_A_melanoleuca  |
| 719 | E D I F S D H H T M C Y C E D G F M H C T T S G G L G S L L P N P V L S S P                         | -   | R S H R S K R S L S C |     |     | VWF_C_lupus        |
| 719 | E D I F S D H H T T C Y C E D G F M H C T T S G A P G S L L P D T F L S S P                         | -   | L S H R S K R S L S C |     |     | VWF_F_catus        |
| 719 | E D I F S D H H T M C Y C E D G F M H C S T S G A P G S L L P D A V L S S P                         | -   | L S H R S K R S L S C |     |     | VWF_E_caballus     |
| 719 | E D I F S D H H T V C Y C E D G F M H C T T S G A P G S L L P Q T V L G S P                         | -   | L S H R S K R S L S C |     |     | VWF_P_vampyrus     |
| 718 | E D I F S D H H T M C Y C E D G F M H C S T S G A P G S L L P E A V L S S P                         | -   | L S H R S K R S L S C |     |     | VWF_B_taurus       |
| 718 | E D V F S D H H T M C Y C E D G F M H C S T S G A P G S L L P D S V L S S P                         | -   | L S H R S K R S L S C |     |     | VWF_T_truncatus    |
| 718 | E D I F S D H H T M C Y C E D G F M H C S R A G A P G S L Q P E V V L S S P                         | -   | L S H R S K R S L S C |     |     | VWF_S_scrofa       |
| 718 | E D V F S D H H T T C Y C E D G F M H C T T S G A P G S Q L L G A V F V S S P                       | -   | L S H R S K R S L F C |     |     | VWF_D_novemcinctus |
| 722 | Q D V F S D H H T M C Y C E D G F M H C T S S G A P G S L L P D T A L P - - -                       | -   | H R S K R S L S C     |     |     | VWF_O_cuniculus    |
| 719 | A D I F S D H H T M C Y C E D G F M H C T M G G A P G S L L - E V A L S S P                         | -   | L S H R S K R S L F C |     |     | VWF_C_porcellus    |
| 719 | A D I F S D H H T M C Y C E D G F M H C T T S G T L G S L L P D T V L S S P                         | -   | L S H R S K R S L S C |     |     | VWF_M_musculus     |
| 719 | A D I F S D H H T M C Y C E D G F M H C T T S G A S G S L L P N I V L S S P                         | -   | L S H R S K R S L S C |     |     | VWF_R_norvegicus   |
| 712 | E D I F S D H H T M C Y C E N G F M H C S T N G L P G G L L P D V I F D S H                         | -   | P S P R I K R S L S C |     |     | VWF_M_domesticus   |
| 716 | E D I F S D H Y T M C Y C E D G F M H C S K S K A P G A L L P D V F T D E K                         | -   | P S A R I K R S L T C |     |     | VWF_G_gallus       |
| 717 | E D V F S D H H S M C Y C E N G F M H C S T N R A P G A F L A D V F A D E R                         | -   | P S P R I K R S L T C |     |     | VWF_T_guttata      |
| 713 | D D V F S D H H T M C Y C E N G L M H C S S K R L P G A F L P D V S F Q H H                         | -   | P S A R V K R S L A C |     |     | VWF_A_carolinensis |
| 718 | D D V F S N H Y S M C Y C E N G L M H C S T S D V P S G Y F P E S F F N Q                           | -   | P P A R V K R S L D C |     |     | VWF_X_tropicalis   |
| 712 | N D M I G D H H S I C V C E S G S M H C T S N E A T G S T L S D L F F D E Q                         | -   | S P S R G R S L S C   |     |     | VWF_D_rerio        |
| 711 | N D V Y A D H S S I C H C E N G S M R C S S P E S N - T L L S D L F Y D D D P A P S R D R R S A Q C |     |                       |     |     | VWF_G_aculeatus    |
| 713 | N D V Y A D H T S I C Y C E N G S M R C S S S E V P - S L L S D L F Y D E D L G S T R E R R S A H C |     |                       |     |     | VWF_O_latipes      |
| 719 | N D V Y A D H N S I C Y C E K G A M H C S S P E T S - S S L S D L F Y D D D F P L S R V R R S V Q C |     |                       |     |     | VWF_T_nigroviridis |
| 710 | N D I Y A D H N S I C Q C E K G A M H C S S P E T S - A S L S D L F Y D D D F T P S R V R S A Q C   |     |                       |     |     | VWF_T_rubripes     |



. . . . . G . E C . . T C Q . . . L . C . . . C . . G C . C P . . . V R . All Match Human  
 . . P . . . . C . . . . . G . E C . . T C Q N . . L . C . S . . C . . G C . C P . G . V R . 28/30 Match Human  
 R P P M V K L V C P A D N P R A E G L E C A K T C Q N Y D L E C M S T G C V S G C L C P P G M V R H Majority

|     | 760                           | 770                                                                             | 780 | 790                | 800 |  |
|-----|-------------------------------|---------------------------------------------------------------------------------|-----|--------------------|-----|--|
| 768 | R P P M V K L V C P A D N L   | R A E G L E C T K T C Q N Y D L E C M S M G C V S G C L C P P G M V R           | H   | VWF_H_sapiens      |     |  |
| 768 | R P P M V K L V C P A D N L   | Q A E G L E C A K T C Q N Y D L E C M S M G C V S G C L C P P G M V R           | H   | VWF_P_troglodytes  |     |  |
| 768 | R P P M V K L V C P A D N L   | R A E G L E C A K T C Q N Y D L E C M S M G C V S G C L C P P G M V R           | H   | VWF_G_gorilla      |     |  |
| 768 | R P P M V K L V C P A D N P   | R A E G L E C A K T C Q N Y D L E C M S M G C V S G C L C P P G M V R           | H   | VWF_P_abelii       |     |  |
| 768 | R P P M V K L V C P A D N P   | R A E G L E C A K T C Q N Y D L E C M S M G C V S G C L C P P G M V R           | H   | VWF_M_mulatta      |     |  |
| 768 | R P P M V K L V C P A D N P   | R A E G L E C A K T C Q N Y D L E C M S M G C V S G C L C P P G M V R           | H   | VWF_C_jacchus      |     |  |
| 767 | X X X X X X X X X             | P A D N P R A E G L E C A K T C Q N Y D L E C M S T G C V S G C L C P P G M V R | H   | VWF_L_africana     |     |  |
| 768 | R P P M V K L V C P A D N P   | R A E G L E C A K T C Q N Y D L Q C M S T G C V S G C L C P P G M V R           | H   | VWF_A_melanoleuca  |     |  |
| 768 | R P P M V K L V C P A D N P   | R A E G L E C A K T C Q N Y D L Q C M S T G C V S G C L C P Q G M V R           | H   | VWF_C_lupus        |     |  |
| 768 | R P P M V K L V C P A D N P   | R A E G L E C A K T C Q N Y D L Q C M S T G C V S G C L C P P G M V R           | H   | VWF_F_catus        |     |  |
| 768 | R P P M V K L V C P A D N P   | R A E G L E C A K T C Q N Y D L E C M S M G C V S G C L C P P G M V R           | H   | VWF_E_caballus     |     |  |
| 768 | R P P M V K F V C P A D N P   | R A E G L E C A K T C Q N Y D L E C M S I G C V S G C L C P Q G M V R           | H   | VWF_P_vampyrus     |     |  |
| 767 | R P P M V K V V C P A D N P   | R A E G L E C T K T C Q N Y D L E C M S T G C V S G C L C P P G M V R           | H   | VWF_B_taurus       |     |  |
| 767 | Q P P M V K L V C P A D S P   | K A E G L E C A K T C Q N Y D L E C V S M G C V S G C L C P P G M V R           | Q   | VWF_T_truncatus    |     |  |
| 767 | R P P M V K L V C P A D N P   | R A E G L E C A K T C Q N Y D L E C V S T G C V S G C L C P P G M V R           | H   | VWF_S_scrofa       |     |  |
| 767 | R P P M V T L V C P A D N P   | R A Q G L E C A K T C Q N Y D L E C M S T G C V S G C L C P L D M V R           | H   | VWF_D_novemcinctus |     |  |
| 767 | R P P M V K F V C P P D N P   | R A E G L E C A K T C Q N Y D L E C V S A G C V S G C L C P P G M V R           | H   | VWF_O_cuniculus    |     |  |
| 767 | R A P M V K L V C P A D N P   | R A E G V E C A K T C Q N Y D L D C M S T G C V S G C L C P P G M V R           | H   | VWF_C_porcellus    |     |  |
| 768 | R P P M V K L V C P A D N P   | R A Q G L E C A K T C Q N Y D L E C M S L G C V S G C L C P P G M V R           | H   | VWF_M_musculus     |     |  |
| 768 | R P P M V K L V C P A D N P   | R A Q G L E C A K T C Q N Y D L E C M S L G C V S G C L C P P G M V R           | H   | VWF_R_norvegicus   |     |  |
| 761 | Q P P M V K F V C P V D N P   | Q A E G I E C T K T C Q N Y D L E C V S H G C V S G C L C P P G M V R           | H   | VWF_M_domesticus   |     |  |
| 765 | R S P M V T L I C P E N N P   | R A E G L E C A K T C Q N F D L E C I S H G C I S G C L C P K G M V R           | H   | VWF_G_gallus       |     |  |
| 766 | R F P M E K I I C P A D N P   | R A E G V E C T K T C Q N Y D L E C I S H G C V S G C L C P K G M V R           | H   | VWF_T_guttata      |     |  |
| 762 | R H P M T M L V C P A N D P   | R A K G V E C M K T C Q T L E L G C V S H G C V S G C I C P T G M V R           | H   | VWF_A_carolinensis |     |  |
| 766 | R P P L N K I I C P A D N P   | K A T G I E C A K T C Q N Y E L E C V S H G C I S G C T C P D G M V R           | H   | VWF_X_tropicalis   |     |  |
| 761 | P P P L Q R F E C E S A R - - | D A G I E C A K T C Q N L E L D C V S L G C V S G C M C P P G T V R             | Y   | VWF_D_erio         |     |  |
| 760 | P P P L V R T N C D G V - - - | G K G L E C A R T C Q N L D L P C V S L A C I P G C L C P P G T V R             | H   | VWF_G_aculeatus    |     |  |
| 762 | P P P L V R T E C G S G - - - | K K G L E C A R T C Q N L D L P C V S L S C I P G C L C P P D T V R             | H   | VWF_O_latipes      |     |  |
| 768 | A P G L I R L N C D T G - - - | E N G I E C A R T C Q N L D L P C V T T A C I P G C L C P P G T V R             | Y   | VWF_T_nigroviridis |     |  |
| 759 | A P P L I R S N C D V G - - - | E N G L E C A R T C Q N L D L P C V S L S C I P G C L C P P G T V R             | N   | VWF_T_rubripes     |     |  |

. . . C . . . . C P C . H . . . . . G . . . . . C N . C V C . . . . W . C . . . . C D . . C All Match Human  
 . . . C . . . . C P C . H . . . . Y . G . . . . C N T C V C . . R . W . C T . . . C D . . C 28/30 Match Human  
 E N R C V A L E R C P C F H Q G R E Y A P G E T V K I D C N T C V C R D R K W N C T D H V C D A T C Majority

|     | 810                         | 820                         | 830                           | 840             | 850 |                    |
|-----|-----------------------------|-----------------------------|-------------------------------|-----------------|-----|--------------------|
| 818 | E N R C V A L E R C P C F H | Q G K E Y A P G E T V K I G | C N T C V C R D R K W N C T D | H V C D A T C   |     | VWF_H_sapiens      |
| 818 | G N R C V A L E R C P C F H | Q G K E Y A P G E T V K I G | C N T C V C R D R K W N C T D | H V C D A T C   |     | VWF_P_troglodytes  |
| 818 | E N R C V A L E R C P C F H | Q G K E Y A P G E T V K I G | C N T C V C R D R K W N C T D | H V C D A T C   |     | VWF_G_gorilla      |
| 818 | E N R C V A L E R C P C F H | Q G K E Y A P G E T V K I G | C N T C V C R D R K W N C T D | H V C D A T C   |     | VWF_P_abelii       |
| 818 | E N R C V A L E R C P C L H | Q G K E Y A P G E A V K I D | C N T C V C R D R K W N C T D | H V C D A T C   |     | VWF_M_mulatta      |
| 818 | E N R C V A L E R C P C F H | Q G Q E Y A P G E T V K I D | C N T C V C R D R K W N C T D | H M C D A T C   |     | VWF_C_jacchus      |
| 817 | E N R C V A L E R C P C F H | Q G K E Y A P G E T V K I D | C N T C V C R D R K W N C T D | K V C D A T C   |     | VWF_L_africana     |
| 818 | E N R C V A L E R C P C F H | Q G R E Y A P G E T V T I D | C N T C V C R D R K W N C T D | H V C D A T C   |     | VWF_A_melanoleuca  |
| 818 | E N R C V A L E R C P C F H | Q G Q E Y A P G E T V K I D | C N T C V C R D R K W N C T D | H V C D A T C   |     | VWF_C_lupus        |
| 818 | E N R C V A L E R C P C F H | Q G R E Y A P G E T V K I D | C N T C V C R D R K W N C T D | H V C D A T C   |     | VWF_F_catus        |
| 818 | E N R C V A L E R C P C F H | Q G R E Y A P G E T V K I D | C N T C V C R D R K W N C T D | H V C D A T C   |     | VWF_E_caballus     |
| 818 | E N R C V A L E R C P C V H | Q G K E Y A P G E T V K I D | C N T C V C R D R K W N C T D | H V C D A T C   |     | VWF_P_vampyrus     |
| 817 | E N R C V A L E R C P C F H | Q G R E Y A P G D R V K V D | C N S C V C Q D R K W N C T D | H V C D A S C   |     | VWF_B_taurus       |
| 817 | D N R C V A L E R C P C F H | Q G R E Y R P G E T V K V D | C N T C V C R D R K W N C T D | H V C D A T C   |     | VWF_T_truncatus    |
| 817 | E N R C V A L Q R C P C F H | Q G R E Y A P G E T V K V D | C N T C V C R D R K W S C T D | H V C D A S C   |     | VWF_S_scrofa       |
| 817 | E N K C V A L E R C P C F H | Q G R E Y A P G E T V K M D | C N T C V C R D R K W N C T D | T V C D A T C   |     | VWF_D_novemcinctus |
| 817 | E N K C V A L E R C P C F H | Q G R E Y A P G E T V K M D | C N T C V C R D R K W N C T   | A H V C D A T C |     | VWF_O_cuniculus    |
| 817 | E N R C V A L E R C P C F H | Q G R E F A P G E T V K V G | C N T C V C G D R K W N C T D | H V C D A T C   |     | VWF_C_porcellus    |
| 818 | E N K C V A L E R C P C F H | Q G A E Y A P G D T V K I G | C N T C V C R E R K W N C T   | N H V C D A T C |     | VWF_M_musculus     |
| 818 | E N R C V A L E R C P C F H | Q G E A Y S P G D T V K I G | C N T C V C R D R R W N C T   | T H V C D A T C |     | VWF_R_norvegicus   |
| 811 | G N R C V A L E R C P C F H | K G K E Y A Q G E T V K I D | C N T C V C Q N R R W D C T D | M V C D A T C   |     | VWF_M_domesticus   |
| 815 | E N K C V A P E R C P C F H | N G R E Y A K G E T V T K D | C N T C V C R G R K W E C T   | K N I C D G T C |     | VWF_G_gallus       |
| 816 | E N K C V A P E R C P C F H | N G R E Y S K G E T V T K D | C N T C V C Q G R K W E C T   | K N L C D G T C |     | VWF_T_guttata      |
| 812 | G N K C I V P G K C P C F H | N G Q E Y S P G Q S V T L D | C N T C V C R G Q K W E C T   | E N I C D G T C |     | VWF_A_carolinensis |
| 816 | K S K C M F P Q R C P C F H | A G K E Y A P G S S V E I D | C N T C V C E N R K W K C T   | E N I C D A T C |     | VWF_X_tropicalis   |
| 809 | R K D C I P Q E Q C P C Y H | N S R P Y E S G Q S I T V D | C N T C V C E Q R Q W K C S   | E R V C D G V C |     | VWF_D_erio         |
| 807 | H R D C I A P E Q C P C Y H | N N R P F A A G Q T I S V D | C N T C V C E N R M W R C T   | E R A C D G V C |     | VWF_G_acleatus     |
| 809 | R R D C I A P E Q C P C Y H | N N R P Y A A G Q T I T T D | C N T C V C E N R K W R C T   | Q K L C D G V C |     | VWF_O_latipes      |
| 815 | R K N C I A P E Q C P C F H | N N R P Y A S G Q T I S V D | C N T C V C E N R R W R C T   | E K L C D G V C |     | VWF_T_nigroviridis |
| 806 | H K D C I A P E Q C P C Y H | N N R P Y T S G Q S I A V D | C N T C V C E N R K W R C T   | E K V C D G V C |     | VWF_T_rubripes     |





. . . . . C . . . . . G . . . . . S G . . . . All Match Human  
 . . . . . C . K . . . . . G . I . . . . . G . V . . . . . E . . . . S G . . . . 28/30 Match Human  
 S Y P S V K C K K R V T I L V E G G E I E L F D G E V N V K R P M K D E T H - F E V V E S G R Y I I Majority

|     | 910                                                                                                 | 920 | 930                   | 940 | 950 |                    |
|-----|-----------------------------------------------------------------------------------------------------|-----|-----------------------|-----|-----|--------------------|
| 915 | S H P S V K C K K R V T I L V E G G E I E L F D G E V N V K R P M K D E T H                         | -   | F E V V E S G R Y I I |     |     | VWF_H_sapiens      |
| 915 | S H P S V K C K K R V T I L V E G G E I E L F D G E V N V K R P M K D E T H                         | -   | F E V V E S G R Y I I |     |     | VWF_P_troglodytes  |
| 915 | S H P S V K C K K R V T I L V E G G E I E L F D G E A N V K R P M K D E T H                         | -   | F E V V E S G R Y I I |     |     | VWF_G_gorilla      |
| 915 | S H P S V K C E K R V T I L V E G G E I E L F D G E V N V K R P M K D E T H                         | -   | F E V V E S G R Y I I |     |     | VWF_P_abelii       |
| 915 | S H P S V K C K K H V T I L V E G G E I E L F D G E V N V K R P M K D E T H                         | -   | F E V V E S G R Y I I |     |     | VWF_M_mulatta      |
| 915 | S Y P S V K C K K R V T I L V E G G E I E L F D G E V N V Q R P M K D E T H                         | -   | F E V V E S G R Y I I |     |     | VWF_C_jacchus      |
| 914 | S S P S V K C K K R V T I L V E E G E I E L F D G E V N V K R P M K D E T H                         | -   | F E V M E S G R Y V I |     |     | VWF_L_africana     |
| 915 | S Y P S V K C K K R V T I L V E G G E I E L F D G E V N V K K P M E D E T H                         | -   | F E V V E S G Q Y V I |     |     | VWF_A_melanoleuca  |
| 915 | S Y P S V K C K K R I T I L V G G E I E L F D G E V N V M K P M M D E T H                           | -   | F E V V E S G H Y V I |     |     | VWF_C_lupus        |
| 915 | V Y P S V K C K K R V T I L V E E G E I E L F N G E V K V K R P M R D D S H                         | -   | F E V V E S G R Y I I |     |     | VWF_F_catus        |
| 915 | G Y P S V K C K K R V T V L V E G G E I E L F D G E V N V K R P M K D E T H                         | -   | F E V V E S G R Y I I |     |     | VWF_E_caballus     |
| 914 | S V P S L K C R K R I T I L V E G G E I E L F D G E V N V K T P M K D E T H                         | -   | F E V V E S G R Y I T |     |     | VWF_P_vampyrus     |
| 914 | G Y P S L K C R R R V T I L V E G G E I E L F D G E V S V K R S M K D E T Y                         | -   | F E V V E S G L Y I T |     |     | VWF_B_taurus       |
| 914 | G Y P S L K C R K R V T I L V D G G E I E L F D G E V M V K K P L K D E T H                         | -   | F E V V E S G R F I T |     |     | VWF_T_truncatus    |
| 914 | G Y P S A K C R R R V T I L V E G G E I E L L D G E V N V K R P M K D E T H                         | -   | F E V V E S G R Y V V |     |     | VWF_S_scrofa       |
| 914 | G Y P S V T C R K R V T I L V E G G E I E L F D G E V I V K R P L K E D T H                         | -   | F E V V E S G R Y V F |     |     | VWF_D_novemcinctus |
| 914 | S Y P S T E C K K R V T I L V E G G E I E L F D G E V N V K K P M K D E T H                         | -   | F E V V E S G R F F I |     |     | VWF_O_cuniculus    |
| 915 | S Y P S V K C R K R V T I L V D G G E L E L F D G E V N V K R P L R D E S H                         | -   | F E V V E S G R Y V I |     |     | VWF_C_porcellus    |
| 915 | T Y P S V K C K K R V T I L V D G G E I E L F N G E V N V K R P L K D E S H                         | -   | F E M V E S G Q Y V I |     |     | VWF_M_musculus     |
| 908 | S F S L M R C S K Q V T I L F E E G E I E L F D G E V N V K K P L K D E T H                         | -   | F E V V E S G R Y Y I |     |     | VWF_R_norvegicus   |
| 912 | S F T G E K C S K R V I I L Y K S G E I E L L N G N V N I K V F P K D S G D - L E V M K S G R Y Y I |     |                       |     |     | VWF_M_domesticus   |
| 913 | G F T G E K C T K K V I I L Y E G G E I E L F N G N V N I R V P P K G E N D N L D V I K S G R Y Y I |     |                       |     |     | VWF_G_gallus       |
| 912 | G F T G E K C T K R I T I L I D S G E I E L Y N G N V N I L T S P R E E A N - F E V L K S G R Y Y I |     |                       |     |     | VWF_T_guttata      |
| 913 | G F S G E K C T K R I T I L F R N G E I E L T N E Q I H I K K P L S D E T S - F D V L K S G N Y F I |     |                       |     |     | VWF_A_carolinensis |
| 906 | G I A G Y R C S K S I T V L Y M G G L I V M E H G E V R M K R P V L K E T E - V E I V R S G L Y Y I |     |                       |     |     | VWF_X_tropicalis   |
| 904 | G I V G H R C A K A I T V F Y Q G G L V V M Q H G E V T M K R P V L Q N S Q - V E I V K S G R F Y T |     |                       |     |     | VWF_D_eriio        |
| 906 | G I V G R R C A K A V T V F Y Q G G L I V M Q H G E V T M K K P V P Q S S Q - V E I I R S G Q F Y T |     |                       |     |     | VWF_G_aculeatus    |
| 912 | G L V G R R C K K A V T I F Y Q G G V I V M R D G E V K M K K P V M Q E S Q - V E I I R S G Q F Y T |     |                       |     |     | VWF_O_latipes      |
| 903 | G L I G R R C A K S V R I Y Y H G G L I V M E K G E V K M K K P V L Q S S Q - V E I I R S G Q F Y T |     |                       |     |     | VWF_T_nigroviridis |
|     |                                                                                                     |     |                       |     |     | VWF_T_rubripes     |

. L . . . . . W D . . . . . V C G L C G N F D . . . N N D . . . S . . . All Match Human  
 . L L . . . . S . . W D . . . . . V . . . . . V C G L C G N F D G . . N N D . . . S . . . 28/30 Match Human  
 L L L G K A L S V V W D R H L S I S V V L K Q T Y Q E Q V C G L C G N F D G I Q N N D L T S S N L Q Majority

|     | 960                         | 970                           | 980                     | 990                 | 1000 |                    |
|-----|-----------------------------|-------------------------------|-------------------------|---------------------|------|--------------------|
| 964 | L L L G K A L S V V W D R H | L S I S V V L K Q T Y Q E K   | V C G L C G N F D G I Q | N N D L T S S N L Q |      | VWF_H_sapiens      |
| 964 | L L L G K A L S V V W D R H | L S I S V V L K Q T Y Q E K   | V C G L C G N F D G I Q | N N D L T S S N L Q |      | VWF_P_troglodytes  |
| 964 | L L L G K A L S V V W D R H | L S I S V V L K Q T Y Q E K   | V C G L C G N F D G I Q | N N D L T S S N L Q |      | VWF_G_gorilla      |
| 964 | L L L G K A L S V V W D H H | L S I S V V L K Q T Y Q E K   | V C G L C G N F D G I Q | N N D L T S S N L Q |      | VWF_P_abelii       |
| 964 | L L L G K A I S V V W D R H | L S I S V V L K Q T Y Q E K   | V C G L C G N F D G I Q | N N D L T S S N L Q |      | VWF_M_mulatta      |
| 964 | L L L G K A L S V V W D R H | L S I S V V L K Q T Y Q E Q   | V C G L C G N F D G I Q | N N D L T S S N L Q |      | VWF_C_jacchus      |
| 963 | L L L G K A L S V V W D H H | L S I S V V L K Q T Y Q E Q   | V C G L C G N F D G I Q | N N D F T S S N L Q |      | VWF_L_africana     |
| 964 | L L L G K A L S V V W D H R | L S I S V S L K R T Y Q E R   | V C G L C G N F D G V Q | N N D F T S S S L Q |      | VWF_A_melanoleuca  |
| 964 | L L L G K A L S V V W D H R | L S I S V T L K R T Y Q E Q   | V C G L C G N F D G I Q | N N D F T S S S L Q |      | VWF_C_lupus        |
| 964 | L L L G K A L S V I W D H R | L S I S V A L K Q T Y Q E K   | V C G L C G N F D G I Q | N N D F T T S S L Q |      | VWF_F_catus        |
| 964 | L L V N K A L S V V W D H H | L G I S V V L K Q T Y Q E Q   | V C G L C G N F D G I Q | N N D F T S S R L Q |      | VWF_E_caballus     |
| 964 | L L L G K A L S V V W D R H | L V I S V V L K Q T F Q E Q   | V C G L C G N F D G I Q | N N D F T S S N L R |      | VWF_P_vampyrus     |
| 963 | V L L G K A L S V V W D G H | L A V S V F L K R T Y Q E R   | V C G L C G N F D G V Q | N N D L T S S S L Q |      | VWF_B_taurus       |
| 963 | V L L G K A L S V V W D R R | L G I S V F L K Q T Y Q E Q   | V C G L C G N F D G I Q | N N D L T S S S L Q |      | VWF_T_truncatus    |
| 963 | V L L G S G L S V V W D R H | L G I S V F L K Q T Y Q E Q   | V C G L C G N F D G V Q | N N D L T G S S L Q |      | VWF_S_scrofa       |
| 963 | L L L G K A L S V V W D R H | L F V S V V L K Q T Y Q E Q   | V C G L C G N F D G I Q | N N D L T S S N L Q |      | VWF_D_novemcinctus |
| 963 | L L L G G A L S V V W D R R | L G V S V V L K Q T Y Q D Q   | V C G L C G N F D G V Q | N N D F T S S N L Q |      | VWF_O_cuniculus    |
| 963 | L L L G R A L S V V W D R R | L V I S V V L K Q T F Q E Q   | V C G L C G N F D G I Q | N N D L T S S N L Q |      | VWF_C_porcellus    |
| 964 | L L L G Q A L S V V W D H H | L S I S V V L K H T Y Q E Q   | V C G L C G N F D G I Q | N N D F T T S S L Q |      | VWF_M_musculus     |
| 964 | L L L G Q G L S V V W D H R | L S I S V V L K Y T Y Q E H   | V C G L C G N F D G I Q | N N D F T S S S L Q |      | VWF_R_norvegicus   |
| 957 | L L L G K G I S L M W D R N | M G I S V I L K Q T Y Q E R   | V C G L C G N F D G N Q | N N D F T S S S L Q |      | VWF_M_domesticus   |
| 961 | I L L S K S I T V T W D L   | A M G V S V I L K A D F N D R | V C G L C G N F D G I Q | N N D L T S S N E H |      | VWF_G_gallus       |
| 963 | I L L G K S I S V T W D L   | A M G V S I I L K G N F K D Q | V C G L C G N F D G I Q | N N D L T S S S E H |      | VWF_T_guttata      |
| 961 | L L L S R L I S L I W D Q   | D M G I S V I L K E N Y K D Q | V C G L C G N F D D I Q | N N D L T S S R K Q |      | VWF_A_carolinensis |
| 962 | L L L G N Q M S V T W D K   | G M R V Y V T L K E T Y R D K | V C G L C G N F D G I E | N N D L I S S N N Q |      | VWF_X_tropicalis   |
| 955 | V L L G K H I S I T W D T   | G T R I S L Q I S G Q Y R G K | V C G L C G N F D G S Q | N N D L L S S S N Q |      | VWF_D_erio         |
| 953 | V L L G K H I S L T W D K   | G T S L L V H I S A T Y R G R | V C G L C G N F D G N V | N N D L V S S N N Q |      | VWF_G_aculeatus    |
| 955 | L L L G K H I S L S W D R   | G T R L L V H I S A A Y R G R | V C G L C G N F D G N V | N N D F M S S N N Q |      | VWF_O_latipes      |
| 961 | L L L G K Q I S I S W D K   | G T R L L V H I S S T Y R G R | V C G L C G N F D G N V | N N D L M S S N N Q |      | VWF_T_nigroviridis |
| 952 | L L L G K Q I S L S W D R   | G T R L L V H I S A Q Y R D R | V C G L C G N F D G N V | N N D L M S S N N Q |      | VWF_T_rubripes     |

. E . . . . . F G N S W . . . . . C A D . . . . . C . . . . . K . . . . . C . All Match Human  
 . E . . . . . F G N S W K V . . . . . C A D . . . . . - . . . . . C . N . . . . . K . . . . . V . . . . . C . 28/30 Match Human  
 V E E D P V D F G N S W K V S P Q C A D T R K V P - - L D S S P A T C H N N I M K Q T M V D S S C R Majority

|      | 1010                                                                                              | 1020                                 | 1030                                                                                    | 1040 | 1050 |                    |
|------|---------------------------------------------------------------------------------------------------|--------------------------------------|-----------------------------------------------------------------------------------------|------|------|--------------------|
| 1014 | V E E D P V D F G N S W K V S S Q C A D T R K V P                                                 | - -                                  | L D S S P A T C H N N I M K Q T M V D S S C R                                           |      |      | VWF_H_sapiens      |
| 1014 | V E E D P V D F G N S W K V S S Q C A D T R K V P                                                 | - -                                  | L D S S P A T C H N N I M K Q T M V D S S C R                                           |      |      | VWF_P_troglodytes  |
| 1014 | V E E D P V D F G N S W <b>R</b> V S S Q C A D T R K V P                                          | - -                                  | L D S S P A T C H N N I M K Q T M V D S S C R                                           |      |      | VWF_G_gorilla      |
| 1014 | V E E D P V D F G N S W K V S S Q C A D T R K V P                                                 | - -                                  | L D S S P A T C H N N I M K Q T M V D S S C R                                           |      |      | VWF_P_abelii       |
| 1014 | V E E D P V D F G N S W K V S S Q C A D T R K V P                                                 | - -                                  | L D S S P A T C H N N <b>L</b> M K Q T M V D S S C R                                    |      |      | VWF_M_mulatta      |
| 1014 | V E E D <b>A</b> V <b>N</b> F G N S W K V S S Q C A D T R <b>R</b> V P                            | - -                                  | L D S S P A T C <b>R</b> N N I M K Q T M V D S S C R                                    |      |      | VWF_C_jacchus      |
| 1013 | V E E D P V D F G N S W K V <b>N</b> P Q C A D T R K V P                                          | - -                                  | L D S S <b>L</b> A T C H N <b>D</b> I M K Q T M V D S S C R                             |      |      | VWF_L_africana     |
| 1014 | L E E D P V D F G N S W K V <b>N</b> P Q C A D T <b>G</b> K V P                                   | - -                                  | L D S S P A <b>V</b> C H N N <b>L</b> M K Q T M V D S S C R                             |      |      | VWF_A_melanoleuca  |
| 1014 | I E E D P V D F G N S W K V <b>N</b> P Q C A D T <b>K</b> K V P                                   | - -                                  | L D S S P A <b>V</b> C H N N I M K Q T M V D S S C R                                    |      |      | VWF_C_lupus        |
| 1014 | V E E D P V D F G N S W K V S P <b>R</b> I C A D T R K V P                                        | - -                                  | L D S S P A T C H <b>S</b> N <b>V</b> M K Q T M V D S S C R                             |      |      | VWF_F_catus        |
| 1014 | V E E <b>N</b> P V D F G N S W K V S P Q C A D T R K V P                                          | - -                                  | L D S S P A <b>S</b> C H N N I M K Q T <b>I</b> V D S S C R                             |      |      | VWF_E_caballus     |
| 1014 | V E E D P V D F G N S W K V S P Q C A D T R K V <b>L</b>                                          | - -                                  | L D S S P A T C H N N I <b>R</b> K Q T M V D S S C R                                    |      |      | VWF_P_vampyrus     |
| 1013 | V E E <b>N</b> P V D F G N S W K V S P Q C A D T <b>Q</b> K V <b>R</b>                            | - -                                  | L D S <b>A</b> P A <b>I</b> C H <b>D</b> N <b>V</b> M K Q T M V D S S C R               |      |      | VWF_B_taurus       |
| 1013 | V E E D P V D F G N S W K V S P <b>R</b> I C A D T <b>Q</b> K V P                                 | - -                                  | L D P S P A T C H N N <b>V</b> <b>L</b> K Q T M V D S S C <b>S</b>                      |      |      | VWF_T_truncatus    |
| 1013 | V E E D P V D F G N S W K V S P <b>R</b> I C A D T R K V P                                        | - -                                  | L D T S P A T C H N N <b>V</b> <b>M</b> K Q T M V D S S C R                             |      |      | VWF_S_scrofa       |
| 1013 | V E E D P V D F G N S W K V S P <b>R</b> I C A D T R K V P                                        | - -                                  | L D F S P <b>G</b> T C H <b>D</b> N I M K Q T M V D S S C R                             |      |      | VWF_D_novemcinctus |
| 1013 | V E <b>D</b> D P V <b>A</b> F G N S W K V <b>N</b> S Q C A D T <b>T</b> K V <b>L</b>              | - -                                  | L D L S P <b>V</b> T C <b>R</b> <b>D</b> N <b>V</b> <b>V</b> K Q T <b>L</b> V D S S C R |      |      | VWF_O_cuniculus    |
| 1013 | V E E <b>N</b> P V D F G N S W K V S P Q C A D T <b>S</b> K V <b>V</b>                            | - -                                  | L D V S P A T C H N N I <b>V</b> K Q T M V D S S C R                                    |      |      | VWF_C_porcellus    |
| 1014 | V E E D P V <b>N</b> F G N S W K V S S Q C A D T R K <b>L</b> S                                   | - -                                  | L D V S P A T C H N N I M K Q T M V D S <b>A</b> C R                                    |      |      | VWF_M_musculus     |
| 1014 | V E E D P <b>I</b> D F G N S W K V S P Q C A D T R K <b>L</b> S                                   | - -                                  | L D V S <b>L</b> A <b>A</b> C H N N I M K Q T M V D S S C R                             |      |      | VWF_R_norvegicus   |
| 1007 | L E M <b>G</b> P V D F G N S W K V <b>N</b> P Q C A D T <b>T</b> E <b>V</b> L                     | - -                                  | L D <b>G</b> A P A T C <b>R</b> N N <b>V</b> M K Q T M V D S S C R                      |      |      | VWF_M_domesticus   |
| 1011 | L E <b>V</b> D P V D F G N S W K V N T Y C A D V E <b>K</b> F N W E Q A L V S P L C               | N D N I L K Q V M V E T S C S        |                                                                                         |      |      | VWF_G_gallus       |
| 1013 | L E <b>V</b> D P V D F G N S W K V <b>N</b> S <b>R</b> C A D V V <b>K</b> P S L E E T L M S P L C | G G N I V K Q M M V E S S C S        |                                                                                         |      |      | VWF_T_guttata      |
| 1011 | L E <b>V</b> D P <b>N</b> D F G N S W K <b>I</b> N S Q C A D V <b>R</b> K - - E Q T L A S S L C   | N G N V V K Q V M V E T A C S        |                                                                                         |      |      | VWF_A_carolinensis |
| 1012 | I E M D P V <b>N</b> F G N S W K V N P L C A D A A <b>K</b> F G - - A V <b>S</b> P L S L C        | K D N <b>L</b> M K Q M A A E N A C N |                                                                                         |      |      | VWF_X_tropicalis   |
| 1005 | M E <b>V</b> D A A <b>D</b> F G N S W K V R P S C A D A V S <b>V</b> V - - S Q - - - - C          | S T D L V K L V T V E Q S C R        |                                                                                         |      |      | VWF_D_erio         |
| 1003 | L E <b>V</b> D S S <b>H</b> F G N S W K V V P S C A D V T Q T <b>P</b> - - A P - - - - C          | S N N I V K L V T V E Q S C R        |                                                                                         |      |      | VWF_G_aculeatus    |
| 1005 | L E <b>V</b> D S S <b>H</b> F G N S W K V I P S C A D V T Q I <b>P</b> - - <b>L</b> P - - - - C   | S D N I M K L V T V E Q S C R        |                                                                                         |      |      | VWF_O_latipes      |
| 1011 | L E <b>V</b> D S L <b>H</b> F G N S W K V V P S C A D V T Q <b>V</b> Q - - E P - - - - C          | S Q N I A K L V T V E Q S C R        |                                                                                         |      |      | VWF_T_nigroviridis |
| 1002 | L E <b>V</b> D S S <b>H</b> F G N S W K V S P S C A D V T Q I <b>P</b> - - P P - - - - C          | S <b>H</b> N I V K L V T V E Q S C R |                                                                                         |      |      | VWF_T_rubripes     |

. . . . . F . . C . . . . . P . . . . C . . . . C . C . S . . D C . C F C . . . A A Y A . . C All Match Human  
 . . . . . F . . C . . . V . . E P . . D . C . . . . C . C . S . G D C . C F C D . . A A Y A . . C 28/30 Match Human  
 I L T S D X F Q D C N K L V D P E P Y L D V C I Y D T C S C E S I G D C A C F C D T I A A Y A H V C Majority

|      | 1060 |   |   |   |   | 1070 |   |   |   |   | 1080 |   |   |   |   | 1090 |   |   |   |   | 1100 |   |   |   |   |   |   |   |   |   |   |   |   |   |   |   |   |   |   |   |   |   |   |   |   |   |   |   |   |   |                    |
|------|------|---|---|---|---|------|---|---|---|---|------|---|---|---|---|------|---|---|---|---|------|---|---|---|---|---|---|---|---|---|---|---|---|---|---|---|---|---|---|---|---|---|---|---|---|---|---|---|---|---|--------------------|
| 1062 | I    | L | T | S | D | V    | F | Q | D | C | N    | K | L | V | D | P    | E | P | Y | L | D    | V | C | I | Y | D | T | C | S | C | E | S | I | G | D | C | A | C | F | C | D | T | I | A | A | Y | A | H | V | C | VWF_H_sapiens      |
| 1062 | I    | L | T | S | D | V    | F | Q | D | C | N    | K | L | V | D | P    | E | P | Y | L | D    | V | C | I | Y | D | T | C | S | C | E | S | I | G | D | C | A | C | F | C | D | T | I | A | A | Y | A | H | V | C | VWF_P_troglodytes  |
| 1062 | I    | L | T | S | D | V    | F | Q | D | C | N    | K | L | V | D | P    | E | P | Y | L | D    | V | C | I | Y | D | T | C | S | C | E | S | I | G | D | C | A | C | F | C | D | T | I | A | A | Y | A | H | V | C | VWF_G_gorilla      |
| 1062 | I    | L | T | S | D | V    | F | Q | D | C | N    | K | L | V | D | P    | E | P | Y | L | D    | V | C | I | Y | D | T | C | S | C | E | S | I | G | D | C | A | C | F | C | D | T | I | A | A | Y | A | H | V | C | VWF_P_abelii       |
| 1062 | I    | L | T | S | D | V    | F | Q | D | C | N    | K | L | V | D | P    | E | P | F | L | D    | V | C | I | Y | D | T | C | S | C | E | S | I | G | D | C | A | C | F | C | D | T | I | A | A | Y | A | H | V | C | VWF_M_mulatta      |
| 1062 | I    | L | T | S | D | V    | F | Q | D | C | N    | K | L | V | D | P    | E | P | Y | L | D    | A | C | I | Y | D | T | C | S | C | E | S | I | G | D | C | T | C | F | C | D | T | V | A | A | Y | A | H | M | C | VWF_C_jacchus      |
| 1061 | I    | L | T | S | D | L    | F | Q | D | C | N    | K | L | V | D | P    | E | P | Y | L | D    | A | C | I | Y | D | T | C | S | C | E | S | I | G | D | C | T | C | F | C | D | T | I | A | A | Y | A | H | V | C | VWF_L_africana     |
| 1062 | I    | L | T | S | D | L    | F | Q | D | C | N    | R | L | V | D | P    | E | P | Y | L | D    | V | C | I | Y | D | T | C | S | C | E | S | I | G | D | C | A | C | F | C | D | T | I | A | A | Y | A | H | V | C | VWF_A_melanoleuca  |
| 1062 | I    | L | T | S | D | I    | F | Q | D | C | N    | R | L | V | D | P    | E | P | F | L | D    | I | C | I | Y | D | T | C | S | C | E | S | I | G | D | C | T | C | F | C | D | T | I | A | A | Y | A | H | V | C | VWF_C_lupus        |
| 1062 | I    | L | T | S | D | I    | F | Q | D | C | N    | R | L | V | D | P    | D | P | F | L | D    | V | C | I | Y | D | T | C | S | C | E | S | I | G | D | C | A | C | F | C | D | T | I | A | A | Y | A | H | V | C | VWF_F_catus        |
| 1062 | I    | L | T | S | D | L    | F | R | D | C | N    | K | L | V | D | P    | E | P | F | L | D    | V | C | I | Y | D | T | C | S | C | E | S | I | G | D | C | A | C | F | C | D | T | I | A | A | Y | A | H | V | C | VWF_E_caballus     |
| 1062 | I    | L | T | S | D | I    | F | Q | D | C | N    | K | L | V | D | P    | E | P | F | L | D    | V | C | I | Y | D | T | C | S | C | E | S | I | G | D | C | A | C | F | C | D | T | V | A | A | Y | A | H | V | C | VWF_P_vampyrus     |
| 1061 | V    | L | T | S | D | V    | F | R | E | C | N    | R | L | V | N | P    | E | P | Y | L | D    | V | C | I | Y | D | S | C | S | C | E | S | I | G | D | C | A | C | F | C | D | T | I | A | A | Y | A | H | E | C | VWF_B_taurus       |
| 1061 | I    | L | T | S | D | I    | F | Q | E | C | N    | R | L | V | D | P    | E | P | Y | L | D    | V | C | I | Y | D | T | C | S | C | E | S | V | G | D | C | A | C | F | C | D | A | I | A | A | Y | A | H | V | C | VWF_T_truncatus    |
| 1061 | I    | L | T | S | D | I    | F | Q | D | C | N    | K | L | V | D | P    | E | P | Y | L | D    | V | C | I | Y | D | T | C | S | C | E | S | I | G | D | C | A | C | F | C | D | T | I | A | A | Y | A | R | V | C | VWF_S_scrofa       |
| 1061 | I    | L | T | S | D | I    | F | Q | G | C | N    | K | L | V | D | P    | E | P | Y | L | D    | V | C | I | Y | D | S | C | S | C | E | S | I | G | D | C | A | C | F | C | D | T | I | A | A | Y | A | H | A | C | VWF_D_novemcinctus |
| 1061 | I    | L | T | S | H | I    | F | H | D | C | N    | K | L | V | D | P    | E | P | Y | L | D    | V | C | I | Y | D | T | C | S | C | E | S | I | G | D | C | V | C | F | C | D | T | I | A | A | Y | A | Q | V | C | VWF_O_cuniculus    |
| 1061 | I    | L | T | S | D | I    | F | Q | D | C | N    | K | L | V | D | P    | E | P | Y | L | D    | M | C | I | Y | D | T | C | S | C | E | S | I | G | D | C | A | C | F | C | D | T | I | A | A | Y | A | H | A | C | VWF_C_porcellus    |
| 1062 | I    | L | T | S | D | V    | F | Q | G | C | N    | R | L | V | D | P    | E | P | Y | L | D    | I | C | I | Y | D | T | C | S | C | E | S | I | G | D | C | A | C | F | C | D | T | I | A | A | Y | A | H | V | C | VWF_M_musculus     |
| 1062 | I    | L | T | S | D | I    | F | Q | G | C | N    | R | L | V | D | P    | E | P | Y | L | D    | I | C | I | Y | D | T | C | S | C | E | S | I | G | D | C | A | C | F | C | D | T | I | A | A | Y | A | H | V | C | VWF_R_norvegicus   |
| 1055 | I    | L | T | S | N | T    | F | R | E | C | N    | K | L | V | D | P    | E | P | Y | L | D    | I | C | I | Y | D | T | C | S | C | E | S | I | G | D | C | A | C | F | C | D | A | I | A | A | Y | A | H | V | C | VWF_M_domesticus   |
| 1061 | I    | L | S | G | G | L    | F | E | E | C | K    | K | L | V | N | P    | E | P | Y | I | D    | I | C | M | Y | D | T | C | A | C | E | S | I | G | D | C | A | C | F | C | D | A | I | A | A | Y | A | H | V | C | VWF_G_gallus       |
| 1063 | I    | L | S | G | S | V    | F | E | E | C | T    | K | L | V | N | P    | E | P | Y | I | D    | I | C | L | Y | D | T | C | A | C | E | S | V | G | D | C | A | C | F | C | D | A | V | A | A | Y | A | H | A | C | VWF_T_guttata      |
| 1058 | I    | L | T | S | E | L    | F | N | E | C | K    | K | M | I | D | P    | E | P | Y | M | D    | I | C | M | Y | D | T | C | A | C | E | S | I | G | D | C | A | C | F | C | D | A | I | A | A | Y | A | H | A | C | VWF_A_carolinensis |
| 1060 | I    | L | M | G | D | L    | F | A | E | C | A    | K | V | V | N | P    | E | P | Y | W | E    | I | C | T | Y | D | T | C | T | C | E | S | A | G | D | C | A | C | F | C | D | S | L | A | A | Y | A | H | V | C | VWF_X_tropicalis   |
| 1048 | V    | L | T | S | A | I    | F | R | D | C | N    | S | V | V | D | P    | E | P | Y | W | D    | I | C | T | Q | D | T | C | S | C | P | S | V | G | D | C | A | C | F | C | N | T | I | A | A | Y | A | H | E | C | VWF_D_erio         |
| 1046 | V    | I | N | G | P | L    | F | R | E | C | N    | R | V | V | D | A    | E | P | Y | V | D    | M | C | V | E | A | A | C | S | C | P | S | V | G | D | C | A | C | F | C | D | V | I | A | A | Y | A | Q | A | C | VWF_G_aculeatus    |
| 1048 | L    | M | S | G | P | L    | F | K | E | C | N    | T | Q | V | D | A    | E | P | Y | V | E    | M | C | V | E | A | A | C | S | C | P | S | V | G | D | C | A | C | F | C | D | V | V | A | A | Y | A | Q | A | C | VWF_O_latipes      |
| 1054 | V    | I | L | S | S | L    | F | K | E | C | N    | S | E | V | D | A    | E | P | Y | M | D    | M | C | V | E | A | A | C | S | C | S | S | V | D | D | C | A | C | F | C | D | V | I | A | A | Y | A | Q | V | C | VWF_T_nigroviridis |
| 1045 | V    | I | T | G | P | L    | F | K | E | C | N    | S | Q | V | D | A    | E | P | Y | V | D    | M | C | V | E | A | A | C | S | C | P | S | V | G | D | C | A | C | F | C | D | V | I | A | A | Y | A | Q | A | C | VWF_T_rubripes     |

. . . G . . . . W R . . . . C P . . C E . . N . . . . . . . . . . C . W R . N . C . . A C . . T C Q All Match Human  
 . . . G . . . . W R . . . L C P . . C E . . N . . . . . . . . . . C . W R Y N . C . . A C . . T C Q 28/30 Match Human  
 A Q H G K V V T W R T A T L C P Q S C E E R N L R E N G Y - - - E C E W R Y N S C A P A C P V T C Q Majority

|      | 1110                                                              | 1120 | 1130 | 1140 | 1150 |                    |
|------|-------------------------------------------------------------------|------|------|------|------|--------------------|
| 1112 | A Q H G K V V T W R T A T L C P Q S C E E R N L R E N G Y         |      |      |      |      | VWF_H_sapiens      |
| 1112 | A Q H G K V V T W R T A T L C P Q S C E E R N L R E N G Y         |      |      |      |      | VWF_P_troglodytes  |
| 1112 | A Q H G K V V T W R T A T L C P Q S C E E R N L R E N G Y         |      |      |      |      | VWF_G_gorilla      |
| 1112 | A Q H G K V V T W R T A T L C P Q S C E E R N L R E N G Y         |      |      |      |      | VWF_P_abelii       |
| 1112 | A Q H G K V V T W R T A T L C P Q S C E E R N L R E N G Y         |      |      |      |      | VWF_M_mulatta      |
| 1112 | A Q H G K V V T W R T T T L C P Q S C E E R N L R E S G Y         |      |      |      |      | VWF_C_jacchus      |
| 1111 | A Q H G K V V T W R T A T L C P Q S C E E R N L R E N G Y         |      |      |      |      | VWF_L_africana     |
| 1112 | A Q H G K V V A W R T A T L C P Q N C E E R N L H E N G Y         |      |      |      |      | VWF_A_melanoleuca  |
| 1112 | A Q H G K V V A W R T A T F C P Q N C E E R N L H E N G Y         |      |      |      |      | VWF_C_lupus        |
| 1112 | A Q H G K V V A W R T A T L C P Q S C E E R N L H E N G Y         |      |      |      |      | VWF_F_catus        |
| 1112 | A Q H G K V V T W R T A T L C P Q N C E E R N L R E N G Y         |      |      |      |      | VWF_E_caballus     |
| 1112 | A Q H G K V V T W R T A T L C P Q S C E D R N L R E N G Y         |      |      |      |      | VWF_P_vampyrus     |
| 1111 | A Q H G Q V V T W R T A T L C P Q N C E E R N L K E S G Y         |      |      |      |      | VWF_B_taurus       |
| 1111 | A R H G E V V A W R T P T L C P Q S C E E R N L R D S G Y         |      |      |      |      | VWF_T_truncatus    |
| 1111 | A Q H G K V V T W R T A T L C P Q N C E E R N L R E D G Y         |      |      |      |      | VWF_S_scrofa       |
| 1111 | A R H G Q V V N W R T A T L C P Q S C E E R N L R E N G Y         |      |      |      |      | VWF_D_novemcinctus |
| 1111 | A Q H G N V V N W R T A T L C P Q S C E E R N V R E S G Y         |      |      |      |      | VWF_O_cuniculus    |
| 1111 | A Q Q G K V V S W R T A T L C P Q S C E E R N L Q D S E H         |      |      |      |      | VWF_C_porcellus    |
| 1112 | A Q H G Q V V A W R T P T L C P Q S C E E K N V R E N G Y         |      |      |      |      | VWF_M_musculus     |
| 1112 | A Q H G Q V V A W R K P T L C P Q S C E E R N V R E N S Y         |      |      |      |      | VWF_R_norvegicus   |
| 1105 | A Q H G T V V N W R T D T L C P Q S C E E K N R H E N G H         |      |      |      |      | VWF_M_domesticus   |
| 1111 | A Q K G V I V H W R S P D L C P Q S C E N L N K Q E L D Y         |      |      |      |      | VWF_G_gallus       |
| 1113 | A Q K G V A V H W R S P T L C P Q S C E D L N N Q E L D Y         |      |      |      |      | VWF_T_guttata      |
| 1108 | A Q K G A V V H W R S P S L C P Q S C E D M N R Q E E G Y         |      |      |      |      | VWF_A_carolinensis |
| 1110 | A Q R G I N V H W R S S H L C P Q S C E E K N Q R D L D Y         |      |      |      |      | VWF_X_tropicalis   |
| 1098 | A Q K G L P V N W R S N D L C P L S C E D L N K E S G V Q         |      |      |      |      | VWF_D_erio         |
| 1096 | S E Q G V S I S W R S N E L C P I S C E E L N P R S L S A G E Q L |      |      |      |      | VWF_G_aculeatus    |
| 1098 | S E R G I S I S W R S N D L C P M S C E E L N P K I S G V G E E L |      |      |      |      | VWF_O_latipes      |
| 1104 | S E K G V T I S W R S N D L C P M S C E E M N P K N S V S G E E L |      |      |      |      | VWF_T_nigroviridis |
| 1095 | S E K G V S I S W R S N E L C P V S C E E M N P R N A V S G E E L |      |      |      |      | VWF_T_rubripes     |



H . . . . . C . . . . C V . . C . . . C P . . . . . C . . C . . . G . . . . . All Match Human  
 H P . P L . C . . . C V E G C H . . . C P . G . . L D E . . . . C . . . . C . . C . . . G . . . . . 28/30 Match Human  
 H P E P L A C P V Q C V E G C H A H C P P G K I L D E L L Q T C V D P E D C P V C E V A G R R L A S Majority

|      | 1160                                                                                                                                                        | 1170 | 1180 | 1190 | 1200 |                    |
|------|-------------------------------------------------------------------------------------------------------------------------------------------------------------|------|------|------|------|--------------------|
| 1159 | H P E P L A C P V Q C V E G C H A H C P P G K I L D E L L Q T C V D P E D C P V C E V A G R R F A S                                                         |      |      |      |      | VWF_H_sapiens      |
| 1159 | H P E P L A C P V Q C V E G C H A H C P P G K I L D E L L Q T C V D P <b>K</b> D C P V C E V A G R R F A S                                                  |      |      |      |      | VWF_P_troglodytes  |
| 1159 | H P E P L A C P V Q C V E G C H A H C P P G K I L D E L L Q T C V D P E D C P V C E V A G <b>W C</b> F A S                                                  |      |      |      |      | VWF_G_gorilla      |
| 1159 | H P E P L A C P V Q C V E G C H A H C P P G K I L D E L L Q T C V D P E D C P V C E V A G R R F A S                                                         |      |      |      |      | VWF_P_abelii       |
| 1159 | H P E P L <b>P</b> C P V Q C V E G C H A H C P P G K I L D E L L Q T C V <b>S</b> P E D C P V C E <b>A</b> A G R R F A S                                    |      |      |      |      | VWF_M_mulatta      |
| 1159 | H P E P L A C P V Q C V E G C H A H C P P G K I L D E L L Q T C V <b>N</b> P E D C P V C E V A G R R <b>L A S</b>                                           |      |      |      |      | VWF_C_jacchus      |
| 1158 | H P E P L A C P V Q C V E G C H A H C P P G K I L D E L L <b>E</b> T C V <b>N L</b> E D C P <b>M</b> C E V A G R R L <b>P S</b>                             |      |      |      |      | VWF_L_africana     |
| 1159 | H P E P L A C P V Q C V E G C H A H C P P G K I L D E L L Q T C <b>I</b> D P E D C P V C E V A G R R L <b>A P</b>                                           |      |      |      |      | VWF_A_melanoleuca  |
| 1159 | H P E P L A C P V Q C V E G C H A H C P P G K I L D E L L Q T C <b>I</b> D P E D C P V C E V A G R R L <b>A P</b>                                           |      |      |      |      | VWF_C_lupus        |
| 1159 | H P E P L A C P V Q C V E G C H A H C P P G K I L D E L L Q T C <b>I</b> D P <b>K</b> D C P V C E V A G R R L <b>A S</b>                                    |      |      |      |      | VWF_F_catus        |
| 1159 | H P E P L A C P V Q C V <b>D</b> G C H A H C P P G K I L D E L L Q T C V D P E D C P <b>A</b> C E V A G <b>Q</b> R L <b>A P</b>                             |      |      |      |      | VWF_E_caballus     |
| 1159 | H P E P L A C P V Q C V E G C H A H C P P G K I L D E L L Q T C <b>I</b> Y P E D C P <b>T</b> C E V A G <b>Q</b> R L <b>A P</b>                             |      |      |      |      | VWF_P_vampyrus     |
| 1158 | H P E P L A C P V Q C V E G C H A H C P P G K I L D E L L Q T C V <b>N</b> P E D C P V C <b>Q V E</b> G R R L <b>A S</b>                                    |      |      |      |      | VWF_B_taurus       |
| 1158 | H P E P L A C P V Q C V E G C H A H C P P <b>X X X X X X X X X X X X X X Q</b> D C P V C E <b>A A G Q</b> R L <b>A P</b>                                    |      |      |      |      | VWF_T_truncatus    |
| 1158 | H P E P L A C P V <b>S</b> C V E G C H A H C P P G K I L D E L L Q T C V <b>S</b> P E D C P V C E <b>A A G R R L A P</b>                                    |      |      |      |      | VWF_S_scrofa       |
| 1158 | H P E P L A C P V <b>E</b> C V E G C H A <b>Y</b> C P P G K I L D E L L Q T C <b>I H</b> P E <b>E</b> C P V C E V <b>E</b> G R R L <b>P S</b>               |      |      |      |      | VWF_D_novemcinctus |
| 1158 | H P E P L A C P V Q C V E G C H A <b>Y</b> C P P G K I L D E L L Q T C <b>I</b> D P <b>Q</b> D C P V C E V A G R R L <b>A S</b>                             |      |      |      |      | VWF_O_cuniculus    |
| 1158 | H P E P L A C P V <b>R</b> C V E G C H A H C P P G K I L D E L L Q T C V D P <b>H</b> D C <b>S</b> V C E V A G R R L <b>A P</b>                             |      |      |      |      | VWF_C_porcellus    |
| 1159 | H P E P L A C P V Q C V E G C H A H C P P G <b>R</b> I L D E L L Q T C V D P <b>Q</b> D C P V C E V A G R R L <b>A P</b>                                    |      |      |      |      | VWF_M_musculus     |
| 1159 | H P E P L A C P V Q C V E G C H A H C P P G K I L D E L L Q T C V D <b>A Q</b> D C P V C E V A G R R L <b>A S</b>                                           |      |      |      |      | VWF_R_norvegicus   |
| 1152 | H P E P L <b>S</b> C P V Q C V E G C H <b>I</b> H C P P G K I L D E L L Q T C <b>I</b> D P <b>T E</b> C P V C E <b>L E</b> G R R F <b>S Q</b>               |      |      |      |      | VWF_M_domesticus   |
| 1158 | H <b>T Q</b> <b>P L K</b> C <b>P L Q</b> C V E G C H <b>V H</b> C P <b>A G</b> K I L D E L <b>S L D</b> C V <b>R P</b> E D C P V C <b>A V G G V K I P H</b> |      |      |      |      | VWF_G_gallus       |
| 1160 | H <b>P Q A L E</b> C <b>P L Q</b> C V E G C H <b>V H</b> C P <b>A G</b> K I L D E L <b>S L D</b> C V <b>S P</b> E D C P V C <b>A V G G D R I P H</b>        |      |      |      |      | VWF_T_guttata      |
| 1155 | H <b>F D S V A</b> C <b>P V K</b> C V E G C H <b>A Q</b> C P <b>A G</b> K I L D E L <b>S N T</b> C V <b>H L E E</b> C P V C <b>E I E G H R V P H</b>        |      |      |      |      | VWF_A_carolinensis |
| 1157 | H P E P <b>V N</b> C <b>P L K</b> C V E G C <b>Q A Y</b> C P P G K I L D E L <b>V S E S C I E P K D C P V C T I E G H T V P H</b>                           |      |      |      |      | VWF_X_tropicalis   |
| 1144 | H P E P L <b>S C P I S</b> C V E G C H <b>A V C</b> P P G <b>H L</b> L D E L <b>V L R K C V E P S Q C Q V C V H D G Q R V S H</b>                           |      |      |      |      | VWF_D_erio         |
| 1146 | H P <b>D</b> <b>P L Q</b> C <b>S L A</b> C V E G C H <b>A Y C</b> P P G <b>Q L L D E V A M R C V D P S Q C Q V C I H E G Q R I S H</b>                      |      |      |      |      | VWF_G_aculeatus    |
| 1148 | H P E P L <b>Q C S F T</b> C V E <b>A</b> C H <b>A Y C</b> P P G <b>Q L L D E V A M R C V N P S Q C Q M C V H N G Q R I S H</b>                             |      |      |      |      | VWF_O_latipes      |
| 1154 | H P <b>N P L H</b> C <b>S L S</b> C V E G C H <b>A Y C</b> P P G <b>Q L L D E V A M R C V N P S D C K V C V H E G Q R I S H</b>                             |      |      |      |      | VWF_T_nigroviridis |
| 1145 | H P <b>D P L H</b> C <b>S L S</b> C V E G C H <b>A Y C</b> P P G <b>Q L L D E V A M R C V N P S E C Q V C I H E G Q R I S H</b>                             |      |      |      |      | VWF_T_rubripes     |

. . . . . C . . C . C  
 G . . . . L . . . D P . . C . . C H C  
 G K K V T L N P D D P E H C Q I C H C

1210

|      |   |   |   |   |   |   |   |   |   |   |   |   |   |   |   |   |   |   |   |
|------|---|---|---|---|---|---|---|---|---|---|---|---|---|---|---|---|---|---|---|
| 1209 | G | K | K | V | T | L | N | P | S | D | P | E | H | C | Q | I | C | H | C |
| 1209 | G | K | K | V | T | L | N | P | S | D | P | E | H | C | Q | I | C | H | C |
| 1209 | K | K | K | V | T | L | N | P | S | D | P | E | H | C | Q | I | C | H | C |
| 1209 | G | K | K | V | T | L | N | P | S | D | P | E | H | C | Q | I | C | H | C |
| 1209 | G | K | K | V | T | L | N | P | S | D | P | E | H | C | Q | I | C | H | C |
| 1209 | G | K | K | V | T | L | N | P | S | D | P | E | H | C | Q | I | C | H | C |
| 1208 | G | K | K | V | T | L | N | R | S | D | P | E | H | C | Q | I | C | H | C |
| 1209 | G | K | K | I | T | L | D | P | D | D | P | E | H | C | Q | I | C | H | C |
| 1209 | G | K | K | I | I | L | N | P | S | D | P | E | H | C | Q | I | C | H | C |
| 1209 | G | K | K | I | T | L | N | P | D | D | P | E | H | C | Q | I | C | H | C |
| 1209 | G | R | K | V | T | L | N | P | S | D | P | Q | H | C | Q | I | C | H | C |
| 1209 | G | K | K | I | T | L | N | P | S | D | P | K | H | C | Q | I | C | H | C |
| 1208 | G | K | K | V | T | L | N | P | G | D | P | E | H | C | Q | I | C | H | C |
| 1208 | G | K | K | I | T | L | N | A | G | D | P | E | R | C | Q | I | C | H | C |
| 1208 | G | K | K | I | I | L | N | P | R | D | P | A | H | C | Q | I | C | H | C |
| 1208 | G | K | K | V | T | L | N | S | N | D | A | E | N | C | Q | I | C | H | C |
| 1208 | G | K | K | V | T | L | N | P | G | D | P | A | H | C | Q | T | C | H | C |
| 1208 | G | R | K | V | T | L | N | P | D | D | P | A | L | C | Q | T | C | H | C |
| 1209 | G | K | K | I | T | L | S | P | D | D | P | A | H | C | Q | N | C | H | C |
| 1209 | G | K | K | I | T | L | S | P | N | D | P | Q | H | C | Q | N | C | H | C |
| 1202 | G | K | R | L | F | L | N | K | D | D | P | T | L | C | K | L | C | H | C |
| 1208 | G | R | R | I | V | L | S | R | D | D | P | Q | H | C | Q | S | C | L | C |
| 1210 | G | R | R | V | V | L | N | R | D | D | P | Q | H | C | Q | S | C | L | C |
| 1205 | G | K | R | I | I | L | N | P | E | D | T | H | L | C | K | S | C | H | C |
| 1207 | G | R | K | I | I | L | N | H | D | D | P | Q | R | C | Q | L | C | H | C |
| 1194 | G | K | Q | F | I | L | N | H | E | D | P | R | L | C | Q | I | C | H | C |
| 1196 | G | N | K | V | I | V | N | N | D | N | P | E | H | C | K | I | C | H | C |
| 1198 | G | N | K | V | I | L | N | H | D | N | P | A | L | C | K | I | C | H | C |
| 1204 | G | N | K | V | I | L | N | R | D | D | P | E | H | C | K | I | C | H | C |
| 1195 | G | N | K | V | I | L | N | H | D | D | P | E | H | C | K | I | C | H | C |

All Match Human  
 28/30 Match Human  
 Majority

VWF\_H\_sapiens  
 VWF\_P\_troglodytes  
 VWF\_G\_gorilla  
 VWF\_P\_abelii  
 VWF\_M\_mulatta  
 VWF\_C\_jacchus  
 VWF\_L\_africana  
 VWF\_A\_melanoleuca  
 VWF\_C\_lupus  
 VWF\_F\_catus  
 VWF\_E\_caballus  
 VWF\_P\_vampyrus  
 VWF\_B\_taurus  
 VWF\_T\_truncatus  
 VWF\_S\_scrofa  
 VWF\_D\_novemcinctus  
 VWF\_O\_cuniculus  
 VWF\_C\_porcellus  
 VWF\_M\_musculus  
 VWF\_R\_norvegicus  
 VWF\_M\_domesticus  
 VWF\_G\_gallus  
 VWF\_T\_guttata  
 VWF\_A\_carolinensis  
 VWF\_X\_tropicalis  
 VWF\_D\_erio  
 VWF\_G\_aculeatus  
 VWF\_O\_latipes  
 VWF\_T\_nigroviridis  
 VWF\_T\_rubripes



. . . . . C . . . . . All Match Human VWF  
 . . . . . C S . . G . . T F D G . . . F . G . C . Y . . . . . Majority Match Human VWF  
 - - A X X X A H - - R V C S T W G D F H Y K T F D G D V F R F P G L C N Y V F X S H C G D S Y E - D Majority

|     | 10                                                                                                  | 20 | 30 | 40 | 50 |                     |
|-----|-----------------------------------------------------------------------------------------------------|----|----|----|----|---------------------|
| 23  | A E G T R G R S S T A R C S L F G S D F V N T F D G S M Y S F A G Y C S Y L L A G G C Q K R - - - S |    |    |    |    | VWF_H_sapiens       |
| 26  | - E G R T R N H G H N V C S T W G N F H Y K T F D G D V F R F P G L C D Y N F A S D C R G S Y K - E |    |    |    |    | MUC2_H_sapiens      |
| 26  | - E G R T R N H G H S V C S T W G D F H Y K T F D G D V F R F P G L C D Y N F A S D C R D S Y K - E |    |    |    |    | MUC2_C_lupus        |
| 26  | - E G R T R N H G H N V C S T W G D F H Y K T F D G D V F R F P G L C D Y N F A S D C R D T Y K - E |    |    |    |    | MUC2_E_caballus     |
| 26  | - E A R S R N H - - - V C S T W G D F H Y K T F D G D V F R F P G L C D Y N F A S D C R D S Y K - E |    |    |    |    | MUC2_M_musculus     |
| 26  | - E A R S R N H - - - V C S T W G D F H Y K T F D G D V F R F P G L C D Y N F A S D C R D S Y K - E |    |    |    |    | MUC2_R_norvegicus   |
| 23  | - K G R T R N H G H Y V C S T W G N N H F K T F D G D I Y Q F P G M C E Y N F V S D C Q D S Y R - E |    |    |    |    | MUC2_G_gallus       |
| 71  | - - A S N P A H N G R V C S T W G S F H Y K T F D G D V F R F P G L C N Y V F S E H C G A A Y E - D |    |    |    |    | MUC5AC_H_sapiens    |
| 66  | - - A L N P A H N G R V C S T W G N F H Y K T F D G D I F H F P G L C N Y V L S A H C G A A Y E - D |    |    |    |    | MUC5AC_C_lupus      |
| 70  | - - A L N P A H N G R V C S T W G D F H Y K T F D G D V F R F P G L C N Y V F S A H C G A A Y E - D |    |    |    |    | MUC5AC_E_caballus   |
| 70  | - - A F N P G H T R R V C S T W G N F H Y K T F D G Q V F Y F P G L C N Y V F S A H C G D A Y E - D |    |    |    |    | MUC5AC_M_musculus   |
| 70  | - - A F N P A H T R R V C S T W G N F H Y K T F D G Q V F Y F P G L C N Y V F S E H C G A A Y E - D |    |    |    |    | MUC5AC_R_norvegicus |
| 67  | - - P L N P A H N G R V C S T W G D F H Y K T F D G D V F R F P G L C N Y V F S E H C R A A Y E - D |    |    |    |    | MUC5B_H_sapiens     |
| 67  | - - F L N P A H N G R V C S T W G D F H Y K T F D G D V F R F P G L C N Y V F S T H C G A A Y E - D |    |    |    |    | MUC5B_C_lupus       |
| 71  | - - A L H L A H N G R V C S T W G D F H Y K T F D G D V F R F P G L C N Y V F S S H C G A T Y E - D |    |    |    |    | MUC5B_M_musculus    |
| 71  | - - A L H L A H N G R V C S T W G D F H Y K T F D G D V F R F P G L C N Y V F S S H C G A T Y E - D |    |    |    |    | MUC5B_R_norvegicus  |
| 39  | - - A P D K G Q - - - C S T W G A G H F S T F D H H V Y D F S G T C N Y I F A A T C K D A F P - T   |    |    |    |    | MUC6_H_sapiens      |
| 41  | - - A P D R G W - - - C S T W G A G H F S T F D G H V Y D F L G T C N Y I F A A T C K D T S P - T   |    |    |    |    | MUC6_C_lupus        |
| 39  | - - S P E K G W - - - C S T W G A G H F S T F D G H E Y N F Q G M C N Y I F T A T C G D D V P A T   |    |    |    |    | MUC6_M_musculus     |
| 38  | - - S P E K G W - - - C S M W G A G H F S T F D G H Q Y N F K G M C N Y V F T A T C G D D L P T T   |    |    |    |    | MUC6_R_norvegicus   |
| 1   | - - V L S K D S - - - C S T W G G G H F S T F D K Y Q Y D F T G T C N Y I F A T V C D E S S P - D   |    |    |    |    | MUC6_G_gallus       |
| 606 | - - - - - - - - - G E I S T W S K G A Y K S F N G R I F F F E S S C P Y T F C R H C I E S G - G D   |    |    |    |    | MUC19_H_sapiens     |
| 110 | - - - - - - - - - G E A S T W G K G A Y K A F N G R I F S F E S S C A Y T F C H H C V E S G - G D   |    |    |    |    | MUC19_C_lupus       |
| 345 | - - - - - - - - - G E A S T W G K G A Y K A F N G R V F S F E S S C T Y T F C R H C V E S G - G D   |    |    |    |    | MUC19_B_taurus      |
| 128 | - - - - - - - - - G E A S T W G K G A Y K A F N G R V F S F E S S C S Y T F C R H C V E S G - G D   |    |    |    |    | MUC19_S_scrofa      |
| 55  | - - - - - - - - - G E A T M W G K D K Y K A L N G H I F S F E S E C T F T F C R D C A E P G - G D   |    |    |    |    | MUC19_M_musculus    |
| 55  | - - - - - - - - - G E A A T W G K G T Y K A L N G R I F S F E S E C T F T F C R D C A E S G - E D   |    |    |    |    | MUC19_R_norvegicus  |
| 171 | - - - - - - - - - G E C G T W G Q G T Y K T L H G Q M F H C K S K S T I S F C R H C G D N - - A E   |    |    |    |    | FIMB1_X_laewis      |

F . . . . . All Match Human VWF  
 F . I . . . . . Majority Match Human VWF  
 F N I Q L R R G L X - - - - P T I E R I L X K I D G L V X E L T K - D S I L V N G X - V V S L P Y Majority

|     | 60                  | 70                  | 80                                      | 90                            | 100 |                     |
|-----|---------------------|---------------------|-----------------------------------------|-------------------------------|-----|---------------------|
| 70  | F S I I G D F Q N G | - - - -             | K R V S L S V Y L G E F F D I H L F V - | N G T V T Q G D Q R V S M P Y |     | VWF_H_sapiens       |
| 74  | F A V H L K R G P G | Q A E A P A G V     | E S I L L T I K D D T I Y L T R -       | H L A V L N G A - V V S T P H |     | MUC2_H_sapiens      |
| 74  | F A V H L K R G A G | R D G K H P Q L     | E Y I L L S I K D D T I Y L T P -       | Q L V V V N G A - L V S T P H |     | MUC2_C_lupus        |
| 74  | F A V H L K R V P G | H E G G S P Q V     | K Y I L L T V K D D T V Y L T P -       | K L A V L N G P - M V S T P H |     | MUC2_E_caballus     |
| 71  | F A V H L K R G L G | E A G G H S Q I     | E S I L I T I K D D T I Y L T H -       | K L A V V N G A - M V S T P H |     | MUC2_M_musculus     |
| 71  | F A V H L K R G L D | K A G G H S S I     | E S V L I T I K D D T I Y L T H -       | K L A V V N G A - M V S T P H |     | MUC2_R_norvegicus   |
| 71  | F S V H I Q R A L N | - S N N H P E I Q   | Y I L I T V T D F T V Y L K P -         | K L A V V D G R - I V K T P Y |     | MUC2_G_gallus       |
| 118 | F N I Q L R R S Q E | - - S A A P T L S   | R V L M K V D G V V I Q L T K -         | G S V L V N G H - P V L L P F |     | MUC5AC_H_sapiens    |
| 113 | F N I Q L R R G L E | - - S N A T T V     | I R V T M K L D G M V I Q L T K -       | N A V L A N G Q - L I Q L P F |     | MUC5AC_C_lupus      |
| 117 | F N V Q L R R S R D | - - S N T T T L S   | R V V M K L D G M V V E L T Q -         | S S V L V N G R - L V R L P F |     | MUC5AC_E_caballus   |
| 117 | F N I Q L R R V Q E | - - S N T T T L S   | R V T M K L D G L V V E L T K -         | S S V L V N N H - P V Q L P F |     | MUC5AC_M_musculus   |
| 117 | F N I Q L R R G L E | - - S N S T T L S   | R V I M K L D G L V V E L T K -         | S S V L V N N H - P V Q L P F |     | MUC5AC_R_norvegicus |
| 114 | F N V Q L R R G L V | - - G S R P V V     | T R V V I K A Q G L V L E A S N -       | G S V L I N G Q - R E E L P Y |     | MUC5B_H_sapiens     |
| 114 | F N I Q L R R G L A | - - G S R P T I T H | V V L K T Q G L V L E A S N -           | G S V L I N G Q - R E E L P Y |     | MUC5B_C_lupus       |
| 118 | F N I Q L R R G L E | - - G S R P T V     | T Y V L L R A Q G L V I E L S N -       | G S V L V N G H - R E E L P Y |     | MUC5B_M_musculus    |
| 118 | F N I Q L R R G L E | - - G S R P T V     | T Y V F L R A Q G L V I E L S N -       | G S V L V N G H - R E E L P Y |     | MUC5B_R_norvegicus  |
| 82  | F S V Q L R R G P D | - - - - G S I S     | R I I V E L G A S V V T V S E -         | A I I S V K D I G V I S L P Y |     | MUC6_H_sapiens      |
| 84  | F S V Q L R R G P G | - - - - G G I S     | R V I V E L G A S V V T V Q K -         | A V I S V K D V G V V G L P Y |     | MUC6_C_lupus        |
| 83  | F S I Q L R R D M E | - - - - G N I S     | R I I M E L G A S V V T V N K -         | E T I S V R D I G V V S L P Y |     | MUC6_M_musculus     |
| 82  | F S I Q L R R D G D | - - - - G N I S     | R I I I E L G A S V V T V N K -         | E T I S V R D I G V V S L P Y |     | MUC6_R_norvegicus   |
| 44  | F N I Q F R R G L D | - - - - K K I A     | R I I I E L G P S V I I V E K -         | D S I S V R S V G V I K L P Y |     | MUC6_G_gallus       |
| 645 | F N I E I K R N N D | - - - - S E I E     | K I T V L I D N N D V S I F G -         | D T I L V N G E S V Q I P - Y |     | MUC19_H_sapiens     |
| 149 | F N I E I K R N S N | - - - - S D F E     | K I A V K I D N N E V S I F G -         | D N I V N E K S V Q I P - Y   |     | MUC19_C_lupus       |
| 384 | F N I E I K R N N D | - - - - S E I E     | K I T V I I D N N D V S I F G -         | D I L L V N G E S V Q I P - Y |     | MUC19_B_taurus      |
| 167 | F N V E I K R N N D | - - - - S E I E     | K I T V I I D N N D I S I S G -         | D V I L V N G E S V H I P - Y |     | MUC19_S_scrofa      |
| 94  | F N I E I K K H K N | - - - - G D I E     | E I K A L I D D V E I L V V R -         | N S I S V N E E R V K V P - F |     | MUC19_M_musculus    |
| 94  | F N V E I K R H E N | - - - - G D I E     | E I K A L I D D V G I L V V R -         | D T I S V N E E R V Q M P - F |     | MUC19_R_norvegicus  |
| 209 | F N V E T K R K E E | - - - - G H F       | E K L R F Q I D G V E V E A N D N       | D E I Y I N N K K I S N E Q Y |     | FIMB1_X_laewis      |

. . . . . C G . All Match Human VWF  
 . . . G L . . E . . . Y . K . . . - - . . . . . L . . . Y . N . T C G L Majority Match Human VWF  
 S S S G L L I E K S G X Y V K V V A R - - - L G L V L M W N K E D S L M L E L D K K Y A N X T C G L Majority

|     | 110                                                                                                 | 120                                                     | 130 | 140 | 150 |                     |
|-----|-----------------------------------------------------------------------------------------------------|---------------------------------------------------------|-----|-----|-----|---------------------|
| 114 | A S K G L Y L E T E A G Y Y K L S G E A - -                                                         | Y G F V A R I D G S G N F Q V L L S D R Y F N K T C G L |     |     |     | VWF_H_sapiens       |
| 122 | Y S P G L L I E K S D A Y T K V Y S R - - -                                                         | A G L T L M W N R E D A L M L E L D T K F R N H T C G L |     |     |     | MUC2_H_sapiens      |
| 122 | Y S S G L L I E K N D A Y T K V Y S R - - -                                                         | A G L T L M W N R E D S L M L E L D S R F Q N H T C G L |     |     |     | MUC2_C_lupus        |
| 122 | Y S P G L L I E R N D A Y I K V F S R - - -                                                         | A G L T L M W D R E D S L M L E L D S K F Q N H T C G L |     |     |     | MUC2_E_caballus     |
| 119 | Y S S G L L I E K N D A Y T K V Y S R - - -                                                         | A G L S L M W N R E D A L M V E L D S R F Q N H T C G L |     |     |     | MUC2_M_musculus     |
| 119 | Y S S G L L I E K N D A Y T K V Y S R - - -                                                         | A G L S L M W N R E D A L M V E L D G R F Q N H T C G L |     |     |     | MUC2_R_norvegicus   |
| 118 | Y S S G L L I E S N D I Y T K V Y A K - - -                                                         | L G L I L I W N Q E D A L M V E L D S K F G N Q T C G L |     |     |     | MUC2_G_gallus       |
| 164 | S Q S G V L I Q Q S S S Y T K V E A R - - -                                                         | L G L V L M W N H D D S L L L E L D T K Y A N K T C G L |     |     |     | MUC5AC_H_sapiens    |
| 159 | S Q S G V L I E H S S N S L K V V A R - - -                                                         | L G L V F M W S Q D D S L L L E L D A K Y A N Q T C G L |     |     |     | MUC5AC_C_lupus      |
| 163 | S Q S G V L I E H S S S Y L K V V A R - - -                                                         | L G L V F M W N Q D D S L L L E L D N K Y A N Q T C G L |     |     |     | MUC5AC_E_caballus   |
| 163 | S Q S G V L I E L S N G Y L K V V A R - - -                                                         | L G L L F V W N E D D S L L L E L D T K Y T N K T C G L |     |     |     | MUC5AC_M_musculus   |
| 163 | S Q S G V L I E L S N G Y L K V V A R - - -                                                         | L G L V F M W N D D D S L L L E L D T K Y A N K T C G L |     |     |     | MUC5AC_R_norvegicus |
| 160 | S R T G L L V E Q S G D Y I K V S I R - - -                                                         | L V L T F L W N G E D S A L L E L D P K Y A N Q T C G L |     |     |     | MUC5B_H_sapiens     |
| 160 | S R A G L L V E Q S S V Y L K V T V R - - -                                                         | L G L T F L W N R E D S A L L E L D P K Y A N Q T C G L |     |     |     | MUC5B_C_lupus       |
| 164 | S R A G L L M E K S S G Y V K I S I R - - -                                                         | L V L T F L W N E E D S A L L E L D S K Y I N Q T C G L |     |     |     | MUC5B_M_musculus    |
| 164 | S R A G L L M E K T S G Y V K I S I R - - -                                                         | L V L N F L W N E E D S V L L E L D S K Y T N Q T C G L |     |     |     | MUC5B_R_norvegicus  |
| 126 | T S N G L Q I T P F G Q S V R L V A K Q L E L E L E V V W G P D S H L M V L V E R K Y M G Q M C G L |                                                         |     |     |     | MUC6_H_sapiens      |
| 128 | T S N G L Q I T P F G Q N V Q L V A K Q L E L E L V V M W G P G T H L M V L V E K R H M G K L C G L |                                                         |     |     |     | MUC6_C_lupus        |
| 127 | T S N G L Q I T P Y G Q S V Q L V A K Q L E L E L V I T W G P D A H L T V Q V E T K Y M G K L C G L |                                                         |     |     |     | MUC6_M_musculus     |
| 126 | T S N G L Q I T P Y G Q S V Q L V A K Q L E L E L V I M W G P D A H L M V L V E K K Y M G K L C G L |                                                         |     |     |     | MUC6_R_norvegicus   |
| 88  | A S N G I Q I A P Y G R S V R L V A K L M E M E L V V M W N N E D Y L M V L T E K K Y M G K T C G M |                                                         |     |     |     | MUC6_G_gallus       |
| 688 | N N K L I H I K K Y G E H N V L N S R R - - G I L T L M W D K N N K L S L T L H K Q Y P - - T C G L |                                                         |     |     |     | MUC19_H_sapiens     |
| 192 | D N K L I H I K K Y G E H Y V L K S R R - - G I L S L M W D K N - K L S L A L H K Q Y P - - T C G L |                                                         |     |     |     | MUC19_C_lupus       |
| 427 | N N K L I H I K K Y G E H N V L N S R R - - G I L S L M W D K N N K L S L T L H K Q Y P - - T C G L |                                                         |     |     |     | MUC19_B_taurus      |
| 210 | N N K L I H I K K Y G E H N V L N S R R - - G I L S L M W D K N N K L S L T I H K Q Y P - - T C G L |                                                         |     |     |     | MUC19_S_scrofa      |
| 137 | S N K M I H I K K Q G N H Y S L K T R R - - R I L S L K W S K D - K L S L I L Y S H Y T - - T C G L |                                                         |     |     |     | MUC19_M_musculus    |
| 137 | S N K M I H I K K Q G D H Y V L K T R R - - K I L S L S W G K N - K L S L T L Y R Q Y I - - T C G L |                                                         |     |     |     | MUC19_R_norvegicus  |
| 254 | N D K Q V R L R R N G I Y M Q F Y N H Q - - E D V K V T W H K N - Q F S L M L N K A Y E - - T C G L |                                                         |     |     |     | FIMB1_X_laewis      |

C G . . . . . All Match Human VWF  
 C G . F N . . . . . P . . F . N . . . . . C . . . . . Majority Match Human VWF  
 C G D F N G L P G D N E F L S - E G I R L S P I E F G N L Q K L D K P T E Q C E D P V P X - P - - N Majority

|     | 160 |   |   |   |   |   |   |   |   |   | 170 |   |   |   |   |   |   |   |   |   | 180 |   |   |   |   |   |   |   |   |   | 190 |   |   |   |   |   |   |   |   |   | 200 |   |   |   |   |   |   |   |   |                     |                    |
|-----|-----|---|---|---|---|---|---|---|---|---|-----|---|---|---|---|---|---|---|---|---|-----|---|---|---|---|---|---|---|---|---|-----|---|---|---|---|---|---|---|---|---|-----|---|---|---|---|---|---|---|---|---------------------|--------------------|
| 162 | C   | G | N | F | N | I | F | A | E | D | D   | F | M | T | Q | E | G | T | L | T | S   | D | P | Y | D | F | A | N | S | W | A   | L | S | S | G | E | Q | W | C | E | R   | A | S | P | P | S | S | S | C | N                   | VWF_H_sapiens      |
| 169 | C   | G | D | Y | N | G | L | Q | S | Y | S   | E | F | L | S | - | D | G | V | L | F   | S | P | L | E | F | G | N | M | Q | K   | I | N | Q | P | D | V | V | C | E | D   | P | E | E | E | V | A | P | A | S                   | MUC2_H_sapiens     |
| 169 | C   | G | D | Y | N | G | L | Q | T | Y | S   | E | F | L | S | - | D | G | V | L | F   | S | A | I | E | F | G | T | M | Q | K   | I | N | K | P | G | V | V | C | D | D   | P | E | E | E | P | A | L | E | S                   | MUC2_C_lupus       |
| 169 | C   | G | D | Y | N | G | L | Q | S | Y | S   | E | F | L | S | - | D | G | L | F | S   | A | V | Q | F | G | N | M | Q | K | I   | N | K | P | D | V | V | C | D | D | P   | E | E | G | R | T | P | E | S | MUC2_E_caballus     |                    |
| 166 | C   | G | D | F | N | G | M | Q | T | N | Y   | E | F | L | S | E | E | G | I | Q | F   | S | A | I | E | F | G | N | M | Q | K   | I | N | K | P | E | V | Q | C | E | D   | P | E | A | V | Q | E | P | E | S                   | MUC2_M_musculus    |
| 166 | C   | G | D | F | N | G | M | Q | A | N | N   | E | F | L | S | - | D | G | I | R | F   | S | A | I | E | F | G | N | M | Q | K   | I | N | K | P | E | V | V | C | E | D   | P | E | E | V | Q | E | P | E | S                   | MUC2_R_norvegicus  |
| 165 | C   | G | D | Y | N | G | V | P | I | Y | N   | E | F | I | S | - | G | V | A | S | Y   | N | S | I | T | Y | G | N | L | Q | K   | I | S | K | P | N | D | E | C | E | D   | P | D | E | T | R | A | L | P | S                   | MUC2_G_gallus      |
| 211 | C   | G | D | F | N | G | M | P | V | V | S   | E | L | L | S | - | H | N | T | K | L   | T | P | M | E | F | G | N | L | Q | K   | M | D | D | P | T | E | Q | C | Q | D   | P | V | P | E | - | P | P | R | N                   | MUC5AC_H_sapiens   |
| 206 | C   | G | D | F | N | S | E | P | V | F | N   | E | F | L | S | - | H | G | V | K | L   | T | P | I | Q | F | G | N | L | Q | K   | M | D | G | P | T | E | Q | C | Q | D   | P | V | P | V | - | P | M | M | D                   | MUC5AC_C_lupus     |
| 210 | C   | G | D | F | N | G | V | P | I | F | N   | E | F | F | S | - | H | N | V | K | L   | T | P | F | E | F | G | N | L | Q | K   | M | D | G | P | M | E | Q | C | Q | D   | P | I | P | A | - | S | P | A | N                   | MUC5AC_E_caballus  |
| 210 | C   | G | D | F | N | G | S | P | K | S | N   | E | F | L | S | - | N | N | V | R | L   | T | P | L | E | F | G | N | L | Q | K   | M | D | G | P | T | E | Q | C | Q | D   | P | L | P | V | - | P | Q | K | N                   | MUC5AC_M_musculus  |
| 210 | C   | G | D | F | N | G | S | P | E | S | E   | F | L | S | - | H | N | V | R | L | T   | P | L | E | F | G | N | F | Q | K | M   | D | G | P | T | E | Q | C | Q | D | P   | L | P | V | - | P | Q | K | N | MUC5AC_R_norvegicus |                    |
| 207 | C   | G | D | F | N | G | L | P | A | F | N   | E | F | Y | A | - | H | N | A | R | L   | T | P | L | Q | F | G | N | L | Q | K   | L | D | G | P | T | E | Q | C | P | D   | P | L | P | L | - | P | A | G | N                   | MUC5B_H_sapiens    |
| 207 | C   | G | D | F | N | G | L | P | A | V | N   | E | F | Y | S | - | H | N | A | R | L   | T | P | L | Q | F | G | N | L | Q | K   | L | D | G | P | T | E | Q | C | Q | D   | P | P | P | S | - | P | A | N | N                   | MUC5B_C_lupus      |
| 211 | C   | G | D | F | N | G | L | P | A | V | S   | E | F | Y | T | - | H | N | T | R | L   | T | P | V | Q | F | G | N | L | Q | K   | L | D | G | P | T | E | Q | C | Q | D   | V | L | P | S | - | A | V | S | N                   | MUC5B_M_musculus   |
| 211 | C   | G | D | F | N | G | L | P | A | V | N   | E | F | Y | A | - | H | N | T | R | L   | T | P | V | Q | F | G | N | L | Q | K   | L | D | G | P | T | E | Q | C | Q | D   | V | L | L | S | - | P | A | N | N                   | MUC5B_R_norvegicus |
| 176 | C   | G | N | F | D | G | - | K | V | T | N   | E | F | V | S | E | E | G | K | F | L   | E | P | H | K | F | A | A | L | Q | K   | L | D | D | P | G | E | I | C | T | F   | Q | D | I | P | S | T | H | V | R                   | MUC6_H_sapiens     |
| 178 | C   | G | D | F | N | G | - | E | Q | T | N   | E | F | L | S | E | E | G | K | F | L   | E | P | H | T | Y | A | A | L | Q | T   | L | D | D | P | D | E | I | C | T | Y   | K | A | V | P | N | P | Q | V | P                   | MUC6_C_lupus       |
| 177 | C   | G | N | F | D | G | - | K | I | D | N   | E | F | L | S | E | D | G | K | L | L   | E | A | H | K | Y | A | T | L | Q | K   | L | D | D | P | N | E | I | C | A | H   | E | A | I | P | S | T | I | I | L                   | MUC6_M_musculus    |
| 176 | C   | G | N | F | D | G | - | K | I | D | N   | E | F | L | S | E | D | G | K | L | L   | E | P | H | K | Y | A | T | L | Q | K   | L | D | D | P | N | E | I | C | A | H   | E | A | I | P | S | P | S | I | L                   | MUC6_R_norvegicus  |
| 138 | C   | G | N | Y | D | G | - | Y | E | L | N   | D | F | V | S | E | - | G | K | L | L   | D | T | Y | K | F | A | A | L | Q | K   | M | D | D | P | S | E | I | C | L | S   | E | E | I | S | I | P | A | I | P                   | MUC6_G_gallus      |
| 734 | C   | G | N | F | N | S | T | P | G | Q | -   | D | I | N | - | - | E | H | I | A | N   | S | K | I | P | G | D | C | P | N | A   | V | G | K | S | Y | E | V | C | E | D   | G | I | Q | H | - | - | - | - | -                   | MUC19_H_sapiens    |
| 237 | C   | G | N | F | N | S | T | P | G | D | -   | N | I | N | - | - | E | H | I | A | R   | S | K | I | P | G | D | C | P | K | A   | V | S | K | N | Y | E | V | C | E | D   | G | V | Q | H | - | - | - | - | -                   | MUC19_C_lupus      |
| 473 | C   | G | N | F | N | S | T | P | G | D | -   | D | I | N | - | - | E | H | I | A | D   | S | K | I | P | D | D | C | S | K | A   | V | S | K | S | Y | E | V | C | E | D   | G | V | Q | Y | - | - | - | - | -                   | MUC19_B_taurus     |
| 256 | C   | G | N | F | N | N | T | P | G | E | -   | D | I | D | - | - | E | H | I | A | N   | S | K | I | P | G | N | C | P | N | A   | V | S | K | S | Y | E | L | C | E | D   | G | V | Q | H | - | - | - | - | -                   | MUC19_S_scrofa     |
| 182 | C   | G | N | F | D | S | V | P | G | D | -   | D | V | N | - | - | E | H | I | A | S   | S | K | I | S | N | D | C | P | S | P   | L | S | R | S | N | E | V | C | E | D   | G | V | Q | Y | - | - | - | - | -                   | MUC19_M_musculus   |
| 182 | C   | G | D | F | N | S | V | P | G | E | E   | D | I | N | - | - | E | H | I | A | N   | S | K | I | S | N | D | C | P | S | T   | L | S | R | N | N | E | V | C | E | D   | G | V | Q | Y | - | - | - | - | -                   | MUC19_R_norvegicus |
| 299 | C   | G | G | S | K | D | N | T | D | D | -   | - | - | - | - | - | K | T | F | F | E   | S | Q | I | I | E | K | D | G | E | T   | E | F | I | T | S | D | P | E | D | E   | G | T | K | Y | - | - | - | - | -                   | FIMB1_X_laewis     |

|     |                                                                                               |   |   |   |   |     |   |   |   |   |     |   |   |   |   |     |   |   |   |   |                          |   |   |   |   |   |   |   |   |   |   |   |   |   |   |   |   |   |   |   |   |   |   |   |   |   |   |   |   |                   |                     |
|-----|-----------------------------------------------------------------------------------------------|---|---|---|---|-----|---|---|---|---|-----|---|---|---|---|-----|---|---|---|---|--------------------------|---|---|---|---|---|---|---|---|---|---|---|---|---|---|---|---|---|---|---|---|---|---|---|---|---|---|---|---|-------------------|---------------------|
|     | C . . . . . C . . . . . F . . . . . V . . . . . C . . . . . C . C . . .                       |   |   |   |   |     |   |   |   |   |     |   |   |   |   |     |   |   |   |   | All Match Human VWF      |   |   |   |   |   |   |   |   |   |   |   |   |   |   |   |   |   |   |   |   |   |   |   |   |   |   |   |   |                   |                     |
|     | C S X H - - - - - I C E X L L T X Y A F K X C K A L V D S E S Y V X A C Q Q D L C X C P X G - |   |   |   |   |     |   |   |   |   |     |   |   |   |   |     |   |   |   |   | Majority Match Human VWF |   |   |   |   |   |   |   |   |   |   |   |   |   |   |   |   |   |   |   |   |   |   |   |   |   |   |   |   |                   |                     |
|     | C S X H - - - - - I C E X L L T X Y A F K X C K A L V D S E S Y V X A C Q Q D L C X C P X G - |   |   |   |   |     |   |   |   |   |     |   |   |   |   |     |   |   |   |   | Majority                 |   |   |   |   |   |   |   |   |   |   |   |   |   |   |   |   |   |   |   |   |   |   |   |   |   |   |   |   |                   |                     |
|     | 210                                                                                           |   |   |   |   | 220 |   |   |   |   | 230 |   |   |   |   | 240 |   |   |   |   | 250                      |   |   |   |   |   |   |   |   |   |   |   |   |   |   |   |   |   |   |   |   |   |   |   |   |   |   |   |   |                   |                     |
| 212 | I                                                                                             | S | S | G | E | M   | Q | K | G | L | W   | E | Q | C | Q | L   | L | K | S | T | S                        | V | F | A | R | C | H | P | L | V | D | P | E | P | F | V | A | L | C | E | K | T | L | C | E | C | A | G | G | -                 | VWF_H_sapiens       |
| 218 | C                                                                                             | S | E | H | - | -   | - | - | - | R | A   | E | C | E | R | L   | L | T | A | E | A                        | F | A | D | C | Q | D | L | V | P | L | E | P | Y | L | R | A | C | Q | Q | D | R | C | R | C | P | G | G | - | MUC2_H_sapiens    |                     |
| 218 | C                                                                                             | S | E | H | - | -   | - | - | - | R | A   | E | C | E | R | L   | L | T | A | S | A                        | F | K | D | C | L | G | L | L | P | L | E | L | Y | V | Q | A | C | A | Q | D | R | C | R | C | P | V | G | - | MUC2_C_lupus      |                     |
| 218 | C                                                                                             | S | E | H | - | -   | - | - | - | R | A   | E | C | E | K | L   | L | T | A | A | A                        | F | K | D | C | L | G | L | V | P | L | E | P | Y | V | Q | A | C | A | Q | D | R | C | Q | C | P | S | G | - | MUC2_E_caballus   |                     |
| 216 | C                                                                                             | S | E | H | - | -   | - | - | - | R | A   | E | C | E | R | L   | L | T | S | A | A                        | F | E | D | C | Q | T | R | V | P | V | E | S | Y | V | R | A | C | M | H | D | R | C | Q | C | P | K | G | - | MUC2_M_musculus   |                     |
| 215 | C                                                                                             | S | E | H | - | -   | - | - | - | R | A   | E | C | E | R | L   | L | T | S | T | A                        | F | E | D | C | Q | A | R | V | P | V | E | L | Y | V | L | A | C | M | H | D | R | C | Q | C | P | Q | G | - | MUC2_R_norvegicus |                     |
| 214 | C                                                                                             | N | E | H | - | -   | - | - | - | R | E   | E | C | E | K | L   | L | T | S | S | A                        | F | A | D | C | H | S | R | L | N | L | E | M | Y | I | Q | A | C | M | Q | D | K | C | A | C | K | G | N | E | -                 | MUC2_G_gallus       |
| 259 | C                                                                                             | S | T | G | - | -   | - | - | - | F | G   | I | C | E | E | L   | L | H | G | Q | L                        | F | S | G | C | V | A | L | V | D | V | G | S | Y | L | E | A | C | R | Q | D | L | C | F | C | E | D | T | D | -                 | MUC5AC_H_sapiens    |
| 254 | C                                                                                             | S | P | G | - | -   | - | - | - | S | S   | I | C | E | E | I   | L | S | S | R | L                        | F | S | G | C | S | A | L | V | D | A | S | S | Y | V | Q | A | C | R | H | D | L | C | A | C | E | H | A | N | -                 | MUC5AC_C_lupus      |
| 258 | C                                                                                             | S | T | D | - | -   | - | - | - | V | G   | V | C | K | E | I   | L | S | S | Q | M                        | F | S | S | C | N | T | L | V | D | V | G | S | Y | V | E | A | C | Q | Q | D | L | C | L | C | E | H | S | N | -                 | MUC5AC_E_caballus   |
| 258 | C                                                                                             | S | A | R | - | -   | - | - | - | S | G   | I | C | E | M | I   | L | K | G | E | L                        | F | S | G | C | A | A | L | V | D | I | S | S | Y | V | E | A | C | R | Q | D | V | C | L | C | E | S | L | D | -                 | MUC5AC_M_musculus   |
| 258 | C                                                                                             | S | I | R | - | -   | - | - | - | S | S   | I | C | E | E | I   | L | K | G | Q | L                        | F | S | N | C | A | A | L | V | D | I | S | S | Y | L | E | A | C | Q | Q | D | L | C | L | C | E | S | S | D | -                 | MUC5AC_R_norvegicus |
| 255 | C                                                                                             | T | D | E | - | -   | - | - | - | E | G   | I | C | H | R | T   | L | L | G | P | A                        | F | A | E | C | H | A | L | V | D | S | T | A | Y | L | A | A | C | A | Q | D | L | C | R | C | P | - | - | - | -                 | MUC5B_H_sapiens     |
| 255 | C                                                                                             | T | D | R | - | -   | - | - | - | E | G   | V | C | R | R | T   | L | L | G | Q | A                        | F | A | E | C | N | A | L | V | D | P | A | E | Y | V | A | V | C | T | Q | D | L | C | R | C | P | - | - | - | -                 | MUC5B_C_lupus       |
| 259 | C                                                                                             | T | D | T | - | -   | - | - | - | E | D   | I | C | R | R | T   | L | L | G | P | A                        | F | D | K | C | T | A | L | V | D | V | S | M | Y | L | D | A | C | V | Q | D | L | C | R | C | P | - | - | - | -                 | MUC5B_M_musculus    |
| 259 | C                                                                                             | T | D | T | - | -   | - | - | - | E | G   | I | C | R | H | I   | L | L | G | P | A                        | F | A | E | C | I | A | L | V | D | V | N | V | Y | L | D | A | C | V | Q | D | L | C | R | C | P | - | - | - | -                 | MUC5B_R_norvegicus  |
| 225 | Q                                                                                             | A | Q | H | - | -   | - | - | - | A | R   | I | C | T | Q | L   | L | T | - | - | -                        | L | V | A | P | E | C | S | V | S | K | E | P | F | V | L | S | C | Q | A | D | V | A | A | A | P | Q | P | G | -                 | MUC6_H_sapiens      |
| 227 | Q                                                                                             | A | E | H | - | -   | - | - | - | A | Q   | T | C | T | Q | L   | L | T | - | - | -                        | L | V | A | P | E | C | N | V | P | K | E | P | F | M | W | S | C | Q | V | D | M | A | E | C | V | L | R | G | -                 | MUC6_C_lupus        |
| 226 | K                                                                                             | T | R | Y | - | -   | - | - | - | A | Q   | I | C | N | Q | L   | L | T | - | - | -                        | L | V | S | P | G | C | D | V | P | K | E | T | L | M | L | S | C | Q | A | D | M | A | A | C | A | R | P | G | -                 | MUC6_M_musculus     |
| 225 | K                                                                                             | T | R | Y | - | -   | - | - | - | A | H   | I | C | N | Q | L   | L | T | - | - | -                        | L | V | S | P | G | C | D | V | P | K | E | T | L | M | L | S | C | Q | E | D | M | A | D | C | A | Q | P | G | -                 | MUC6_R_norvegicus   |
| 186 | H                                                                                             | K | K | Y | - | -   | - | - | - | A | V   | I | C | S | Q | L   | L | N | - | - | -                        | L | V | S | P | T | C | S | V | P | K | D | G | F | V | T | R | C | Q | L | D | M | Q | D | C | S | E | P | G | -                 | MUC6_G_gallus       |
| 776 | -                                                                                             | - | - | - | - | -   | - | - | - | - | -   | - | C | N | K | I   | I | G | T | Y | F                        | E | K | C | G | K | V | A | A | L | S | N | D | Y | K | M | I | C | I | D | E | Y | - | - | C | Q | T | R | - | -                 | MUC19_H_sapiens     |
| 279 | -                                                                                             | - | - | - | - | -   | - | - | - | - | -   | - | C | D | K | I   | I | G | T | Y | F                        | E | K | C | R | K | V | A | A | F | S | T | H | Y | R | M | I | C | V | D | D | Y | - | - | C | R | N | R | - | -                 | MUC19_C_lupus       |
| 515 | -                                                                                             | - | - | - | - | -   | - | - | - | - | -   | - | C | N | K | I   | I | G | T | Y | F                        | E | K | C | G | K | V | S | T | L | S | S | D | Y | K | M | I | C | I | D | E | Y | - | - | C | Q | S | R | - | -                 | MUC19_B_taurus      |
| 298 | -                                                                                             | - | - | - | - | -   | - | - | - | - | -   | - | C | E | K | I   | I | G | T | Y | F                        | E | K | C | Q | K | V | S | S | L | S | N | D | Y | K | I | I | C | I | D | E | Y | - | - | C | Q | N | R | - | -                 | MUC19_S_scrofa      |
| 224 | -                                                                                             | - | - | - | - | -   | - | - | - | - | -   | - | C | D | K | I   | I | E | T | Y | F                        | E | K | C | S | K | V | S | P | L | S | R | E | Y | K | N | V | C | A | D | E | Y | - | - | C | R | K | G | G | -                 | MUC19_M_musculus    |
| 225 | -                                                                                             | - | - | - | - | -   | - | - | - | - | -   | - | C | D | R | I   | I | G | T | Y | F                        | E | K | C | S | K | V | S | P | L | S | S | E | Y | K | N | V | C | V | D | E | Y | - | - | C | R | T | G | G | -                 | MUC19_R_norvegicus  |
| 338 | -                                                                                             | - | - | - | - | -   | - | - | - | - | -   | - | C | S | K | I   | I | S | K | W | F                        | S | S | L | D | Y | G | S | A | S | Q | E | D | Y | I | K | A | C | A | C | E | H | N | S | C | T | E | N | D | -                 | FIMB1_X_laewis      |

. . . . . C . . . . . E . . R . . . . . W . . . . . C . . . . . C . . . . . All Match Human VWF  
 . . . C . C . . L . E Y . R . C A . . G - - . . . W . . . - - . C . . - - . C P . . M . Y . . Majority Match Human VWF  
 - K X C T C X T L A E Y S R Q C A H A G - - G R P E N W R T P S - - L C P K - - T C P G N M V Y Q E Majority

|     | 260                                     | 270                             | 280           | 290                     | 300 |                     |
|-----|-----------------------------------------|---------------------------------|---------------|-------------------------|-----|---------------------|
| 261 | - L E C A C P A L L E Y A R T C A Q E G | - - M V L Y G W T D H S         | - - A C S P   | - - V C P A G M E Y R Q |     | VWF_H_sapiens       |
| 261 | - D T C V C S T V A E F S R Q C S H A G | - - G R P G N W R T A T         | - - L C P K   | - - T C P G N L V Y L E |     | MUC2_H_sapiens      |
| 261 | - T S C A C S T L A E F S R Q C S H A G | - - G Q P G N W R T A E         | - - L C P K   | - - S C P G N M V Y L E |     | MUC2_C_lupus        |
| 261 | - A S C V C S T L A E F S R Q C S H A G | - - G R P G N W R T G T         | - - L C P K   | - - S C P G N M V Y L E |     | MUC2_E_caballus     |
| 259 | - G A C E C S T L A E F S R Q C S H A G | - - G R P E N W R T A S         | - - L C P K   | - - K C P N N M V Y L E |     | MUC2_M_musculus     |
| 258 | - G A C E C S T L A E F S R Q C S H A G | - - G R P E N W R T A S         | - - L C P K   | - - K C P G N M V Y L E |     | MUC2_R_norvegicus   |
| 258 | D S F C L C S T I S E Y S R Q C S H A G | - - G R P G E W R T E N         | - - F C Y K   | - - T C P G N M V Y R E |     | MUC2_G_gallus       |
| 303 | L L S C V C H T L A E Y S R Q C T H A G | - - G L P Q D W R G P D         | - - F C P Q   | - - K C P N N M Q Y H E |     | MUC5AC_H_sapiens    |
| 298 | P S S C I C H T L A E Y S R Q C A H A G | - - G L P L D W R G P D         | - - L C P Q   | - - T C P L N M Q Y R E |     | MUC5AC_C_lupus      |
| 302 | L T S C L C H T L A E Y S R Q C A H A G | - - G L P R D W R S P D         | - - L C P V   | - - K C P L N L Q Y R E |     | MUC5AC_E_caballus   |
| 302 | P S D C I C H T L A E Y S R Q C A H A G | - - G Q P Q D W R G P N         | - - L C S Q   | - - T C P L N M Q H Q E |     | MUC5AC_M_musculus   |
| 302 | P S N C I C H T L A E Y S R Q C A H A G | - - G Q P Q N W R G P N         | - - L C P Q   | - - T C L L N M E Y Q E |     | MUC5AC_R_norvegicus |
| 296 | - - T C P C A T F V E Y S R Q C A H A G | - - G Q P R N W R C P E         | - - L C P R   | - - T C P L N M Q H Q E |     | MUC5B_H_sapiens     |
| 296 | - - T C P C A T F A E Y S R Q C A H A G | - - G R P Q N W R G P D         | - - L C P Q   | - - T C P L N M R H Q E |     | MUC5B_C_lupus       |
| 300 | - - T C P C A T F A E Y S R Q C A H A G | - - G Y P Q N W R H P D         | - - L C N W   | - - T C P F N M E Y R E |     | MUC5B_M_musculus    |
| 300 | - - T C P C A T F A E Y S R Q C A H A G | - - G H P Q N W R R S D         | - - L C N W   | - - T C P F N M E Y Q E |     | MUC5B_R_norvegicus  |
| 266 | P Q N S S C A T L S E Y S R Q C S M V G | - - Q P V R R W R S P G         | - - L C S V G | - Q C P A N Q V Y Q E   |     | MUC6_H_sapiens      |
| 268 | Q H N C S C A T L S E Y S R Q C S M A G | - - Q A V S N W R G P G         | - - L C P V G | - T C P A N Q V Y Q E   |     | MUC6_C_lupus        |
| 267 | Q P N C S C A T L S E Y S R R C S M T G | - - Q P V R N W R T P A         | - - L C P M S | - Q C P A N Q V Y Q E   |     | MUC6_M_musculus     |
| 266 | Q P N C S C A T L S E Y S R R C S M A G | - - Q P V R N W R T P S         | - - L C P M S | - Q C P A N Q V Y Q E   |     | MUC6_R_norvegicus   |
| 227 | Q K N C T C S T L S E Y S R Q C A M S H | - - Q V V F N W R T E N         | - - F C S V G | - K C S A N Q I Y E E   |     | MUC6_G_gallus       |
| 810 | D K T S T C D T Y S E L S R L C A S D G | - P G T F E S W R S D S         | D V V C G T Q | - R C P E Q H I Y K E   |     | MUC19_H_sapiens     |
| 313 | D K N A T C D T Y S E L S R L C T S D G | - P G I Y E S W R D D L D V T   | C G K P       | - T C P E K H I Y K E   |     | MUC19_C_lupus       |
| 549 | D R T S T C D T Y S E L S R L C A S D G | - P G T F E S W R D D P D V V   | C E K P       | - I C P E K H I Y K E   |     | MUC19_B_taurus      |
| 332 | D A K S T C D T Y S E L S R L C A S D G | - P G V Y E S W R D D S A V V   | C E K P       | - N C P E K H I Y K E   |     | MUC19_S_scrofa      |
| 259 | G K Q T T C D T Y S E L A R L C A Y D G | - P G D Y E H W R D D S A V V   | C A K E       | - Q C P G K H I Y K E   |     | MUC19_M_musculus    |
| 260 | N K Q T T C N T Y S E L A R L C A Y D G | - P G V F E H W R D D S A V V   | C A K Q       | - Q C P G K H I Y K E   |     | MUC19_R_norvegicus  |
| 375 | K R A C T C S T F M E L A R M S G N G G | C S D S W R S W R Q D E D V I C | A V P L Q     | C P E N Q V Y D E       |     | FIMB1_X_laewis      |

. . . . . C . . . . . G C . C P . G . . . . . C . . . . . C . All Match Human VWF  
 C . S P C . . T C . . . . . C . . . . . G C . C P E G . . L D . . . . . - . C V . . . . . C P Majority Match Human VWF  
 C G S P C V D T C S N P E H S Q X C E S H C V D G C F C P E G T V L D D I G G X - G C V P V S Q C P Majority

|     | 310               | 320                 | 330                 | 340                             | 350                       |                     |
|-----|-------------------|---------------------|---------------------|---------------------------------|---------------------------|---------------------|
| 304 | C V S P C A R T C | Q S L H I N E M C   | Q E R C V D G C S   | C P E G Q L L D E G             | - - - - L C V E S T E C P | VWF_H_sapiens       |
| 304 | S G S P C M D T C | S H L E V S S L C   | E E H R M D G C F   | C P E G T V Y D D I G D S - G   | C V P V S Q C H           | MUC2_H_sapiens      |
| 304 | S G S P C M D T C | S H L E V S S L C   | E E H H M D G C F   | C P E G T V Y D D I T G S - G   | C I P V S Q C H           | MUC2_C_lupus        |
| 304 | S G S P C M D T C | S H L E V S S L C   | E E H R M D G C F   | C P E G T V Y D D I A G S - G   | C I P V S Q C H           | MUC2_E_caballus     |
| 302 | S S S P C V D T C | S H L E V S S L C   | E E H Y M D G C F   | C P E G T V Y D D I T G S - G   | C I P V S Q C H           | MUC2_M_musculus     |
| 301 | S G S P W L D T C | S H L E V S S L C   | E E H Y M D G C F   | C P E G T V Y D D I T G S - G   | C I P V S Q C H           | MUC2_R_norvegicus   |
| 302 | S S S P C M D T C | S H L E V S S L C   | E E H Y M D G C F   | C P E G T V Y D D I T E N - G   | C I P V S Q C S           | MUC2_G_gallus       |
| 347 | C R S P C A D T C | S N Q E H S R A C   | E D H C V A G C F   | C P E G T V L D D I G Q T - G   | C V P V S K C A           | MUC5AC_H_sapiens    |
| 342 | C G S P C A D T C | S N P E H S Q L C   | E D H C M A G C F   | C P E G M V L D D I G Q T - G   | C I P A S Q C A           | MUC5AC_C_lupus      |
| 346 | C G S P C S D T C | S N R E H S Q L C   | E D H C V A G C F   | C P E G M V L D D I G Q T - G   | C V P V S Q C S           | MUC5AC_E_caballus   |
| 346 | C G S P C V D T C | S N P Q H S Q V C   | E D H C I A G C F   | C P E G M V L D D I N Q M - G   | C V P V S Q C A           | MUC5AC_M_musculus   |
| 346 | C G S P C V D T C | S N P Q H S Q V C   | E D H C V A G C F   | C P E G M V L D D S N Q T - G   | C V P V S Q C A           | MUC5AC_R_norvegicus |
| 338 | C G S P C T D T C | S N P Q R A Q L C   | E D H C V D G C F   | C P P G T V L D D I T H S - G   | C L P L G Q C P           | MUC5B_H_sapiens     |
| 338 | C G S P C A D T C | S N P E R S Q L C   | E D H C V D G C F   | C P P G T V L D D V T H G - G   | C L P L E R C P           | MUC5B_C_lupus       |
| 342 | C S S P C V D T C | S N P Q R S Q L C   | E D H C M D G C F   | C P P G T V L D D V R H L - G   | C L P L E Q C H           | MUC5B_M_musculus    |
| 342 | C S S P C V D T C | S N P Q R S Q L C   | E D H C M D G C F   | C P P G T V L D D V R H L - G   | C L P L E Q C H           | MUC5B_R_norvegicus  |
| 311 | C G S A C V K T C | S N P Q H S - - C   | S S S C T F G C F   | C P E G T V L N D L S N N H T C | V P V T Q C P             | MUC6_H_sapiens      |
| 313 | C G E T C V K T C | S N P Q H T - - C   | S S F C T F G C F   | C P K G T V L D D I S R N H T C | V P V T Q C P             | MUC6_C_lupus        |
| 312 | C G E V C I K T C | S N P Q H S - - C   | S S P C T F G C F   | C P H G T L L D D I S G N Q S C | V P V N Q C P             | MUC6_M_musculus     |
| 311 | C G E V C V K T C | S N P Q H S - - C   | S S F C T F G C F   | C P H G T L L D D I S G N H S C | V P V N Q C P             | MUC6_R_norvegicus   |
| 272 | C G S P C I K T C | S N P E Y S - - C   | S S S H C T Y G C F | C P E G T V L D D I S K N R T C | V H L E Q C P             | MUC6_G_gallus       |
| 858 | C G P S N P A T C | S N V A P F Q - - D | S E C V S G C T C   | P E G Y L L D D I G E K G K C   | V L K A E C P             | MUC19_H_sapiens     |
| 361 | C G P S N P A T C | S D V A P F Q - - D | S E C V N G C I C   | P E G Y L L D D I G R K G Q C   | V L K A E C P             | MUC19_C_lupus       |
| 597 | C G P S N P A T C | S N V A P F Q - - D | T E C V S G C T C   | P E G Y L L D D I G E K G R C   | V L K S D C P             | MUC19_B_taurus      |
| 380 | C G P S N P A T C | S N V A P F Q - - D | S E C V S G C T C   | P E G Y L L D D I G K K G K C   | V L K A Y C P             | MUC19_S_scrofa      |
| 307 | C G P S N P P T C | S N V A P F Q - - D | S E C V S G C T C   | P E G Y L L D D I G E K G K C   | V L K E K C P             | MUC19_M_musculus    |
| 308 | C G P S N P P T C | S N V A P F Q - - D | S E C V S G C T C   | P E G Y L L D D I R E K G K C   | V L K E K C P             | MUC19_R_norvegicus  |
| 425 | C A P T F N P P C | S N Q A P L Q - - E | K G V V A G C A     | C P E G L L V D D M G G N K C   | V P K S S C P             | FIMB1_X_laewis      |



C . . . . . Y . . G . . . . . C . . . C . C . . . . W . C . . . . C . . . C . . . . . All Match Human VWF  
 C . . . G . . Y . P G . . . . . C - . . C . C . . . . W . C . . . . C P G . C . V . G . S H . . Majority Match Human VWF  
 C T L N G H V Y A P G E V R T T D C - S Q C T C X G G R W S C T E L P C P G T C S V E G G S H I T T Majority

|     | 360                                 | 370                                                             | 380 | 390 | 400 |                     |
|-----|-------------------------------------|-----------------------------------------------------------------|-----|-----|-----|---------------------|
| 350 | C V H S G K R Y P P G T S L S R D C | - N T C I C R N S Q W I C S N E E C P G E C L V T G Q S H F K S |     |     |     | VWF_H_sapiens       |
| 353 | C R L H G H L Y T P G Q E I T N D C | - E Q C V C N A G R W V C K D L P C P G T C A L E G G S H I T T |     |     |     | MUC2_H_sapiens      |
| 353 | C R L H G H L Y S P G Q Q I T N E C | - E E C V C T A G R W V C K D L P C P G T C S L E G G S H I T T |     |     |     | MUC2_C_lupus        |
| 353 | C K L Q G H K Y A P G Q Q I T K D C | - E Q C M C N A G R W V C K D R P C P G S C A L E G G S H I T T |     |     |     | MUC2_E_caballus     |
| 351 | C K L H G H L Y M P G Q E F T N D C | - E Q C V C N A G R W V C K D L P C P E T C A L E G G S H I T T |     |     |     | MUC2_M_musculus     |
| 350 | C K L H G H L Y M P G Q E I T N D C | - E Q C V C N A G R W M C K D L P C P E T C A L E G G S H I T T |     |     |     | MUC2_R_norvegicus   |
| 351 | C R L H G K G Y S P G E T I T N E C | - E E C T C D S G R W T C K D L P C P G T C S V E G G S H I K T |     |     |     | MUC2_G_gallus       |
| 396 | C V Y N G A A Y A P G A T Y S T D C | - T N C T C S G G R W S C Q E V P C P G T C S V L G G A H F S T |     |     |     | MUC5AC_H_sapiens    |
| 391 | C V Y N G A T Y A P G A V Y S T D C | - T N C T C L R G Q W S C Q E V P C P G T C S V L G G A H F S T |     |     |     | MUC5AC_C_lupus      |
| 395 | C V Y N G A T Y A S G A V Y S T D C | - T N C T C S G G R W S C Q E V P C L G T C S V L G G A H F S T |     |     |     | MUC5AC_E_caballus   |
| 395 | C L Y N G T L Y A P G T N Y S T D C | - T K C T C S G G Q W S C Q D I P C A G T C S V M G G S H M S T |     |     |     | MUC5AC_M_musculus   |
| 395 | C L Y N G T L Y A P G T S Y S T D C | - T K C T C S G G Q W S C Q E V P C S G T C S V M G G S H I S T |     |     |     | MUC5AC_R_norvegicus |
| 387 | C T H G G R T Y S P G T S F N T T C | - S S C T C S G G L W Q C Q D L P C P G T C S V Q G G A H I S T |     |     |     | MUC5B_H_sapiens     |
| 387 | C T H G G H T Y A P G A S F T T S C | - S S C T C S G G L W Q C Q D L P C P G T C S V Q G G S H I S T |     |     |     | MUC5B_C_lupus       |
| 391 | C T H G G R I Y A P G E S F N T S C | - R S C T C F G G L W K C K D L P C P G T C S V Q G G S H I F T |     |     |     | MUC5B_M_musculus    |
| 391 | C T H G G H I Y A P G E S F N T T C | - S S C T C F G G L W Q C Q D L P C P G T C S V Q G G S H I S T |     |     |     | MUC5B_R_norvegicus  |
| 359 | C V L H G A M Y A P G E V T I A A C | - Q T C R C T L G R W V C T E R P C P G H C S L E G G S F V T T |     |     |     | MUC6_H_sapiens      |
| 361 | C M L N G V V Y A P G E V V T A A C | - Q T C Q C T T G H W K C T E Q P C P Q R C S L E G G S F V T T |     |     |     | MUC6_C_lupus        |
| 360 | C M L N G M V Y G P G E I T K T A C | - Q T C Q C T M G R W T C T K Q P C P G H C S L E G G S F V T T |     |     |     | MUC6_M_musculus     |
| 359 | C M L N G M V Y G P G E I T R T A C | - Q T C Q C T M G H W T C T K Q P C P G H C S L E G G S F V T T |     |     |     | MUC6_R_norvegicus   |
| 320 | C T L N G E T Y A P G D T M K A A C | - R T C K C T M G Q W N C K E L P C P G R C S L E G G S F V T T |     |     |     | MUC6_G_gallus       |
| 906 | C E S S G T V Y Q P G E V R E G P C | G S Q C T C Q D A K W S C T E A L C P G R C K V E - G S S L T T |     |     |     | MUC19_H_sapiens     |
| 409 | C D L H G K I Y Q S G E V R G G P C | G S Q C T C Q D A K W S C T E A L C P G R C K V E - G N S I T T |     |     |     | MUC19_C_lupus       |
| 645 | C E S N G K V Y Q S G E V R E G S C | G S L C T C Q E A K W S C T K T L C P G R C K I E - G S L I T T |     |     |     | MUC19_B_taurus      |
| 428 | C E S N G N V Y Q S G E V R E G P C | G S Q C T C Q E A K W S C T E A L C P G R C K V E - G S L I T T |     |     |     | MUC19_S_scrofa      |
| 355 | C E S N G K V Y K P G K V R E G P C | G S R C T C Q E A K W S C T E A R C P G I C K V E - G S S F T T |     |     |     | MUC19_M_musculus    |
| 356 | C E S N G K V Y K P G E V R E G P C | G S Q C T C Q E A K W S C T E A R C P G I C K V E - G S S F T T |     |     |     | MUC19_R_norvegicus  |
| 473 | C T F R D N T Y Q S G E T R E S T C | N S V C T C N G G T W T C S K G S C P G I C K V E E G V Y V T T |     |     |     | FIMB1_X_laewis      |



. D . . . . . G . C . . . . . All Match Human VWF  
 F D . . . . . G . C . Y . L . . . . . E . . . . . C . . . . . V . . . Majority Match Human VWF  
 F D G R K Y T F H G D C X Y V L T K S - C - - D S F T L L A E L R K C G S T D S E T C L K S V T L L Majority

|     | 410                                                                                                 | 420 | 430 | 440 | 450 |                     |
|-----|-----------------------------------------------------------------------------------------------------|-----|-----|-----|-----|---------------------|
| 399 | F D N R Y F T F S G I C Q Y L L A R D - C Q D H S F S I V I E T V Q C A D D R D A V C T R S V T V R |     |     |     |     | VWF_H_sapiens       |
| 402 | F D G K T Y T F H G D C Y Y V L A K G - D H N D S Y A L L G E L A P C G S T D K Q T C L K T V V L L |     |     |     |     | MUC2_H_sapiens      |
| 402 | F D G K K Y T F H G D C Y Y V L I K G - D H N D S Y A L L G E L A P C G S T D K Q T C L K T V V L L |     |     |     |     | MUC2_C_lupus        |
| 402 | F D G K R Y T F H G D C Y Y V L T K S - D H N D S Y A L L G E L A V C G S T D K Q T C L K T V V L L |     |     |     |     | MUC2_E_caballus     |
| 400 | F D G K K F T F H G D C Y Y V L T K S - E H N D S Y A L L G E L A S C G S T D K Q T C L K T V V L L |     |     |     |     | MUC2_M_musculus     |
| 399 | F D G K K F T F H G D C Y Y V L T K T - K Y N D S Y A L L G E L A S C G S T D K Q T C L K T V V L L |     |     |     |     | MUC2_R_norvegicus   |
| 400 | F D G K K Y T F H G D C Y Y V L A K S - A V N D T H A L L A E L A P C G S S D G Q T C L K T V V L L |     |     |     |     | MUC2_G_gallus       |
| 445 | F D G K Q Y T V H G D C S Y V L T K P - C D S S A F T V L A E L R R C G L T D S E T C L K S V T L S |     |     |     |     | MUC5AC_H_sapiens    |
| 440 | F D E R R Y T V H G D C S Y V L V K P - C N S S T F T V L A E L R K C G L T D T E T C L R S L T L S |     |     |     |     | MUC5AC_C_lupus      |
| 444 | F D E R L Y T V H G D C T Y V L T K P - C N S S A F T V L A E L R K C G L T D S E T C L K S L T L S |     |     |     |     | MUC5AC_E_caballus   |
| 444 | F D G R Q Y T V H G D C T Y V L S K P - C D S N A F T V L V E L R K C G L T E S E T C L K T V T L N |     |     |     |     | MUC5AC_M_musculus   |
| 444 | F D E R Q Y T V H G D C S Y V L C K P - Y D S N A F T V L A E L R K C G L T E S E T C L K T V T L N |     |     |     |     | MUC5AC_R_norvegicus |
| 436 | Y D E K L Y D L H G D C S Y V L S K K - C A D S S F T V L A E L R K C G L T D N E N C L K A V T L S |     |     |     |     | MUC5B_H_sapiens     |
| 436 | Y D E R L Y D V H G D C S Y V L S K K - C T G D L F T V L A E L R T C G L T D N E N C L K S V A L S |     |     |     |     | MUC5B_C_lupus       |
| 440 | F D E K L Y N V H G D C S Y I L T K K - C A D S S F T E L V D L R K C G V T D T E N C L K A V T L N |     |     |     |     | MUC5B_M_musculus    |
| 440 | F D E K L Y N V H G D C S Y I L T K K - C A D S S F T V L V D L R K C G M T D T E N C L K A V T L S |     |     |     |     | MUC5B_R_norvegicus  |
| 408 | F D A R P Y R F H G T C T Y I L L Q S P Q L P E D G A L M A V Y D K S G V S H S E T S L V A V V Y L |     |     |     |     | MUC6_H_sapiens      |
| 410 | F D A R P Y R F H G T C T Y I L L Q S P Q L P D G A S L V A S Y D K S G Y S H S E T A L A A I I Y M |     |     |     |     | MUC6_C_lupus        |
| 409 | F D A R P Y R F H G T C T Y T L L Q S P Q L P N E G T L M A V Y D K S G Y S H S E T S L V A I M Y L |     |     |     |     | MUC6_M_musculus     |
| 408 | F D A R P Y R F H G T C T Y T L L Q S P Q L P N E G T L M A V Y D K S G Y S H S E T S L E S I I Y L |     |     |     |     | MUC6_R_norvegicus   |
| 369 | F D S R S Y R F H G V C T Y I L M K S S S L P H N G T L M A I Y E K S G Y S H S E T S L S A I I Y L |     |     |     |     | MUC6_G_gallus       |
| 955 | F D G V K Y N F P G N C H F L A V H N - - - - E D W S I S V E L R P C P S G Q T G T C L N S V T L L |     |     |     |     | MUC19_H_sapiens     |
| 458 | F D G V K Y H H P G N C H Y L A I Y D - - - - K D W S V S V E L R P C A S G Q S G T C L N S V T L H |     |     |     |     | MUC19_C_lupus       |
| 694 | F D G V K Y N H P G N C H F L A I H D - - - - K D W S I S V E L R P C P S G Q S G T C L N S V T L L |     |     |     |     | MUC19_B_taurus      |
| 477 | F D G V K Y N H P G N C H F L A I H D - - - - K D W S I S V E L R P C Q S G Q S G T C L N S V T L L |     |     |     |     | MUC19_S_scrofa      |
| 404 | F D D N K F S H P G D C H F L A V H N - - - - D E I S I S V E I H P C G N G Q T G S C L T S V M V L |     |     |     |     | MUC19_M_musculus    |
| 405 | F D D N K F S H P G D C H F L A V H N - - - - D E I S I S V E I H P C G D G Q T G S C L T S V M V L |     |     |     |     | MUC19_R_norvegicus  |
| 523 | Y D G I T Y S M H G N C V Y I I S M H - - - - T S W L V Y A K L S Q S Q D A Q S S T I I N S V S L V |     |     |     |     | FIMB1_X_laewis      |

|      | All Match Human VWF      |   |   |   |   |     |   |   |   |   |     |   |   |   |   |     |   |   |   |   |     |   |   |   |   |   |   |   |   |   |   |   |   |   |   |   |   |   |   |   |   |   |   |   |   |   |   |   |               |                   |                     |                    |                  |
|------|--------------------------|---|---|---|---|-----|---|---|---|---|-----|---|---|---|---|-----|---|---|---|---|-----|---|---|---|---|---|---|---|---|---|---|---|---|---|---|---|---|---|---|---|---|---|---|---|---|---|---|---|---------------|-------------------|---------------------|--------------------|------------------|
|      | Majority Match Human VWF |   |   |   |   |     |   |   |   |   |     |   |   |   |   |     |   |   |   |   |     |   |   |   |   |   |   |   |   |   |   |   |   |   |   |   |   |   |   |   |   |   |   |   |   |   |   |   |               |                   |                     |                    |                  |
|      | Majority                 |   |   |   |   |     |   |   |   |   |     |   |   |   |   |     |   |   |   |   |     |   |   |   |   |   |   |   |   |   |   |   |   |   |   |   |   |   |   |   |   |   |   |   |   |   |   |   |               |                   |                     |                    |                  |
|      | 460                      |   |   |   |   | 470 |   |   |   |   | 480 |   |   |   |   | 490 |   |   |   |   | 500 |   |   |   |   |   |   |   |   |   |   |   |   |   |   |   |   |   |   |   |   |   |   |   |   |   |   |   |               |                   |                     |                    |                  |
| 448  | L                        | P | G | L | H | N   | S | L | V | K | L   | K | H | G | A | G   | V | A | M | D | G   | Q | D | V | Q | L | P | - | - | L | L | K | G | D | L | R | I | Q | H | T | V | T | A | S | V | R | L | S | -             | -                 | WVF_H_sapiens       |                    |                  |
| 451  | A                        | D | K | K | K | N   | - | V | V | V | F   | K | S | D | G | S   | V | L | L | N | E   | L | Q | V | N | L | P | - | - | H | V | T | A | S | F | S | V | F | R | P | S | S | Y | H | I | M | V | S | M             | A                 | MUC2_H_sapiens      |                    |                  |
| 451  | A                        | D | N | R | K | N   | - | V | L | A | F   | K | S | D | G | S   | V | L | L | N | E   | L | E | V | N | L | P | - | - | H | V | T | A | S | F | S | V | F | Q | P | S | S | Y | H | L | M | V | N | T             | A                 | MUC2_C_lupus        |                    |                  |
| 451  | A                        | D | K | K | Q | N   | - | V | V | V | F   | K | S | D | G | T   | V | L | L | N | E   | L | Q | V | N | L | P | - | - | H | V | A | A | S | F | S | I | F | Q | P | S | S | H | H | L | I | V | N | T             | A                 | MUC2_E_caballus     |                    |                  |
| 449  | T                        | D | D | K | K | N   | - | V | V | A | F   | K | S | G | G | S   | V | L | L | N | E   | M | E | V | T | L | P | - | - | H | V | A | A | S | F | S | I | F | Q | P | S | S | Y | H | I | V | V | N | T             | K                 | MUC2_M_musculus     |                    |                  |
| 448  | T                        | D | N | K | K | N   | - | V | V | A | F   | K | S | G | G | S   | V | L | L | N | E   | M | E | V | S | L | P | - | - | H | V | A | A | S | F | S | I | F | K | P | S | S | Y | H | I | V | V | N | T             | M                 | MUC2_R_norvegicus   |                    |                  |
| 449  | V                        | D | D | K | K | N   | - | V | V | V | F   | R | S | D | G | S   | V | S | L | N | E   | M | T | V | N | V | P | - | - | H | V | S | A | S | F | S | V | F | K | P | S | S | Y | Y | L | I | V | H | T             | S                 | MUC2_G_gallus       |                    |                  |
| 494  | L                        | D | G | V | Q | T   | - | V | V | V | I   | K | A | S | G | E   | V | F | L | N | Q   | I | Y | T | Q | L | P | - | - | I | S | A | A | N | V | T | I | F | R | P | S | T | F | F | I | I | A | Q | T             | S                 | MUC5AC_H_sapiens    |                    |                  |
| 489  | L                        | G | G | G | H | T   | - | V | I | T | V   | K | A | S | G | E   | V | F | V | N | Q   | I | Y | T | Q | M | P | - | - | I | S | A | G | N | V | T | L | F | R | P | S | T | F | F | I | I | A | Q | T             | N                 | MUC5AC_C_lupus      |                    |                  |
| 493  | L                        | D | G | G | Q | T   | - | V | I | V | V   | K | A | S | G | -   | V | F | V | N | Q   | I | Y | T | Q | L | P | - | - | V | S | A | A | N | V | T | L | F | R | P | S | T | F | F | I | I | V | Q | T             | N                 | MUC5AC_E_caballus   |                    |                  |
| 493  | L                        | G | G | G | Q | T   | - | E | I | M | V   | K | A | T | G | E   | V | F | V | N | Q   | I | Y | T | Q | L | P | - | - | V | S | T | A | N | A | T | F | F | R | P | S | T | F | F | I | I | G | Q | T             | N                 | MUC5AC_M_musculus   |                    |                  |
| 493  | L                        | G | G | G | K | T   | - | V | I | T | V   | K | A | T | G | E   | V | F | V | N | Q   | I | Y | T | Q | L | P | - | - | V | S | T | A | N | A | T | F | F | R | P | S | T | F | F | I | I | G | Q | T             | N                 | MUC5AC_R_norvegicus |                    |                  |
| 485  | L                        | D | G | G | D | T   | - | A | I | R | V   | Q | A | D | G | G   | V | F | L | N | S   | I | Y | T | Q | L | P | - | - | L | S | A | A | N | I | T | L | F | T | P | S | S | F | F | I | V | V | Q | T             | G                 | MUC5B_H_sapiens     |                    |                  |
| 485  | M                        | N | G | G | D | T   | - | I | I | Q | I   | Q | A | N | G | G   | V | F | I | N | S   | I | Y | T | Q | L | P | - | - | V | S | A | A | N | I | T | V | F | R | P | T | S | F | F | I | L | V | H | T             | G                 | MUC5B_C_lupus       |                    |                  |
| 489  | L                        | N | S | G | D | T   | - | V | I | R | I   | Q | V | N | G | A   | V | F | L | N | S   | I | F | T | Q | M | P | - | - | L | S | A | G | N | I | T | I | F | K | P | S | S | F | F | I | I | V | Q | T             | G                 | MUC5B_M_musculus    |                    |                  |
| 489  | L                        | N | S | G | D | M   | - | V | V | R | I   | Q | V | N | G | A   | V | F | L | N | S   | I | F | T | Q | L | P | - | - | L | S | A | G | N | V | T | I | F | R | P | S | S | F | F | V | I | V | Q | V             | G                 | MUC5B_R_norvegicus  |                    |                  |
| 458  | S                        | R | Q | D | K | -   | - | I | V | I | S   | Q | D | E | V | V   | T | N | N | G | E   | A | K | W | L | P | - | - | Y | K | T | R | N | I | T | V | F | R | Q | T | S | T | H | L | Q | M | A | T | S             | MUC6_H_sapiens    |                     |                    |                  |
| 460  | S                        | R | E | D | K | -   | - | I | V | I | S   | Q | D | E | V | F   | T | H | N | G | N   | T | K | W | L | P | - | - | Y | K | T | R | N | I | T | V | F | R | Q | T | S | T | H | I | Q | M | T | T | T             | MUC6_C_lupus      |                     |                    |                  |
| 459  | S                        | K | K | D | K | -   | - | I | V | I | S   | E | D | E | V | I   | T | N | N | G | D   | T | K | L | L | P | - | - | Y | K | T | H | N | I | T | I | F | R | Q | T | S | T | H | L | Q | M | A | T | T             | MUC6_M_musculus   |                     |                    |                  |
| 458  | S                        | K | K | D | K | -   | - | I | V | I | S   | E | D | E | V | I   | T | N | N | G | D   | T | K | L | L | P | - | - | Y | K | T | H | N | I | T | I | F | R | Q | T | S | T | H | L | Q | M | A | T | T             | MUC6_R_norvegicus |                     |                    |                  |
| 419  | S                        | T | K | D | K | -   | - | I | V | I | S   | Q | N | E | L | L   | T | D | D | E | L   | K | R | L | P | - | - | Y | K | S | G | D | I | T | I | F | K | Q | S | S | M | F | I | Q | M | H | T | E | MUC6_G_gallus |                   |                     |                    |                  |
| 1001 | L                        | N | S | S | V | P   | V | D | K | Y | V   | F | N | S | D | G   | T | V | T | N | D   | K | I | R | N | Q | G | - | - | Y | Y | Y | S | D | K | I | Q | I | F | N | A | S | S | S | Y | L | Q | V | E             | Y                 | MUC19_H_sapiens     |                    |                  |
| 504  | L                        | N | S | S | V | S   | V | D | K | Y | V   | F | D | R | N | G   | T | I | T | S | N   | K | I | K | H | K | S | R | Y | D | Y | S | D | G | V | Y | V | F | K | P | S | S | S | Y | L | Q | V | E | T             | N                 | MUC19_C_lupus       |                    |                  |
| 740  | L                        | N | S | S | V | Q   | V | D | K | Y | V   | F | N | R | D | G   | T | V | T | N | D   | K | F | G | N | L | G | - | - | Y | Y | Y | S | D | K | I | Q | I | F | N | A | S | S | S | Y | L | Q | A | E             | Y                 | MUC19_B_taurus      |                    |                  |
| 523  | L                        | N | S | S | V | S   | V | D | K | Y | I   | F | N | R | D | G   | T | V | T | N | D   | K | I | R | N | Q | S | - | - | Y | Y | Y | S | D | K | V | Q | I | F | K | V | S | S | S | Y | L | Q | A | E             | Y                 | MUC19_S_scrofa      |                    |                  |
| 450  | Q                        | N | S | S | S | S   | S | S | N | R | Y   | V | F | N | R | D   | G | T | V | T | K   | D | G | V | I | I | K | G | - | - | Y | Y | Y | S | D | D | V | Q | I | F | N | S | S | S | S | Y | M | Q | A             | E                 | I                   | L                  | MUC19_M_musculus |
| 451  | L                        | N | S | S | T | S   | G | N | R | F | V   | F | N | R | D | G   | T | V | T | K | D   | G | V | I | I | K | G | - | - | Y | Y | Y | S | D | G | V | Q | I | F | N | S | S | S | L | Y | M | Q | A | E             | I                 | L                   | MUC19_R_norvegicus |                  |
| 569  | L                        | N | L | G | N | Q   | E | S | T | Y | T   | F | N | R | D | G   | S | I | I | N | E   | K | M | T | N | Q | N | - | - | V | F | Q | S | D | Q | L | S | I | S | R | - | S | G | T | F | I | I | V | L             | T                 | H                   | FIMB1_X_laewis     |                  |

. . . . . G . C G . . N . . . . D D . . . . . E All Match Human VWF  
 . G . . L Q . . . . . L . V . L . P . . . G . T . G L C G N . N . . . . D D F . T . . G . . E Majority Match Human VWF  
 F G L Q L Q I Q L V P V M Q L F V T L D P X F Q G Q T C G L C G N F N G N Q A D D F M T S S G I V E Majority

|      | 510 |   |   |   |   |   |   |   |   |   | 520 |   |   |   |   |   |   |   |   |   | 530 |   |   |   |   |   |   |   |   |   | 540 |   |   |   |   |   |   |   |   |   | 550 |   |   |   |   |   |   |   |   |   |                     |
|------|-----|---|---|---|---|---|---|---|---|---|-----|---|---|---|---|---|---|---|---|---|-----|---|---|---|---|---|---|---|---|---|-----|---|---|---|---|---|---|---|---|---|-----|---|---|---|---|---|---|---|---|---|---------------------|
| 494  | Y   | G | E | D | L | Q | M | D | W | D | G   | R | G | R | L | L | V | K | L | S | P   | V | Y | A | G | K | T | C | G | L | C   | G | N | Y | N | G | N | Q | G | D | D   | F | L | T | P | S | G | L | A | E | VWF_H_sapiens       |
| 498  | I   | G | V | R | L | Q | V | Q | L | A | P   | V | M | Q | L | F | V | T | L | D | Q   | A | S | Q | G | Q | V | Q | G | L | C   | G | N | F | N | G | L | E | G | D | D   | F | K | T | A | S | G | L | V | E | MUC2_H_sapiens      |
| 498  | F   | G | L | R | L | Q | V | Q | L | L | P   | V | M | Q | L | F | L | T | L | D | Q   | V | A | Q | G | H | V | Q | G | L | C   | G | N | F | N | G | Q | E | G | D | D   | F | K | T | P | G | G | L | V | E | MUC2_C_lupus        |
| 498  | F   | G | L | R | L | Q | V | Q | L | V | P   | V | M | Q | L | F | L | T | L | D | Q   | A | A | Q | G | R | V | Q | G | L | C   | G | N | F | N | G | L | E | G | D | D   | F | Q | T | A | G | G | L | V | E | MUC2_E_caballus     |
| 496  | F   | G | L | R | L | Q | I | Q | L | L | P   | V | M | Q | L | F | V | T | L | D | Q   | A | A | Q | G | Q | V | Q | G | L | C   | G | N | F | N | G | L | E | S | D | D   | F | M | T | S | G | G | M | V | E | MUC2_M_musculus     |
| 495  | F   | G | L | R | L | Q | I | Q | L | V | P   | V | M | Q | L | F | V | T | L | D | Q   | S | A | Q | G | Q | V | Q | G | L | C   | G | N | F | N | G | L | E | S | D | D   | F | M | T | S | G | G | M | V | E | MUC2_R_norvegicus   |
| 496  | F   | G | L | Q | L | Q | I | Q | L | S | P   | V | M | Q | L | F | V | T | A | D | Q   | S | V | Q | D | - | I | Q | G | L | C   | G | N | F | N | G | M | E | G | D | D   | F | K | T | T | N | G | L | V | E | MUC2_G_gallus       |
| 541  | L   | G | L | Q | L | N | L | Q | L | V | P   | T | M | Q | L | F | M | Q | L | A | P   | K | L | R | G | Q | T | C | G | L | C   | G | N | F | N | S | I | Q | A | D | D   | F | R | T | L | S | G | V | V | E | MUC5AC_H_sapiens    |
| 536  | L   | G | L | Q | L | D | I | Q | L | V | P   | I | M | Q | V | F | V | R | L | G | P   | E | L | R | G | L | T | C | G | L | C   | G | N | F | N | Q | N | Q | A | D | D   | F | R | A | L | S | G | V | V | E | MUC5AC_C_lupus      |
| 539  | L   | G | L | Q | L | E | V | Q | L | V | P   | A | M | Q | V | F | V | R | L | A | P   | T | L | R | G | L | T | C | G | L | C   | G | N | F | N | S | V | Q | A | D | D   | F | R | T | L | S | G | V | V | E | MUC5AC_E_caballus   |
| 540  | L   | G | L | Q | L | E | I | Q | L | S | P   | I | M | Q | T | S | V | R | L | K | P   | G | L | R | G | L | T | C | G | L | C   | G | N | F | N | S | M | Q | A | D | D   | F | Q | T | I | S | G | V | V | E | MUC5AC_M_musculus   |
| 540  | L   | G | L | Q | L | E | I | Q | L | H | P   | I | M | Q | V | S | V | R | I | A | P   | E | F | R | G | L | T | S | G | L | C   | G | N | F | N | S | M | Q | A | D | D   | F | Q | T | I | S | G | V | V | E | MUC5AC_R_norvegicus |
| 532  | L   | G | L | Q | L | L | V | Q | L | V | P   | L | M | Q | V | F | V | R | L | D | P   | A | H | Q | G | Q | M | C | G | L | C   | G | N | F | N | Q | N | Q | A | D | D   | F | T | A | L | S | G | V | V | E | MUC5B_H_sapiens     |
| 532  | L   | G | L | Q | L | Q | V | Q | L | V | P   | L | M | Q | V | F | L | R | L | D | P   | S | Y | Q | G | Q | M | C | G | L | C   | G | N | F | N | Q | N | Q | A | D | D   | F | R | A | L | S | G | V | V | E | MUC5B_C_lupus       |
| 536  | M   | G | L | Q | L | Q | V | Q | L | V | P   | L | M | Q | V | F | V | R | L | D | R   | S | Y | Q | G | Q | M | C | G | L | C   | G | N | F | N | Q | N | Q | A | D | D   | F | T | A | L | S | G | V | V | E | MUC5B_M_musculus    |
| 536  | T   | G | L | Q | L | Q | V | Q | L | V | P   | F | M | Q | V | F | V | R | L | D | R   | S | Y | Q | G | Q | M | C | G | L | C   | G | N | F | N | Q | N | Q | A | D | D   | F | T | A | L | S | G | V | V | E | MUC5B_R_norvegicus  |
| 503  | F   | G | L | E | L | V | V | Q | L | R | P   | I | F | Q | A | Y | V | T | V | G | P   | Q | F | R | G | Q | T | R | G | L | C   | G | N | F | N | G | D | T | T | D | D   | F | T | T | S | M | G | I | A | E | MUC6_H_sapiens      |
| 505  | F   | G | L | E | L | V | I | Q | L | E | P   | V | F | Q | A | Y | I | T | I | G | P   | Q | F | R | G | Q | T | R | G | L | C   | G | T | F | N | G | D | T | T | D | D   | F | M | A | S | T | G | I | V | E | MUC6_C_lupus        |
| 504  | F   | G | L | E | L | V | F | Q | M | Q | P   | V | F | Q | V | Y | I | T | V | G | P   | Q | F | K | G | Q | T | R | G | L | C   | G | N | F | N | G | D | T | T | D | D   | F | T | T | S | M | G | I | D | E | MUC6_M_musculus     |
| 503  | F   | G | L | Q | I | M | F | Q | M | Q | P   | V | F | Q | A | Y | I | T | V | G | P   | Q | F | K | G | Q | T | R | G | L | C   | G | N | F | N | G | D | T | T | D | D   | F | T | T | S | M | G | I | D | E | MUC6_R_norvegicus   |
| 464  | F   | G | L | E | L | V | V | Q | T | S | P   | V | F | Q | A | Y | V | K | V | S | A   | Q | F | Q | G | R | T | L | G | L | C   | G | N | Y | N | G | D | T | T | D | D   | F | M | T | S | M | D | I | T | E | MUC6_G_gallus       |
| 1050 | F   | H | V | K | L | Q | I | Q | I | V | P   | V | M | Q | L | Y | V | S | M | P | P   | N | Q | F | T | D | T | V | G | L | C   | G | S | Y | N | N | K | A | E | D | D   | F | M | S | S | Q | N | I | L | E | MUC19_H_sapiens     |
| 554  | F   | G | V | K | M | Q | I | Q | I | A | P   | A | M | Q | L | Y | V | S | L | P | P   | N | D | F | T | E | T | V | G | L | C   | G | S | F | N | N | R | V | E | D | D   | L | M | S | S | Q | N | I | L | E | MUC19_C_lupus       |
| 789  | F   | H | G | K | M | Q | I | Q | I | F | P   | V | M | Q | L | Y | V | S | M | P | P   | N | Q | F | T | D | T | V | G | L | C   | G | S | H | N | N | R | A | E | D | D   | F | M | S | S | Q | N | I | L | E | MUC19_B_taurus      |
| 572  | F   | H | V | K | M | Q | I | Q | I | V | P   | V | M | Q | L | Y | V | S | M | P | P   | N | Q | F | T | D | T | V | G | L | C   | G | S | Y | N | N | R | A | E | D | D   | F | M | S | S | Q | N | I | L | E | MUC19_S_scrofa      |
| 499  | S   | H | I | K | L | Q | I | Q | L | A | P   | R | M | Q | L | Y | V | S | L | A | P   | N | T | S | T | D | T | V | G | L | C   | G | S | F | N | N | K | A | E | D | D   | F | M | S | S | Q | N | I | L | E | MUC19_M_musculus    |
| 500  | S   | H | I | K | L | Q | I | Q | M | V | P   | K | M | Q | L | Y | V | S | L | A | P   | D | T | S | T | D | T | V | G | L | C   | G | S | F | N | N | K | A | E | D | D   | F | M | S | S | Q | K | I | L | E | MUC19_R_norvegicus  |
| 617  | L   | H | V | N | L | L | I | Q | T | G | T   | T | M | Q | F | Y | T | S | V | P | S   | T | G | Y | E | D | T | E | G | P | C   | G | S | F | N | H | K | A | D | D | D   | F | M | S | N | Q | K | M | P | E | FIMB1_X_laewis      |

. . . . . F . . . . . C . . . . . All Match Human VWF  
 . . . . . F . N . W K . . . . . C . . . . . D P C . L . . . . . E . . . . . C . . . . . L . . . . . Majority Match Human VWF  
 G T A A A F A N T W K A Q A C C P N X L N - X E D P C S L S I E N E N Y A E H W C S L L T D S S G P Majority

|      | 560 |   |   |   |   |   |   |   |   |   | 570 |   |   |   |   |   |   |   |   |   | 580 |   |   |   |   |   |   |   |   |   | 590 |   |   |   |   |   |   |   |   |   | 600 |   |   |   |   |   |   |   |   |                    |                     |
|------|-----|---|---|---|---|---|---|---|---|---|-----|---|---|---|---|---|---|---|---|---|-----|---|---|---|---|---|---|---|---|---|-----|---|---|---|---|---|---|---|---|---|-----|---|---|---|---|---|---|---|---|--------------------|---------------------|
| 544  | P   | R | V | E | D | F | G | N | A | W | K   | L | H | G | D | C | Q | D | L | Q | K   | Q | H | S | D | P | C | A | L | N | P   | R | M | T | R | F | S | E | E | A | C   | A | V | L | T | S | P | - | - | T                  | VWF_H_sapiens       |
| 548  | A   | T | G | A | G | F | A | N | T | W | K   | A | Q | S | S | C | H | D | K | L | D   | W | L | D | D | P | C | S | L | N | I   | E | S | A | N | Y | A | E | H | W | C   | S | L | L | K | K | T | E | T | P                  | MUC2_H_sapiens      |
| 548  | A   | T | G | A | S | F | A | N | S | W | K   | A | Q | S | N | C | H | D | K | L | D   | W | L | D | D | P | C | S | L | N | I   | E | S | A | N | Y | A | E | H | W | C   | S | L | L | K | K | T | E | T | P                  | MUC2_C_lupus        |
| 548  | A   | T | G | A | S | F | A | N | T | W | K   | V | Q | S | S | C | P | D | K | L | D   | W | L | D | D | P | C | S | L | N | I   | E | S | A | N | Y | A | E | H | W | C   | S | L | L | R | K | T | E | S | P                  | MUC2_E_caballus     |
| 546  | A   | T | G | A | G | F | A | N | T | W | K   | A | Q | S | S | C | H | D | K | L | D   | W | L | D | D | P | C | S | L | N | I   | E | S | A | N | Y | A | E | H | W | C   | S | L | L | K | R | S | E | T | P                  | MUC2_M_musculus     |
| 545  | A   | T | G | A | G | F | A | N | T | W | K   | A | Q | S | S | C | H | D | K | L | D   | W | L | D | D | P | C | P | L | N | I   | E | S | A | N | Y | A | E | H | W | C   | S | L | L | K | R | S | E | T | P                  | MUC2_R_norvegicus   |
| 545  | A   | T | G | S | A | F | A | N | T | W | K   | A | Q | P | T | C | A | D | Q | A | E   | K | L | E | D | P | C | T | L | S | I   | E | S | A | N | Y | A | E | H | W | C   | S | L | L | K | N | S | E | G | P                  | MUC2_G_gallus       |
| 591  | A   | T | A | A | A | F | F | N | T | F | K   | T | Q | A | A | C | P | N | I | R | N   | S | F | E | D | P | C | S | L | S | V   | E | N | E | K | Y | A | Q | H | W | C   | S | Q | L | T | D | A | D | G | P                  | MUC5AC_H_sapiens    |
| 586  | G   | T | A | A | A | F | A | N | T | W | K   | T | Q | A | T | C | P | N | V | K | N   | S | F | E | D | P | C | S | L | S | V   | E | N | E | K | Y | A | Q | H | W | C   | S | R | L | T | D | P | H | G | P                  | MUC5AC_C_lupus      |
| 589  | G   | T | A | A | A | F | A | N | T | W | K   | T | Q | A | A | C | P | N | V | K | N   | S | F | E | D | P | C | S | L | S | V   | E | N | E | K | Y | A | Q | H | W | C   | S | Q | L | T | D | P | Q | G | P                  | MUC5AC_E_caballus   |
| 590  | G   | T | A | A | A | F | F | N | T | F | K   | T | Q | A | A | C | P | N | V | K | N   | I | F | Q | D | P | C | S | L | S | V   | E | N | E | K | Y | A | Q | H | W | C   | S | L | L | T | N | A | S | G | P                  | MUC5AC_M_musculus   |
| 590  | G   | T | A | A | A | F | F | N | T | F | K   | T | Q | A | A | C | P | N | V | K | N   | I | F | E | D | P | C | S | L | S | V   | E | N | E | K | Y | A | Q | H | W | C   | S | Q | L | T | D | A | N | G | P                  | MUC5AC_R_norvegicus |
| 582  | A   | T | G | A | A | F | A | N | T | W | K   | A | Q | A | A | C | A | N | A | R | N   | S | F | E | D | P | C | S | L | S | V   | E | N | E | N | Y | A | R | H | W | C   | S | R | L | T | D | P | N | S | A                  | MUC5B_H_sapiens     |
| 582  | G   | T | A | A | A | F | A | N | T | W | K   | T | Q | A | A | C | P | N | V | K | N   | S | F | E | D | P | C | S | L | S | V   | E | N | E | N | Y | A | R | H | W | C   | S | L | L | T | D | P | A | G | A                  | MUC5B_C_lupus       |
| 586  | G   | T | G | A | A | F | S | N | T | W | K   | T | Q | A | S | C | P | N | S | K | N   | T | Y | E | D | P | C | S | Y | S | V   | E | N | E | N | F | A | R | E | W | C   | S | M | L | T | E | S | S | G | V                  | MUC5B_M_musculus    |
| 586  | G   | T | G | A | A | F | S | N | T | W | K   | T | Q | A | S | C | P | N | S | K | N   | T | Y | E | D | P | C | S | Y | S | V   | E | N | E | N | F | A | R | E | W | C   | S | M | L | T | E | S | S | G | V                  | MUC5B_R_norvegicus  |
| 553  | G   | T | A | S | L | F | V | D | S | W | R   | A | G | - | N | C | P | A | A | L | E   | R | E | T | D | P | C | S | M | S | Q   | L | N | K | V | C | A | E | T | H | C   | S | M | L | L | R | T | G | T | V                  | MUC6_H_sapiens      |
| 555  | G   | T | A | S | L | F | V | D | S | W | R   | T | G | - | N | C | P | A | S | L | E   | R | E | T | D | P | C | S | M | S | Q   | L | N | K | V | C | A | E | T | H | C   | S | V | L | V | R | N | G | S | V                  | MUC6_C_lupus        |
| 554  | G   | T | A | S | L | F | V | D | S | W | R   | A | G | - | N | C | P | A | A | L | E   | R | E | M | D | P | C | S | M | S | Q   | L | N | K | V | C | A | E | T | H | C   | S | M | L | L | K | K | G | S | V                  | MUC6_M_musculus     |
| 553  | G   | T | A | S | L | F | V | D | S | W | R   | A | G | - | N | C | P | A | A | L | E   | R | E | T | D | P | C | S | M | S | Q   | L | N | K | V | C | A | E | T | H | C   | S | M | L | L | K | K | G | S | V                  | MUC6_R_norvegicus   |
| 514  | G   | T | A | S | L | F | V | D | S | W | R   | A | G | - | N | C | L | P | A | M | E   | R | E | T | D | P | C | A | L | S | Q   | L | N | K | I | S | A | E | T | H | C   | S | I | L | T | K | K | G | T | V                  | MUC6_G_gallus       |
| 1100 | K   | T | S | Q | A | F | A | N | S | W | E   | M | M | S | C | P | K | G | N | - | P   | - | - | - | S | S | C | I | S | I | E   | K | E | K | F | A | E | R | H | C | G   | I | L | L | D | S | S | G | P | MUC19_H_sapiens    |                     |
| 604  | K   | T | P | Q | T | F | A | D | S | W | E   | M | M | P | C | P | K | G | N | - | P   | - | - | - | S | S | C | I | S | I | E   | K | E | I | F | A | E | N | H | C | G   | I | F | L | D | S | P | G | P | MUC19_C_lupus      |                     |
| 839  | K   | T | S | Q | A | F | A | S | S | W | E   | M | M | P | C | P | K | A | S | - | T   | - | - | - | A | S | C | I | S | I | E   | K | E | R | F | A | E | R | H | C | G   | I | L | L | D | L | S | G | P | MUC19_B_taurus     |                     |
| 622  | K   | T | S | Q | A | F | A | N | S | W | E   | M | M | S | C | S | K | G | N | - | T   | - | - | - | A | S | C | I | S | I | E   | K | E | K | F | A | E | K | N | C | G   | I | L | L | D | S | S | G | P | MUC19_S_scrofa     |                     |
| 549  | S   | T | A | Q | A | F | A | N | S | W | E   | M | M | P | C | S | E | G | S | - | P   | - | - | - | S | S | C | V | S | I | E   | T | E | K | F | A | E | S | N | C | E   | I | L | L | S | S | S | G | P | MUC19_M_musculus   |                     |
| 550  | S   | T | A | Q | A | F | A | N | S | W | E   | M | M | P | C | P | K | G | S | - | P   | - | - | - | S | S | C | V | S | I | E   | T | E | K | F | A | E | S | N | C | E   | I | L | L | S | S | S | G | P | MUC19_R_norvegicus |                     |
| 667  | S   | S | P | E | T | F | V | G | F | W | K   | M | S | S | C | S | D | P | V | - | K   | - | - | - | P | T | C | I | D | L | E   | K | E | L | F | A | N | Q | Q | C | S   | Q | L | K | D | P | N | G | A | FIMB1_X_laewis     |                     |

. . . C H . . . . . C . . . . C . . . . . C . . . . . Y . . . C . . . . . All Match Human VWF  
 F . . C H . . V . P . P Y . . . C . . D . C . C . . . . C L C . A L . S Y . . A C A . . G V . . . Majority Match Human VWF  
 F A R C H A X V N P K P Y Y K R C K Y D T C N C E N S E D C L C A A L S S Y V R A C A A K G V L L X Majority

|      | 610 |   |   |   |   |   |   |   |   |   | 620 |   |   |   |   |   |   |   |   |   | 630 |   |   |   |   |   |   |   |   |   | 640 |   |   |   |   |   |   |   |   |   | 650 |   |   |   |   |   |   |   |   |                  |                     |
|------|-----|---|---|---|---|---|---|---|---|---|-----|---|---|---|---|---|---|---|---|---|-----|---|---|---|---|---|---|---|---|---|-----|---|---|---|---|---|---|---|---|---|-----|---|---|---|---|---|---|---|---|------------------|---------------------|
| 592  | F   | E | A | C | H | R | A | V | S | P | L   | P | Y | L | R | N | C | R | Y | D | V   | C | S | C | S | D | G | R | E | C | L   | C | G | A | L | A | S | Y | A | A | A   | C | A | G | R | G | V | R | V | A                | VWF_H_sapiens       |
| 598  | F   | G | R | C | H | S | A | V | D | P | A   | E | Y | Y | K | R | C | K | Y | D | T   | C | N | C | Q | N | N | E | D | C | L   | C | A | A | L | S | S | Y | A | R | A   | C | T | A | K | G | V | M | L | W                | MUC2_H_sapiens      |
| 598  | F   | S | K | C | H | A | A | V | D | P | S   | E | Y | Y | K | R | C | K | Y | D | T   | C | N | C | Q | N | S | E | S | C | M   | C | A | A | L | S | S | Y | A | R | A   | C | A | T | K | G | I | M | L | W                | MUC2_C_lupus        |
| 598  | F   | G | R | C | H | S | V | V | D | P | A   | E | Y | Y | K | R | C | L | Y | D | T   | C | N | C | Q | N | N | E | D | C | L   | C | A | A | L | S | S | Y | A | R | A   | C | A | A | K | G | V | M | L | W                | MUC2_E_caballus     |
| 596  | F   | A | R | C | H | L | A | V | D | P | T   | E | Y | Y | K | R | C | K | Y | D | T   | C | N | C | Q | N | N | E | D | C | M   | C | A | A | L | S | S | Y | A | R | A   | C | A | A | K | G | V | M | L | W                | MUC2_M_musculus     |
| 595  | F   | A | R | C | H | L | A | V | D | P | T   | E | Y | Y | K | R | C | K | Y | D | T   | C | N | C | Q | N | N | E | D | C | M   | C | A | A | L | S | S | Y | A | R | A   | C | A | A | K | G | V | M | L | W                | MUC2_R_norvegicus   |
| 595  | F   | A | R | C | H | S | V | I | D | P | A   | E | Y | Y | K | R | C | K | Y | D | T   | C | L | C | K | D | N | E | E | C | L   | C | A | A | L | S | S | Y | S | R | A   | C | A | F | K | G | I | I | L | G                | MUC2_G_gallus       |
| 641  | F   | G | R | C | H | A | A | V | K | P | G   | T | Y | Y | S | N | C | M | F | D | T   | C | N | C | E | R | S | E | D | C | L   | C | A | A | L | S | S | Y | V | H | A   | C | A | A | K | G | V | Q | L | G                | MUC5AC_H_sapiens    |
| 636  | F   | A | Q | C | H | T | A | V | N | P | G   | T | Y | Y | S | N | C | M | F | D | T   | C | N | C | E | K | S | E | D | C | L   | C | A | A | L | S | S | Y | V | H | A   | C | A | A | N | G | V | L | L | S                | MUC5AC_C_lupus      |
| 639  | F   | A | G | C | H | G | A | V | N | P | S   | S | Y | Y | S | N | C | M | F | D | T   | C | N | C | E | K | S | E | V | C | L   | C | A | A | L | S | S | Y | V | W | A   | C | A | A | R | G | V | L | L | S                | MUC5AC_E_caballus   |
| 640  | F   | S | Q | C | H | A | T | V | N | P | S   | T | F | F | S | N | C | M | Y | D | T   | C | N | C | E | K | S | E | D | C | M   | C | A | A | L | S | S | Y | V | R | A   | C | A | A | K | G | V | L | L | S                | MUC5AC_M_musculus   |
| 640  | F   | S | Q | C | H | A | T | V | N | P | S   | T | F | F | S | N | C | M | F | D | T   | C | N | C | E | K | S | E | D | C | L   | C | A | A | L | S | S | Y | V | R | A   | C | A | A | K | G | V | L | L | S                | MUC5AC_R_norvegicus |
| 632  | F   | S | R | C | H | S | I | I | N | P | K   | P | F | H | S | N | C | M | F | D | T   | C | N | C | E | R | S | E | D | C | L   | C | A | A | L | S | S | Y | V | H | A   | C | A | A | K | G | V | Q | L | S                | MUC5B_H_sapiens     |
| 632  | F   | S | R | C | H | S | I | L | N | P | A   | P | F | H | S | N | C | M | F | D | T   | C | N | C | E | K | S | E | D | C | L   | C | A | A | L | S | S | Y | V | H | A   | C | A | T | K | G | V | L | L | S                | MUC5B_C_lupus       |
| 636  | F   | S | A | C | H | A | T | V | S | P | V   | P | F | Y | S | N | C | L | F | D | T   | C | N | C | E | N | S | E | D | C | M   | C | A | A | L | S | S | Y | V | F | A   | C | A | A | K | G | V | L | L | S                | MUC5B_M_musculus    |
| 636  | F   | S | A | C | H | A | T | V | S | P | V   | P | F | Y | S | N | C | L | F | D | T   | C | N | C | E | N | S | E | D | C | M   | C | A | A | L | S | S | Y | V | R | A   | C | A | A | K | G | V | L | L | S                | MUC5B_R_norvegicus  |
| 602  | F   | E | R | C | H | A | T | V | N | P | A   | P | F | Y | K | R | C | V | Y | Q | A   | C | N | Y | E | E | T | F | P | H | I   | C | A | A | L | G | D | Y | V | H | A   | C | S | L | R | G | V | L | L | W                | MUC6_H_sapiens      |
| 604  | F   | E | K | C | H | A | M | V | N | P | R   | P | F | Y | K | R | C | V | Y | Q | A   | C | N | Y | E | K | T | I | L | H | V   | C | A | A | L | S | D | Y | A | R | V   | C | A | T | R | G | I | L | L | R                | MUC6_C_lupus        |
| 603  | F   | E | K | C | H | S | V | V | N | P | Q   | P | F | Y | K | R | C | V | Y | Q | A   | C | N | Y | E | E | T | F | P | H | I   | C | S | A | L | G | A | Y | A | H | A   | C | S | A | R | G | I | L | L | W                | MUC6_M_musculus     |
| 602  | F   | E | K | C | H | N | V | V | N | P | Q   | P | F | Y | K | R | C | V | Y | Q | A   | C | N | Y | E | E | T | F | P | H | I   | C | S | A | L | G | A | Y | A | H | A   | C | S | S | R | G | V | L | L | W                | MUC6_R_norvegicus   |
| 563  | F   | E | T | C | H | A | V | V | N | P | T   | P | F | Y | K | R | C | V | Y | Q | A   | C | N | Y | E | E | T | F | P | Y | I   | C | S | A | L | G | S | Y | A | R | T   | C | S | S | M | G | L | I | L | E                | MUC6_G_gallus       |
| 1145 | L   | A | S | C | H | P | I | V | N | P | K   | P | Y | H | E | E | C | K | Y | T | C   | T | C | E | N | S | Q | D | C | L | C   | T | I | L | G | N | Y | V | K | A | C   | A | E | K | E | T | Y | I | V | MUC19_H_sapiens  |                     |
| 649  | F   | A | S | C | H | P | I | V | N | V | K   | P | Y | H | E | E | C | K | R | Y | T   | C | T | C | K | N | S | K | D | C | L   | C | T | I | F | G | N | Y | V | K | A   | C | A | E | K | E | V | Y | M | V                | MUC19_C_lupus       |
| 884  | F   | A | S | C | H | S | I | V | D | P | K   | P | Y | H | E | E | C | K | Y | T | C   | T | C | E | N | S | Q | D | C | L | C   | T | I | L | G | N | Y | V | K | A | C   | A | E | K | E | T | S | M | V | MUC19_B_taurus   |                     |
| 667  | F   | A | S | C | H | P | I | V | N | P | K   | P | Y | H | E | E | C | K | Y | T | C   | A | C | E | N | S | K | D | C | L | C   | T | I | L | G | N | Y | V | K | A | C   | A | E | K | E | T | Y | I | V | MUC19_S_scrofa   |                     |
| 594  | F   | A | A | C | H | Q | T | V | N | P | K   | F | Y | H | E | E | C | K | Y | T | C   | S | C | E | N | G | Q | D | C | L | C   | T | V | L | G | N | Y | V | K | A | C   | A | E | K | E | I | Y | L | V | MUC19_M_musculus |                     |
| 595  | F   | A | A | C | H | Q | T | V | D | P | K   | F | Y | H | E | E | C | K | R | Y | T   | C | S | C | E | N | S | Q | D | C | L   | C | T | V | L | G | N | Y | V | K | A   | C | A | E | K | E | T | Y | L | V                | MUC19_R_norvegicus  |
| 712  | F   | A | K | C | H | S | T | V | L | Y | R   | S | F | Y | E | R | C | V | H | L | T   | C | I | S | Q | D | M | T | V | S | M   | C | T | E | L | R | N | Y | A | M | A   | C | A | E | Q | G | I | Y | I | H                | FIMB1_X_laewis      |

. . . . . C . . . . . C . . . . . C . . . . . C . . . . . All Match Human VWF  
 . . . . . C . . . . . C P . . . . . C . . . . . T C R S L S . . . . . D . . . . . C . . . . . G Majority Match Human VWF  
 G W R D G V C N K S X - - C P K S Q V F X Y N V X T C Q P T C R S L S E R D V T C H V S F V P V D G Majority

|      | 660 |   |   |   |   |   |   |   |   |   | 670 |   |   |   |   |   |   |   |   |   | 680 |   |   |   |   |   |   |   |   |   | 690 |   |   |   |   |   |   |   |   |   | 700 |   |   |   |   |   |   |   |   |                  |                     |
|------|-----|---|---|---|---|---|---|---|---|---|-----|---|---|---|---|---|---|---|---|---|-----|---|---|---|---|---|---|---|---|---|-----|---|---|---|---|---|---|---|---|---|-----|---|---|---|---|---|---|---|---|------------------|---------------------|
| 642  | W   | R | E | P | G | R | C | E | - | - | L   | N | C | P | K | G | Q | V | Y | L | Q   | C | G | T | P | C | N | L | T | C | R   | S | L | S | Y | P | D | E | E | C | N   | E | A | C | L | - | - | E | G | VWF_H_sapiens    |                     |
| 648  | G   | W | R | E | H | V | C | N | K | D | V   | G | S | C | P | N | S | Q | V | F | L   | Y | N | L | T | T | C | Q | Q | T | C   | R | S | L | S | E | A | D | S | H | C   | L | E | G | F | A | P | V | D | G                | MUC2_H_sapiens      |
| 648  | G   | W | R | E | Q | V | C | N | E | D | V   | G | S | C | P | N | S | Q | V | F | L   | Y | N | L | T | T | C | Q | Q | T | C   | R | S | L | S | E | A | D | T | H | C   | V | Q | G | F | A | P | V | D | G                | MUC2_C_lupus        |
| 648  | G   | W | R | E | N | I | C | N | K | D | V   | G | S | C | P | N | S | Q | I | F | L   | Y | N | L | T | T | C | Q | Q | T | C   | R | S | L | S | E | A | D | A | H | C   | L | Q | G | F | A | P | V | D | G                | MUC2_E_caballus     |
| 646  | G   | W | R | E | R | V | C | N | K | D | V   | H | A | C | P | S | S | Q | I | F | M   | Y | N | L | T | T | C | Q | Q | T | C   | R | S | L | S | E | G | D | S | H | C   | L | K | G | F | A | P | V | E | G                | MUC2_M_musculus     |
| 645  | G   | W | R | E | S | V | C | N | K | D | V   | H | A | C | P | S | S | Q | I | F | M   | Y | N | L | T | T | C | Q | Q | T | C   | R | S | I | S | E | G | D | T | H | C   | L | K | G | F | A | P | V | E | G                | MUC2_R_norvegicus   |
| 645  | G   | W | R | Q | S | V | C | S | D | E | V   | S | A | C | P | G | N | Q | V | F | L   | Y | N | L | T | M | C | Q | Q | T | C   | R | S | I | A | D | G | E | K | Y | C   | L | Q | D | F | A | P | V | D | G                | MUC2_G_gallus       |
| 691  | G   | W | R | D | G | V | C | T | K | P | M   | T | T | C | P | K | S | M | T | Y | H   | Y | H | V | S | T | C | Q | P | T | C   | R | S | L | S | E | G | D | I | T | C   | S | V | G | F | I | P | V | D | G                | MUC5AC_H_sapiens    |
| 686  | G   | W | R | D | S | V | C | T | K | P | M   | A | T | C | P | K | S | L | T | Y | Q   | Y | H | I | D | T | C | Q | P | T | C   | R | S | R | S | H | E | D | I | T | C   | G | I | N | F | V | P | V | D | G                | MUC5AC_C_lupus      |
| 689  | G   | W | R | D | G | V | C | T | K | P | M   | T | T | C | P | K | S | M | T | Y | Q   | Y | H | I | S | T | C | Q | P | T | C   | R | A | R | S | E | D | D | V | T | C   | G | I | S | F | V | P | V | D | G                | MUC5AC_E_caballus   |
| 690  | D   | W | R | D | G | I | C | T | K | P | T   | I | T | C | P | K | S | M | T | Y | Q   | Y | H | I | S | T | C | Q | P | T | C   | R | A | L | N | E | K | D | V | T | C   | H | V | S | F | I | P | V | D | G                | MUC5AC_M_musculus   |
| 690  | D   | W | R | E | G | I | C | A | K | P | T   | I | T | C | P | K | S | M | T | Y | Q   | Y | H | I | S | T | C | Q | P | T | C   | R | S | L | S | E | E | D | V | T | C   | H | V | N | F | I | P | V | D | G                | MUC5AC_R_norvegicus |
| 682  | D   | W | R | D | G | V | C | T | K | Y | M   | Q | N | C | P | K | S | Q | R | Y | A   | Y | V | V | D | A | C | Q | P | T | C   | R | G | L | S | E | A | D | V | T | C   | S | V | S | F | V | P | V | D | G                | MUC5B_H_sapiens     |
| 682  | S   | W | R | D | G | V | C | T | K | Y | M   | S | S | C | P | K | S | Q | N | Y | T   | Y | V | V | D | S | C | Q | P | T | C   | R | A | L | S | Q | V | D | V | T | C   | G | V | S | F | V | P | V | D | G                | MUC5B_C_lupus       |
| 686  | G   | W | R | D | K | V | C | Y | K | Y | T   | N | N | C | P | Q | T | K | G | Y | F   | Y | S | V | S | C | Q | P | T | C | R   | S | L | S | E | A | D | V | T | C | S   | V | P | F | V | T | V | D | G | MUC5B_M_musculus |                     |
| 686  | G   | W | R | G | K | A | C | Y | K | Y | M   | N | N | C | P | Q | T | K | E | Y | S   | Y | S | V | S | T | C | Q | P | T | C   | R | S | L | S | E | V | D | V | T | C   | S | I | P | F | V | P | V | D | G                | MUC5B_R_norvegicus  |
| 652  | G   | W | R | S | S | V | D | N | - | C | T   | I | P | C | T | G | N | T | T | F | S   | Y | N | S | Q | A | C | E | R | T | C   | L | S | L | S | D | R | A | T | E | C   | H | H | S | A | V | P | V | D | G                | MUC6_H_sapiens      |
| 654  | D   | W | R | N | S | V | D | N | - | C | T   | T | P | C | T | G | N | Q | T | F | G   | Y | D | T | R | A | C | G | R | T | C   | L | S | L | S | D | H | A | A | E | C   | H | P | S | A | V | P | V | D | G                | MUC6_C_lupus        |
| 653  | G   | W | R | N | S | V | D | N | - | C | T   | V | P | C | T | G | N | R | T | F | S   | Y | D | S | Q | A | C | D | R | T | C   | L | S | L | S | D | R | E | T | E | C   | H | V | S | P | V | P | V | D | G                | MUC6_M_musculus     |
| 652  | G   | W | R | N | S | V | D | N | - | C | T   | V | P | C | S | G | N | R | T | F | S   | Y | D | S | K | A | C | D | R | T | C   | L | S | L | S | D | R | E | T | E | C   | H | A | S | P | V | P | V | D | G                | MUC6_R_norvegicus   |
| 613  | N   | W | R | N | S | M | D | N | - | C | T   | I | T | C | T | G | N | Q | T | F | S   | Y | N | T | Q | A | C | E | R | T | C   | L | S | L | S | N | P | T | L | E | C   | H | P | T | D | I | P | I | E | G                | MUC6_G_gallus       |
| 1195 | G   | W | R | T | G | L | C | E | H | S | -   | - | - | C | P | S | G | L | V | F | K   | Y | N | V | K | A | C | N | S | S | C   | R | S | L | S | E | R | D | R | S | C   | D | V | E | D | V | P | V | D | G                | MUC19_H_sapiens     |
| 699  | G   | W | R | T | G | L | C | D | S | S | -   | - | - | C | P | S | N | L | V | F | K   | Y | N | I | K | A | C | N | K | T | C   | R | S | L | S | E | R | Y | R | S | C   | D | I | E | G | V | P | F | D | G                | MUC19_C_lupus       |
| 934  | G   | W | R | A | G | L | C | D | Q | S | -   | - | - | C | P | S | G | L | V | F | K   | Y | N | V | K | T | C | N | S | S | C   | R | S | L | S | E | R | D | K | S | C   | D | M | E | G | I | S | V | D | G                | MUC19_B_taurus      |
| 717  | G   | W | R | A | E | L | C | D | H | S | -   | - | - | C | P | S | G | L | V | F | K   | Y | N | V | K | A | C | N | S | S | C   | R | S | L | S | E | R | D | R | S | C   | D | V | E | D | V | P | I | D | G                | MUC19_S_scrofa      |
| 644  | G   | W | R | D | G | L | C | E | V | S | -   | - | - | C | P | S | G | L | V | F | N   | Y | K | V | K | T | C | N | S | S | C   | R | S | L | S | A | R | D | R | S | C   | D | I | E | D | I | P | V | D | G                | MUC19_M_musculus    |
| 645  | G   | W | R | D | G | L | C | E | V | S | -   | - | - | C | P | T | G | L | V | F | N   | Y | K | V | K | T | C | N | S | S | C   | R | S | L | S | A | R | D | R | S | C   | D | I | E | D | I | L | V | D | G                | MUC19_R_norvegicus  |
| 762  | E   | W | G | N | E | L | C | K | E | E | -   | - | - | C | K | N | N | Q | V | L | D   | Y | H | Y | V | S | C | Y | Q | T | C   | F | S | I | S | N | G | D | S | S | C   | V | P | G | G | I | K | A | L | L                | FIMB1_X_laewis      |



C . C . . . . . C V . . . . C . C . . . . . C . C . . . . All Match Human VWF  
 C . C P . G . Y . . . . G . C V P . . . C P C Y . . G - . . . . . C . C . . G . Majority Match Human VWF  
 C T C P D G T X L N D K G X C V P K S Q C P C Y L H G - X V V Q P G E S V H I N G X I C V C R N G R Majority

|      | 710 |   |   |   |   |   |   |   |   |   | 720 |   |   |   |   |   |   |   |   |   | 730 |   |   |   |   |   |   |   |   |   | 740 |   |   |   |   |   |   |   |   |   | 750 |   |   |   |   |   |   |   |   |   |                     |                   |
|------|-----|---|---|---|---|---|---|---|---|---|-----|---|---|---|---|---|---|---|---|---|-----|---|---|---|---|---|---|---|---|---|-----|---|---|---|---|---|---|---|---|---|-----|---|---|---|---|---|---|---|---|---|---------------------|-------------------|
| 687  | C   | F | C | P | P | G | L | Y | M | D | E   | R | G | D | C | V | P | K | A | Q | C   | P | C | Y | Y | D | G | - | E | I | F   | Q | P | E | D | I | F | S | D | H | H   | T | M | C | Y | C | E | D | G | F | VWF_H_sapiens       |                   |
| 698  | C   | G | C | P | D | H | T | F | L | D | E   | K | G | R | C | V | P | L | A | K | C   | S | C | Y | H | R | G | - | L | Y | L   | E | A | G | D | V | V | V | R | Q | E   | E | R | C | V | C | R | D | G | R | MUC2_H_sapiens      |                   |
| 698  | C   | G | C | P | V | H | T | F | L | D | E   | K | G | R | C | V | S | L | A | K | C   | S | C | Y | Y | H | G | - | L | Y | L   | E | A | G | E | V | V | L | R | Q | E   | E | R | C | V | C | R | N | G | R | MUC2_C_lupus        |                   |
| 698  | C   | G | C | P | D | R | T | F | L | D | E   | K | G | R | C | V | P | L | A | K | C   | S | C | Y | H | R | G | - | L | Y | L   | E | A | G | E | V | V | L | R | Q | E   | E | R | C | M | C | R | N | G | R | MUC2_E_caballus     |                   |
| 696  | C   | G | C | P | D | H | T | F | M | D | E   | K | G | R | C | V | P | L | A | K | C   | S | C | Y | H | H | G | - | L | Y | L   | E | A | G | D | V | I | L | R | Q | E   | E | R | C | I | C | R | N | G | R | MUC2_M_musculus     |                   |
| 695  | C   | G | C | P | D | H | T | F | M | D | E   | K | G | R | C | V | P | L | S | K | C   | S | C | Y | H | H | G | - | L | Y | L   | E | A | G | D | V | I | L | R | Q | E   | E | R | C | I | C | R | N | G | R | MUC2_R_norvegicus   |                   |
| 695  | C   | G | C | P | D | N | T | Y | L | D | N   | Q | D | T | C | V | P | I | S | K | C   | P | C | Y | Y | K | G | - | S | Y | L   | E | P | G | E | Y | V | T | K | D | G   | E | R | C | V | C | R | N | A | K | MUC2_G_gallus       |                   |
| 741  | C   | I | C | P | K | G | T | F | L | D | D   | T | G | K | C | V | Q | A | S | N | C   | P | C | Y | H | R | G | - | S | M | I   | P | N | G | E | S | V | H | D | S | G   | A | I | C | T | C | T | H | G | K | MUC5AC_H_sapiens    |                   |
| 736  | C   | T | C | P | T | G | T | F | M | D | D   | T | G | K | C | V | P | P | T | S | C   | P | C | Y | H | G | G | - | S | M | V   | P | N | G | E | S | L | H | E | R | G   | A | I | C | T | C | T | Q | G | M | MUC5AC_C_lupus      |                   |
| 739  | C   | T | C | P | N | D | T | F | L | D | D   | T | G | K | C | V | P | A | T | S | C   | P | C | Y | L | G | G | - | S | V | V   | P | N | G | E | S | L | H | E | S | G   | A | V | C | T | C | T | Q | G | R | MUC5AC_E_caballus   |                   |
| 740  | C   | T | C | P | K | G | T | F | L | D | D   | L | G | K | C | V | Q | A | T | S | C   | P | C | Y | Y | K | G | - | S | T | V   | P | N | G | E | S | V | Q | D | S | G   | A | I | C | T | C | T | Q | G | A | MUC5AC_M_musculus   |                   |
| 740  | C   | T | C | P | K | G | T | F | L | D | D   | S | G | K | C | V | Q | A | T | S | C   | P | C | Y | Y | K | G | - | S | P | V   | P | N | G | E | S | V | H | D | N | G   | A | I | C | T | C | T | Q | G | A | MUC5AC_R_norvegicus |                   |
| 732  | C   | T | C | P | A | G | T | F | L | N | D   | A | G | A | C | V | P | A | Q | E | C   | P | C | Y | A | H | G | - | T | V | L   | A | P | G | E | V | V | H | D | E | G   | A | V | C | S | C | T | G | G | K | MUC5B_H_sapiens     |                   |
| 732  | C   | V | C | P | S | G | T | F | L | D | D   | A | G | A | C | V | S | A | E | A | C   | P | C | Y | F | H | S | - | S | V | V   | A | P | G | E | V | V | H | D | N | G   | V | V | C | S | C | A | G | G | K | MUC5B_C_lupus       |                   |
| 736  | C   | T | C | P | E | G | T | F | L | N | D   | K | D | H | C | V | P | V | E | E | C   | P | C | Y | F | H | G | - | T | V | V   | A | P | R | E | V | V | T | D | N | G   | V | V | C | S | C | T | N | G | K | MUC5B_M_musculus    |                   |
| 736  | C   | T | C | P | E | G | T | F | L | N | D   | K | D | H | C | V | P | V | E | E | C   | P | C | Y | F | H | G | - | T | V | V   | A | S | G | E | V | V | M | D | N | G   | V | V | C | S | C | T | N | G | K | MUC5B_R_norvegicus  |                   |
| 701  | C   | N | C | P | D | G | T | Y | L | N | Q   | K | G | E | C | V | R | K | A | Q | C   | P | C | I | L | E | G | - | Y | K | F   | I | L | A | E | Q | S | T | V | I | N   | G | I | T | C | H | C | I | N | G | R                   | MUC6_H_sapiens    |
| 703  | C   | N | C | P | E | G | T | Y | L | N | H   | K | A | Q | C | V | R | K | S | Q | C   | P | C | L | L | D | S | - | N | K | F   | I | L | A | D | Q | S | A | M | V | N   | G | V | I | C | Y | C | I | N | G | R                   | MUC6_C_lupus      |
| 702  | C   | N | C | P | E | G | T | Y | L | N | H   | K | A | E | C | V | H | K | A | Q | C   | P | C | L | L | D | S | - | H | K | F   | V | Q | A | D | Q | S | T | M | I | N   | G | V | I | C | H | C | I | N | G | R                   | MUC6_M_musculus   |
| 701  | C   | N | C | P | E | G | T | Y | L | N | H   | K | A | E | C | V | H | K | T | Q | C   | P | C | L | L | D | S | - | H | K | F   | V | Q | A | D | Q | S | T | M | I | N   | G | V | I | C | Y | C | I | N | G | R                   | MUC6_R_norvegicus |
| 662  | C   | N | C | P | K | G | M | Y | L | N | H   | K | N | E | C | V | R | K | S | H | C   | P | C | Y | L | E | D | R | - | K | Y   | I | L | P | D | Q | S | T | M | T | G   | G | I | T | C | Y | C | V | N | G | R                   | MUC6_G_gallus     |
| 1242 | C   | T | C | P | D | A | M | Y | Q | N | N   | E | G | N | C | V | L | K | S | Q | C   | D | C | Y | I | N | D | - | E | V | M   | Q | P | G | K | L | I | H | I | D | D   | N | K | C | V | C | R | D | G | I | MUC19_H_sapiens     |                   |
| 746  | C   | T | C | P | D | G | M | Y | Q | N | N   | E | G | N | C | V | P | K | S | Q | C   | D | C | Y | V | S | G | - | E | V | M   | K | P | G | K | L | I | N | I | N | N   | N | K | C | I | C | R | D | G | I | MUC19_C_lupus       |                   |
| 981  | C   | T | C | P | D | G | M | Y | K | N | N   | E | G | N | C | V | S | K | S | Q | C   | D | C | Y | I | N | D | - | E | V | M   | Q | P | G | K | L | I | H | I | D | D   | N | K | C | V | C | R | D | G | I | MUC19_B_taurus      |                   |
| 764  | C   | T | C | P | D | G | M | Y | H | N | N   | E | G | T | C | V | P | K | S | Q | C   | D | C | Y | I | N | D | - | E | V | M   | Q | P | G | K | L | I | H | I | G | N   | N | K | C | V | C | R | D | G | I | MUC19_S_scrofa      |                   |
| 691  | C   | T | C | P | D | G | M | Y | Q | N | N   | E | G | N | C | V | Q | K | S | E | C   | D | C | Y | V | N | D | - | E | I | V   | Q | P | G | K | S | I | L | I | D | D   | N | K | C | V | C | Q | D | G | V | MUC19_M_musculus    |                   |
| 692  | C   | T | C | P | D | G | M | Y | Q | N | N   | E | G | N | C | V | Q | K | S | E | C   | D | C | Y | V | E | D | - | E | T | V   | Q | P | G | K | S | I | L | I | D | D   | N | K | C | V | C | Q | D | G | V | MUC19_R_norvegicus  |                   |
| 809  | C   | G | C | S | E | G | Q | Y | P | N | A   | D | G | V | C | V | P | K | G | D | C   | D | C | H | L | N | Y | - | D | T | L   | K | A | N | E | T | I | V | I | D | E   | R | E | C | A | C | I | D | G | R | FIMB1_X_laewis      |                   |

. . C . . . . . C . . . . . C . . . . . All Match Human VWF  
 . . C . . . . . C . . P . . . . . C . . . . . G Majority Match Human VWF  
 L S C X G P L L L - - - - - L Q S C S A P X V Y V D C N N A T A G A R G Majority

|      | 760 |   |   |   |   |   |   |   |   |   | 770 |   |   |   |   |   |   |   |   |   | 780 |   |   |   |   |   |   |   |   |   | 790 |   |   |   |   |   |   |   |   |   | 800 |   |   |   |   |   |   |   |   |   |                    |                     |                    |
|------|-----|---|---|---|---|---|---|---|---|---|-----|---|---|---|---|---|---|---|---|---|-----|---|---|---|---|---|---|---|---|---|-----|---|---|---|---|---|---|---|---|---|-----|---|---|---|---|---|---|---|---|---|--------------------|---------------------|--------------------|
| 736  | M   | H | C | T | M | S | G | V | P | G | S   | L | L | P | D | A | V | L | S | S | P   | L | S | H | R | S | K | R | S | L | S   | C | R | P | P | M | V | K | L | V | C   | P | A | D | N | L | R | A | E | G | VWF_H_sapiens      |                     |                    |
| 747  | L   | H | C | R | Q | I | R | L | I | - | -   | - | - | - | - | - | - | - | - | - | -   | - | - | - | - | - | - | - | G | Q | S   | C | T | A | P | K | I | H | M | D | C   | S | N | L | T | A | L | A | T | S | MUC2_H_sapiens     |                     |                    |
| 747  | L   | H | C | M | Q | V | K | L | L | - | -   | - | - | - | - | - | - | - | - | - | -   | - | - | - | - | - | - | - | G | Q | S   | C | P | S | P | K | I | H | I | D | C   | N | N | L | T | A | V | A | I | Q | MUC2_C_lupus       |                     |                    |
| 747  | L   | H | C | I | P | V | K | L | I | - | -   | - | - | - | - | - | - | - | - | - | -   | - | - | - | - | - | - | - | G | E | T   | C | K | A | P | K | I | H | I | D | C   | N | N | Q | T | A | L | S | I | R | MUC2_E_caballus    |                     |                    |
| 745  | L   | Q | C | T | Q | V | K | L | I | - | -   | - | - | - | - | - | - | - | - | - | -   | - | - | - | - | - | - | - | G | H | T   | C | Q | Y | P | K | I | L | V | D | C   | N | N | L | T | A | L | A | V | R | MUC2_M_musculus    |                     |                    |
| 744  | L   | Q | C | T | Q | V | K | L | I | - | -   | - | - | - | - | - | - | - | - | - | -   | - | - | - | - | - | - | - | G | H | T   | C | L | S | P | Q | I | L | V | D | C   | N | N | L | T | A | L | A | I | R | MUC2_R_norvegicus  |                     |                    |
| 744  | I   | R | C | T | S | V | T | M | R | - | -   | - | - | - | - | - | - | - | - | - | -   | - | - | - | - | - | - | - | M | K | K   | C | P | S | N | K | T | Y | F | D | C   | N | A | S | P | D | W | T | S | R | MUC2_G_gallus      |                     |                    |
| 790  | L   | S | C | I | G | G | Q | A | P | - | -   | - | - | - | - | - | - | - | - | - | -   | - | - | - | - | - | - | - | A | P | V   | C | A | A | P | M | V | F | F | D | C   | R | N | A | T | P | G | D | T | G | MUC5AC_H_sapiens   |                     |                    |
| 785  | L   | T | C | I | G | G | Q | V | P | - | -   | - | - | - | - | - | - | - | - | - | -   | - | - | - | - | - | - | - | T | P | V   | C | T | P | P | M | V | Y | L | D | C   | R | N | A | T | P | G | A | T | G | MUC5AC_C_lupus     |                     |                    |
| 788  | L   | T | C | I | G | G | H | T | P | - | -   | - | - | - | - | - | - | - | - | - | -   | - | - | - | - | - | - | - | - | A | P   | V | C | A | S | P | M | V | Y | F | D   | C | R | N | A | T | P | G | A | A | G                  | MUC5AC_E_caballus   |                    |
| 789  | L   | T | C | I | G | G | P | A | P | - | -   | - | - | - | - | - | - | - | - | - | -   | - | - | - | - | - | - | - | - | T | P   | V | C | D | A | P | M | I | Y | F | D   | C | H | N | A | T | P | G | D | T | G                  | MUC5AC_M_musculus   |                    |
| 789  | L   | T | C | I | G | G | P | V | L | - | -   | - | - | - | - | - | - | - | - | - | -   | - | - | - | - | - | - | - | - | T | P   | V | C | D | A | P | M | I | Y | F | D   | C | R | N | A | T | P | G | D | T | G                  | MUC5AC_R_norvegicus |                    |
| 781  | L   | S | C | L | G | A | S | L | Q | K | -   | - | - | - | - | - | - | - | - | - | -   | - | - | - | - | - | - | - | S | T | G   | C | A | A | P | M | V | Y | L | D | C   | S | N | S | S | A | G | T | P | G | MUC5B_H_sapiens    |                     |                    |
| 781  | L   | S | C | L | G | A | A | E | Q | K | -   | - | - | - | - | - | - | - | - | - | -   | - | - | - | - | - | - | - | - | S | S   | G | C | T | A | P | M | V | Y | L | D   | C | S | N | A | S | A | G | T | P | G                  | MUC5B_C_lupus       |                    |
| 785  | L   | T | C | L | G | A | L | M | Q | K | -   | - | - | - | - | - | - | - | - | - | -   | - | - | - | - | - | - | - | S | T | E   | C | Q | A | P | M | V | Y | L | D | C   | N | N | A | S | V | G | H | H | G | MUC5B_M_musculus   |                     |                    |
| 785  | L   | T | C | L | G | A | L | M | Q | R | -   | - | - | - | - | - | - | - | - | - | -   | - | - | - | - | - | - | - | N | K | E   | C | Q | A | P | M | V | Y | L | D | C   | N | N | A | S | V | G | D | H | G | MUC5B_R_norvegicus |                     |                    |
| 751  | L   | S | C | P | Q | R | P | Q | M | F | -   | - | - | - | - | - | - | - | - | - | -   | - | - | - | - | - | - | - | L | A | S   | C | Q | A | P | K | T | F | K | S | C   | S | Q | S | S | E | N | K | F | G | MUC6_H_sapiens     |                     |                    |
| 753  | L   | S | C | P | G | R | P | Q | M | L | -   | - | - | - | - | - | - | - | - | - | -   | - | - | - | - | - | - | - | L | A | T   | C | S | A | P | K | T | F | Q | S | C   | N | E | S | S | E | N | T | F | G | MUC6_C_lupus       |                     |                    |
| 752  | L   | S | C | P | R | Q | A | E | M | F | -   | - | - | - | - | - | - | - | - | - | -   | - | - | - | - | - | - | - | - | F | A   | S | C | P | E | P | K | T | F | Q | S   | C | S | Q | S | S | E | D | K | F | G                  | MUC6_M_musculus     |                    |
| 751  | L   | S | C | P | R | Q | A | E | M | F | -   | - | - | - | - | - | - | - | - | - | -   | - | - | - | - | - | - | - | - | F | A   | S | C | P | E | P | K | T | F | Q | S   | C | S | Q | S | S | E | D | K | F | G                  | MUC6_R_norvegicus   |                    |
| 712  | L   | S | C | T | G | K | L | Q | N | P | -   | - | - | - | - | - | - | - | - | - | -   | - | - | - | - | - | - | - | - | A | E   | S | C | K | A | P | K | K | Y | I | S   | C | S | D | S | L | E | N | K | Y | G                  | MUC6_G_gallus       |                    |
| 1291 | L   | L | C | Q | I | P | I | D | L | - | -   | - | - | - | - | - | - | - | - | - | -   | - | - | - | - | - | - | - | T | L | Q   | N | C | S | G | G | A | E | Y | V | D   | C | S | D | P | K | A | Q | R | R | T                  | MUC19_H_sapiens     |                    |
| 795  | F   | L | C | Q | T | P | I | N | L | - | -   | - | - | - | - | - | - | - | - | - | -   | - | - | - | - | - | - | - | - | A | Q   | Q | N | C | S | G | G | A | E | Y | V   | D | C | R | N | P | R | A | Q | G | R                  | V                   | MUC19_C_lupus      |
| 1030 | L   | L | C | Q | T | P | I | D | L | - | -   | - | - | - | - | - | - | - | - | - | -   | - | - | - | - | - | - | - | - | T | L   | Q | N | C | S | G | G | A | E | Y | V   | D | C | R | N | P | K | A | Q | R | R                  | V                   | MUC19_B_taurus     |
| 813  | L   | L | C | Q | T | P | I | D | L | - | -   | - | - | - | - | - | - | - | - | - | -   | - | - | - | - | - | - | - | - | T | L   | Q | N | C | T | G | G | A | E | Y | V   | D | C | R | D | P | K | A | Q | R | R                  | A                   | MUC19_S_scrofa     |
| 740  | L   | H | C | Q | T | P | L | D | L | - | -   | - | - | - | - | - | - | - | - | - | -   | - | - | - | - | - | - | - | - | T | L   | Q | N | C | S | R | G | A | E | Y | I   | D | C | K | D | P | K | A | Q | R | R                  | T                   | MUC19_M_musculus   |
| 741  | L   | H | C | Q | T | P | L | D | L | - | -   | - | - | - | - | - | - | - | - | - | -   | - | - | - | - | - | - | - | - | T | L   | Q | N | C | S | R | G | A | E | Y | I   | D | C | K | D | P | K | A | Q | R | R                  | T                   | MUC19_R_norvegicus |
| 858  | V   | Q | C | T | T | K | G | E | N | - | -   | - | - | - | - | - | - | - | - | - | -   | - | - | - | - | - | - | - | - | A | S   | E | I | C | T | G | G | A | Q | F | V   | D | C | N | F | P | N | S | R | K | R                  | T                   | FIMB1_X_laewis     |



. . . . . C . . G C . C . . . . . C . . . . . C P C . . . All Match Human VWF  
 . . C . . C . . . . . - - C . . . C . S G C . C P . G . V . . . . . C V . . E . C P C . H . Majority Match Human VWF  
 A X C C K S C Q T L D X G - - C Y S T E C V S G C V C P E G L V R D G K G G C V A X E D C P C V H N Majority

|      | 810 |   |   |   |   |   |   |   |   |   | 820 |   |   |   |   |   |   |   |   |   | 830 |   |   |   |   |   |   |   |   |   | 840 |   |   |   |   |   |   |   |   |   | 850 |   |   |   |   |   |   |   |   |   |                     |
|------|-----|---|---|---|---|---|---|---|---|---|-----|---|---|---|---|---|---|---|---|---|-----|---|---|---|---|---|---|---|---|---|-----|---|---|---|---|---|---|---|---|---|-----|---|---|---|---|---|---|---|---|---|---------------------|
| 786  | L   | E | C | T | K | T | C | Q | N | Y | D   | L | E | - | - | C | M | S | M | G | C   | V | S | G | C | L | C | P | P | G | M   | V | R | H | E | N | - | R | C | V | A   | L | E | R | C | P | C | F | H | Q | VWF_H_sapiens       |
| 778  | K   | P | R | A | L | S | C | Q | T | L | A   | A | G | - | - | Y | Y | H | T | E | C   | V | S | G | C | V | C | P | D | G | L   | M | D | D | G | R | G | G | C | V | V   | E | K | E | C | P | C | V | H | N | MUC2_H_sapiens      |
| 778  | N   | P | R | P | V | S | C | Q | T | L | A   | A | G | - | - | H | Y | Q | T | E | C   | V | S | G | C | I | C | P | S | G | L   | L | D | D | G | R | G | G | C | V | V   | E | K | D | C | P | C | V | H | N | MUC2_C_lupus        |
| 778  | K   | P | H | P | L | S | C | Q | T | L | A   | A | G | - | - | Y | Y | Q | T | E | C   | V | S | G | C | V | C | P | E | G | L   | I | D | D | G | R | G | S | C | V | V   | E | E | D | C | P | C | V | H | N | MUC2_E_caballus     |
| 776  | K   | P | R | P | T | S | C | Q | T | L | V   | A | G | - | - | Y | Y | H | T | E | C   | I | S | G | C | V | C | P | D | G | L   | L | D | D | G | R | G | G | C | V | E   | E | D | K | C | P | C | I | H | N | MUC2_M_musculus     |
| 775  | E   | P | R | P | T | S | C | Q | T | L | V   | A | R | - | - | Y | Y | H | T | E | C   | I | S | G | C | V | C | P | D | G | L   | L | D | N | G | R | G | G | C | V | V   | E | D | E | C | P | C | I | H | N | MUC2_R_norvegicus   |
| 775  | T   | P | V | Q | L | R | C | G | T | S | Q   | T | D | - | - | L | Y | Q | G | E | C   | V | S | G | C | V | C | P | E | G | L   | F | D | D | G | R | G | G | C | V | E   | E | E | D | C | P | C | I | H | N | MUC2_G_gallus       |
| 821  | A   | G | C | Q | K | S | C | H | T | L | D   | M | T | - | - | C | Y | S | P | Q | C   | V | P | G | C | V | C | P | D | G | L   | V | A | D | G | E | G | G | C | I | T   | A | E | D | C | P | C | V | H | N | MUC5AC_H_sapiens    |
| 816  | A   | G | C | Q | K | S | C | F | T | L | D   | M | D | - | - | C | Y | S | S | Q | C   | E | P | G | C | V | C | P | D | G | L   | V | S | D | G | K | G | G | C | V | A   | V | T | D | C | P | C | V | H | N | MUC5AC_C_lupus      |
| 819  | A   | G | C | Q | K | S | C | H | T | L | D   | M | D | - | - | C | Y | S | S | Q | C   | V | S | G | C | V | C | P | Q | G | L   | V | A | D | G | Q | G | G | C | I | A   | A | A | D | C | P | C | V | H | N | MUC5AC_E_caballus   |
| 820  | A   | G | C | Q | K | S | C | H | T | L | D   | M | T | - | - | C | Y | S | S | E | C   | V | P | G | C | V | C | P | N | G | L   | V | A | D | G | N | G | G | C | V | V   | T | E | D | C | P | C | V | H | N | MUC5AC_M_musculus   |
| 820  | A   | G | C | Q | K | S | C | H | T | L | D   | M | T | - | - | C | Y | S | S | E | C   | V | P | G | C | V | C | P | N | G | L   | V | A | D | G | N | G | S | C | V | V   | A | E | D | C | P | C | V | H | N | MUC5AC_R_norvegicus |
| 813  | A   | E | C | L | R | S | C | H | T | L | D   | V | G | - | - | C | F | S | T | H | C   | V | S | G | C | V | C | P | P | G | L   | V | S | D | G | S | G | G | C | I | A   | E | E | D | C | P | C | V | H | N | MUC5B_H_sapiens     |
| 813  | A   | E | C | L | R | S | C | H | T | L | D   | V | D | - | - | C | F | S | T | H | C   | V | S | G | C | V | C | P | P | G | L   | V | S | D | G | S | G | G | C | V | A   | E | E | D | C | P | C | L | H | N | MUC5B_C_lupus       |
| 817  | A   | E | C | L | K | S | C | H | T | L | D   | V | E | - | - | C | F | S | T | Q | C   | V | S | G | C | V | C | P | S | G | L   | V | A | D | G | N | G | G | C | I | A   | E | E | D | C | P | C | I | H | N | MUC5B_M_musculus    |
| 817  | A   | E | C | L | R | S | C | H | T | L | D   | V | D | - | - | C | F | S | T | Q | C   | V | S | G | C | V | C | P | S | G | L   | V | A | D | G | N | G | G | C | I | A   | E | E | D | C | P | C | V | H | N | MUC5B_R_norvegicus  |
| 783  | A   | A | C | A | P | T | C | Q | M | L | A   | T | G | V | A | C | V | P | T | K | C   | E | P | G | C | V | C | A | E | G | L   | Y | E | N | A | D | G | Q | C | V | P   | P | E | E | C | P | C | E | F | S | MUC6_H_sapiens      |
| 785  | A   | A | C | A | P | T | C | Q | M | L | A   | T | G | T | P | C | V | P | T | R | C   | E | P | G | C | V | C | A | E | G | L   | Y | E | N | A | N | G | Q | C | V | P   | P | E | E | C | P | C | E | F | A | MUC6_C_lupus        |
| 784  | A   | A | C | A | P | T | C | Q | M | L | A   | T | G | I | D | C | V | P | T | K | C   | E | S | G | C | V | C | P | K | G | L   | Y | E | N | S | D | G | Q | C | V | P   | A | E | E | C | P | C | D | Y | A | MUC6_M_musculus     |
| 783  | A   | A | C | A | P | T | C | Q | M | L | A   | T | G | T | A | C | V | P | T | K | C   | E | S | G | C | V | C | P | K | G | L   | Y | E | N | S | D | G | Q | C | V | P   | A | E | E | C | P | C | D | Y | A | MUC6_R_norvegicus   |
| 744  | A   | T | C | A | P | T | C | Q | M | L | A   | T | G | I | E | C | I | P | T | K | C   | E | S | G | C | V | C | A | D | G | L   | Y | E | N | L | D | G | R | C | V | P   | P | E | E | C | P | C | E | Y | G | MUC6_G_gallus       |
| 1323 | N   | R | T | C | S | T | R | N | I | P | V   | F | D | - | - | - | E | N | L | P | C   | K | R | G | C | F | C | P | E | G | M   | V | R | N | S | K | G | I | C | V | F   | P | N | D | C | P | C | S | F | G | MUC19_H_sapiens     |
| 827  | D   | G | K | C | G | T | W | S | M | P | G   | F | D | - | - | - | E | N | L | P | C   | K | A | G | C | Y | C | P | V | G | M   | V | R | N | S | K | G | N | C | V | F   | P | E | D | C | P | C | S | F | G | MUC19_C_lupus       |
| 1062 | D   | S | T | C | S | T | R | N | I | P | S   | F | D | - | - | - | E | N | L | P | C   | K | R | G | C | Y | C | P | E | G | M   | V | R | N | S | K | G | S | C | V | F   | P | D | D | C | P | C | S | F | G | MUC19_B_taurus      |
| 845  | D   | S | T | C | S | T | W | N | I | P | S   | F | E | - | - | - | E | N | L | P | C   | K | R | G | C | Y | C | P | V | G | M   | V | R | N | S | K | G | N | C | V | F   | P | E | D | C | P | C | S | F | G | MUC19_S_scrofa      |
| 772  | E   | R | T | C | A | T | R | N | I | P | D   | F | E | - | - | - | G | D | L | P | C   | K | R | G | C | Y | C | P | V | G | M   | V | R | N | S | K | G | I | C | I | H   | P | D | D | C | P | C | S | F | G | MUC19_M_musculus    |
| 773  | E   | R | T | C | A | T | R | N | I | P | D   | F | E | - | - | - | G | D | L | P | C   | K | R | G | C | Y | C | P | V | G | M   | V | R | N | S | K | G | I | C | I | H   | P | D | D | C | P | C | S | F | G | MUC19_R_norvegicus  |
| 890  | E   | L | G | C | N | S | R | H | L | K | L   | P | Q | - | - | - | G | E | G | E | C   | K | P | G | C | Y | C | P | E | P | L   | V | R | D | S | K | G | E | C | I | D   | P | S | D | C | P | C | Q | Y | G | FIMB1_X_laewis      |

. . . . . G . . . . . C . . . . . C . . . . . W . C . . . . . C . . . . . G . . . . . F D G All Match Human VWF  
 . . . . . Y . . . . . C N - T C . . . . . W . C T . . . . . C . . . . . G . . . . . H . . . . . T F D G Majority Match Human VWF  
 G A S Y X P G E T I R V D C N - T C T C X K G R W E C T Q N P - C X S T C X I Y G E G H Y I T F D G Majority

|      | 860 |   |   |   |   |   |   |   |   |   | 870 |   |   |   |   |   |   |   |   |   | 880 |   |   |   |   |   |   |   |   |   | 890 |   |   |   |   |   |   |   |   |   | 900 |   |   |   |   |   |   |   |   |                    |                     |                   |
|------|-----|---|---|---|---|---|---|---|---|---|-----|---|---|---|---|---|---|---|---|---|-----|---|---|---|---|---|---|---|---|---|-----|---|---|---|---|---|---|---|---|---|-----|---|---|---|---|---|---|---|---|--------------------|---------------------|-------------------|
| 833  | G   | K | E | Y | A | P | G | E | T | V | K   | I | G | C | N | - | T | C | V | C | R   | D | R | K | W | N | C | T | D | H | V   | - | C | D | A | T | C | S | T | I | G   | M | A | H | Y | L | T | F | D | G                  | VWF_H_sapiens       |                   |
| 826  | N   | D | L | Y | S | S | G | A | K | I | K   | V | D | C | N | - | T | C | T | C | K   | R | G | R | W | V | C | T | Q | A | V   | - | C | H | G | T | C | S | I | Y | G   | S | G | H | Y | I | T | F | D | G                  | MUC2_H_sapiens      |                   |
| 826  | H   | D | L | Y | S | P | G | D | K | I | K   | V | D | C | N | - | T | C | T | C | Q   | R | G | R | W | T | C | T | Q | S | V   | - | C | Y | G | S | C | S | I | Y | G   | S | G | H | Y | I | T | F | D | G                  | MUC2_C_lupus        |                   |
| 826  | K   | G | F | F | S | R | G | D | K | I | K   | V | D | C | N | - | T | C | T | C | Q   | R | G | R | W | A | C | T | Q | S | V   | - | C | H | G | T | C | S | I | Y | G   | S | G | H | Y | I | T | F | D | G                  | MUC2_E_caballus     |                   |
| 824  | K   | D | L | Y | S | S | G | E | S | I | K   | L | D | C | N | N | T | C | T | C | Q   | K | G | R | W | E | C | T | R | Y | A   | - | C | H | S | T | C | S | I | Y | G   | S | G | H | Y | I | T | F | D | G                  | MUC2_M_musculus     |                   |
| 823  | K   | Q | F | Y | D | S | G | K | S | I | K   | L | D | C | N | N | T | C | T | C | Q   | K | G | R | W | E | C | T | R | Y | A   | - | C | H | S | T | C | S | I | Y | G   | S | G | H | Y | I | T | F | D | G                  | MUC2_R_norvegicus   |                   |
| 823  | S   | D | W | Y | N | H | G | Q | S | I | T   | V | D | C | N | - | T | C | T | C | Q   | K | G | I | W | S | C | T | K | N | V   | - | C | Y | G | T | C | M | I | Y | G   | S | G | H | Y | I | T | F | D | G                  | MUC2_G_gallus       |                   |
| 869  | E   | A | S | Y | R | A | G | Q | T | I | R   | V | G | C | N | - | T | C | T | C | D   | S | R | M | W | R | C | T | D | D | P   | - | C | L | A | T | C | A | V | Y | G   | D | G | H | Y | L | T | F | D | G                  | MUC5AC_H_sapiens    |                   |
| 864  | E   | A | S | Y | L | P | G | Q | T | I | W   | V | G | C | N | - | T | C | T | C | K   | N | R | M | W | K | C | T | D | E | P   | - | C | L | A | T | C | A | V | Y | G   | D | G | H | Y | L | T | F | D | G                  | MUC5AC_C_lupus      |                   |
| 867  | E   | A | S | Y | Q | A | G | Q | T | I | R   | V | G | C | N | - | T | C | T | C | K   | S | R | V | W | Q | C | T | D | E | P   | - | C | L | A | T | C | A | V | Y | G   | D | G | H | Y | L | T | F | D | G                  | MUC5AC_E_caballus   |                   |
| 868  | E   | A | T | Y | R | P | G | E | T | I | Q   | V | G | C | N | - | N | C | T | C | E   | N | R | M | W | Q | C | T | D | K | P   | - | C | L | A | T | C | A | V | Y | G   | D | G | H | Y | I | T | F | D | G                  | MUC5AC_M_musculus   |                   |
| 868  | E   | A | T | Y | R | P | G | E | T | I | Q   | V | G | C | N | - | N | C | T | C | E   | N | R | M | W | Q | C | T | D | K | P   | - | C | L | A | T | C | A | V | Y | G   | D | G | H | Y | I | T | F | D | G                  | MUC5AC_R_norvegicus |                   |
| 861  | E   | A | T | Y | K | P | G | E | T | I | R   | V | D | C | N | - | T | C | T | C | R   | N | R | R | W | E | C | S | H | R | L   | - | C | L | G | T | C | V | A | Y | G   | D | G | H | F | I | T | F | D | G                  | MUC5B_H_sapiens     |                   |
| 861  | E   | A | A | Y | K | P | G | E | T | I | R   | V | A | C | N | - | T | C | T | C | K   | N | R | R | W | E | C | S | H | K | P   | - | C | L | G | T | C | V | A | Y | G   | D | G | H | F | I | T | F | D | G                  | MUC5B_C_lupus       |                   |
| 865  | E   | V | T | Y | R | P | G | E | I | I | R   | V | D | C | N | - | N | C | T | C | K   | N | R | R | W | E | C | T | N | K | P   | - | C | M | G | A | C | V | A | Y | G   | D | G | H | F | V | T | F | D | G                  | MUC5B_M_musculus    |                   |
| 865  | E   | A | T | Y | R | P | G | E | I | I | R   | V | D | C | N | - | N | C | T | C | R   | N | R | W | E | C | T | N | Q | P | -   | C | M | G | A | C | V | A | Y | G | D   | G | H | F | V | T | F | D | G | MUC5B_R_norvegicus |                     |                   |
| 833  | G   | V | S | Y | P | G | G | A | E | L | H   | T | D | C | R | - | T | C | S | C | S   | R | G | R | W | A | C | Q | Q | G | T   | H | - | C | P | S | T | C | T | L | Y   | G | E | G | H | V | I | T | F | D                  | G                   | MUC6_H_sapiens    |
| 835  | G   | A | S | Y | P | P | G | A | E | L | H   | T | D | C | R | - | T | C | T | C | S   | R | G | K | W | T | C | W | Q | S | A   | R | - | C | S | S | T | C | A | L | Y   | G | E | G | H | V | V | T | F | D                  | G                   | MUC6_C_lupus      |
| 834  | G   | V | S | Y | P | G | G | F | E | L | H   | T | D | C | K | - | T | C | T | C | S   | Q | G | R | W | T | C | Q | L | S | T   | Q | - | C | P | S | T | C | V | L | Y   | G | E | G | H | I | I | T | F | D                  | G                   | MUC6_M_musculus   |
| 833  | G   | T | S | Y | P | G | G | S | E | L | H   | T | D | C | K | - | T | C | T | C | S   | Q | G | R | W | T | C | Q | L | S | T   | Q | - | C | P | S | T | C | V | L | Y   | G | E | G | H | I | I | T | F | D                  | G                   | MUC6_R_norvegicus |
| 794  | G   | L | S | Y | G | K | G | E | Q | I | Q   | T | E | C | E | - | I | C | T | C | R   | K | G | K | W | K | C | V | Q | K | S   | R | - | C | S | S | T | C | N | L | Y   | G | E | G | H | I | T | F | D | G                  | MUC6_G_gallus       |                   |
| 1370 | G   | R | E | Y | D | E | G | S | V | T | S   | V | G | C | N | - | E | C | T | C | I   | K | G | S | W | S | C | T | Q | N | E   | - | C | Q | T | I | C | H | I | Y | G   | E | G | H | V | R | T | F | D | G                  | MUC19_H_sapiens     |                   |
| 874  | G   | S | E | Y | D | Q | G | S | V | T | L   | V | G | C | N | - | K | C | T | C | I   | K | G | S | W | S | C | T | Q | N | E   | - | C | Q | T | V | C | H | I | Y | G   | E | G | H | V | R | S | F | D | G                  | MUC19_C_lupus       |                   |
| 1109 | G   | R | E | Y | D | Q | G | S | V | T | S   | V | G | C | N | - | K | C | T | C | I   | K | G | S | W | N | C | T | Q | N | E   | - | C | Q | T | T | C | H | I | Y | G   | E | G | H | V | R | T | F | D | G                  | MUC19_B_taurus      |                   |
| 892  | G   | R | E | Y | D | Q | G | S | V | T | S   | V | G | C | N | - | K | C | T | C | I   | K | G | S | W | N | C | T | Q | N | E   | - | C | Q | T | T | C | H | I | Y | G   | E | G | H | I | R | T | F | D | G                  | MUC19_S_scrofa      |                   |
| 819  | D   | R | E | Y | E | Q | G | S | V | T | S   | V | G | C | N | - | E | C | T | C | I   | K | G | S | W | N | C | T | Q | N | E   | - | C | Q | S | T | C | H | V | Y | G   | E | G | H | F | R | T | F | D | G                  | MUC19_M_musculus    |                   |
| 820  | D   | R | E | Y | E | Q | G | S | V | T | S   | V | G | C | N | - | E | C | T | C | I   | K | G | S | W | N | C | T | Q | N | E   | - | C | Q | S | T | C | H | V | Y | G   | E | G | H | Y | R | T | F | D | G                  | MUC19_R_norvegicus  |                   |
| 937  | G   | N | D | Y | E | N | G | K | I | V | R   | H | S | C | D | - | K | C | V | C | K   | K | G | T | W | D | C | T | Q | N | K   | - | C | Q | T | Q | C | H | I | Y | G   | D | G | Q | L | H | T | F | D | G                  | FIMB1_X_laewis      |                   |

. . . . F . G . C . Y . . . . . C . . . . . F . . . . . C . . . . . C . . . . . All Match Human VWF  
 . . Y . F . G . C . Y . L . Q D Y C G . N - . . . G T F R I . . . N . . . V . C . K . . . I Majority Match Human VWF  
 K R Y S F D G X C E Y T L V Q D Y C G X N - X S N G T F R I L T E N V P C G T T G V T C S K A I K I Majority

|      | 910 |   |   |   |   |   |   |   |   |   | 920 |   |   |   |   |   |   |   |   |   | 930 |   |   |   |   |   |   |   |   |   | 940 |   |   |   |   |   |   |   |   |   | 950 |   |   |   |   |   |   |   |   |                     |                    |
|------|-----|---|---|---|---|---|---|---|---|---|-----|---|---|---|---|---|---|---|---|---|-----|---|---|---|---|---|---|---|---|---|-----|---|---|---|---|---|---|---|---|---|-----|---|---|---|---|---|---|---|---|---------------------|--------------------|
| 881  | L   | K | Y | L | F | P | G | E | C | Q | Y   | V | L | V | Q | D | Y | C | G | S | N   | - | - | P | - | G | T | F | R | I | L   | V | G | N | K | G | C | S | H | P | S   | V | K | C | K | K | R | V | T | I                   | VWF_H_sapiens      |
| 874  | K   | Y | Y | D | F | D | G | H | C | S | Y   | V | A | V | Q | D | Y | C | G | Q | N   | - | S | S | L | G | S | F | S | I | I   | T | E | N | V | P | C | G | T | G | V   | T | C | S | K | A | I | K | I | MUC2_H_sapiens      |                    |
| 874  | K   | Y | Y | D | F | D | G | H | C | S | Y   | V | A | A | Q | D | Y | C | G | H | N   | - | A | S | L | G | S | F | S | I | I   | T | E | N | V | P | C | G | T | G | V   | T | C | S | K | A | I | K | I | MUC2_C_lupus        |                    |
| 874  | K   | Y | Y | N | F | D | G | Q | C | S | Y   | V | A | V | Q | D | Y | C | G | Q | N   | - | S | S | L | G | S | F | S | I | I   | T | E | N | V | P | C | G | T | G | V   | T | C | S | K | A | I | K | I | MUC2_E_caballus     |                    |
| 873  | K   | H | Y | D | F | D | G | H | C | S | Y   | V | A | V | Q | D | Y | C | G | Q | N   | - | - | S | T | G | S | F | S | I | I   | T | E | N | V | P | C | G | T | G | V   | T | C | S | K | A | I | K | I | MUC2_M_musculus     |                    |
| 872  | K   | H | Y | D | F | D | G | H | C | S | Y   | V | A | V | Q | D | Y | C | G | Q | N   | - | - | S | T | G | S | F | S | I | I   | T | E | N | V | P | C | G | T | G | V   | T | C | S | K | A | I | K | I | MUC2_R_norvegicus   |                    |
| 871  | K   | F | Y | D | F | D | G | S | C | E | Y   | V | A | T | Q | D | Y | C | G | D | K   | - | N | S | G | G | S | F | S | I | I   | T | E | N | V | P | C | G | T | G | V   | T | C | S | K | A | I | K | M | MUC2_G_gallus       |                    |
| 917  | Q   | S | Y | S | F | N | G | D | C | E | Y   | T | L | V | Q | N | H | C | G | G | K   | D | S | T | Q | D | S | F | R | V | V   | T | E | N | V | P | C | G | T | G | T   | T | C | S | K | A | I | K | I | MUC5AC_H_sapiens    |                    |
| 912  | R   | R | Y | S | F | S | G | D | C | A | Y   | T | L | V | Q | D | H | C | G | G | N   | S | T | A | N | A | T | F | R | V | V   | T | E | N | V | P | C | G | T | G | V   | T | C | S | K | A | I | K | L | MUC5AC_C_lupus      |                    |
| 915  | Q   | R | Y | S | F | S | G | D | C | E | Y   | T | L | V | Q | D | H | C | G | Q | N   | S | S | A | Q | E | A | F | R | V | V   | T | E | N | V | P | C | G | T | G | T   | T | C | S | K | A | I | K | I | MUC5AC_E_caballus   |                    |
| 916  | Q   | R | Y | S | F | N | G | D | C | E | Y   | T | L | L | Q | D | N | C | G | G | N   | G | S | S | Q | D | A | F | R | V | I   | T | E | N | I | P | C | G | T | G | T   | T | C | S | K | S | I | K | I | MUC5AC_M_musculus   |                    |
| 916  | Q   | R | Y | S | F | S | G | D | C | E | Y   | T | L | L | Q | D | N | C | G | G | N   | G | S | S | Q | D | A | F | R | V | V   | T | E | N | I | P | C | G | T | G | T   | T | C | S | K | G | I | K | I | MUC5AC_R_norvegicus |                    |
| 909  | D   | R | Y | S | F | E | G | S | C | E | Y   | I | L | A | Q | D | Y | C | G | D | N   | - | T | T | H | G | T | F | R | I | V   | T | E | N | I | P | C | G | T | G | T   | T | C | S | K | A | I | K | L | MUC5B_H_sapiens     |                    |
| 909  | E   | R | Y | S | F | E | G | S | C | E | Y   | T | L | A | Q | D | H | C | G | G | N   | G | T | A | N | G | T | F | R | V | V   | T | E | N | V | P | C | G | T | G | V   | T | C | S | K | A | I | K | L | MUC5B_C_lupus       |                    |
| 913  | E   | R | Y | I | F | E | G | S | C | E | Y   | T | L | A | Q | D | Y | C | R | G | N   | T | S | T | N | G | T | F | R | I | V   | T | E | N | V | P | C | G | T | G | T   | T | C | S | K | T | I | K | I | MUC5B_M_musculus    |                    |
| 913  | E   | R | Y | I | F | E | G | N | C | E | Y   | T | L | A | Q | D | Y | C | R | G | N   | T | S | T | D | G | T | F | R | I | V   | T | E | N | V | P | C | G | T | G | T   | T | C | S | K | A | I | K | I | MUC5B_R_norvegicus  |                    |
| 882  | Q   | R | F | V | F | D | G | N | C | E | Y   | I | L | A | T | D | V | C | G | V | N   | - | D | S | Q | P | T | F | K | I | L   | T | E | N | V | I | C | G | N | S | G   | V | T | C | S | R | A | I | K | I                   | MUC6_H_sapiens     |
| 884  | Q   | R | F | M | F | D | G | S | C | G | Y   | I | L | T | T | D | G | C | G | A | N   | - | N | S | R | P | T | F | T | V | L   | T | E | N | V | V | C | G | K | S | G   | V | T | C | S | R | S | I | K | I                   | MUC6_C_lupus       |
| 883  | Q   | R | F | V | F | D | G | D | C | E | Y   | M | L | A | T | D | D | C | G | A | N   | - | S | S | Q | P | T | F | K | V | L   | T | E | N | V | I | C | G | K | S | G   | V | T | C | S | R | A | I | K | I                   | MUC6_M_musculus    |
| 882  | Q   | R | F | V | F | D | G | N | C | E | Y   | T | L | A | T | D | D | C | G | A | N   | - | S | S | Q | P | T | F | K | V | L   | T | E | N | V | I | C | G | K | S | G   | V | T | C | S | R | A | I | K | I                   | MUC6_R_norvegicus  |
| 843  | Q   | R | F | V | F | D | G | N | C | E | Y   | I | L | A | M | D | G | C | N | V | N   | - | R | P | L | S | S | F | K | I | V   | T | E | N | V | I | C | G | K | S | G   | V | T | C | S | R | S | I | S | I                   | MUC6_G_gallus      |
| 1418 | K   | S | Y | S | F | D | G | L | C | Q | Y   | S | F | L | E | D | Y | C | G | H | E   | - | - | - | N | G | T | F | R | I | L   | T | E | S | V | P | C | C | E | D | G   | L | T | C | S | R | K | I | I | V                   | MUC19_H_sapiens    |
| 922  | K   | S | Y | S | F | D | G | L | C | Q | Y   | S | F | V | E | D | Y | C | G | R | E   | - | - | - | N | G | T | F | R | I | L   | T | E | S | I | P | C | C | E | D | G   | L | T | C | S | R | K | I | I | V                   | MUC19_C_lupus      |
| 1157 | K   | S | Y | S | F | D | G | L | C | Q | Y   | S | F | I | E | D | Y | C | G | R | E   | - | - | - | N | G | T | F | R | I | L   | T | E | S | V | P | C | C | E | D | G   | L | T | C | S | R | K | I | I | V                   | MUC19_B_taurus     |
| 940  | K   | T | Y | S | F | D | G | L | C | Q | Y   | S | F | L | E | D | Y | C | G | S | E   | - | - | - | N | G | T | F | R | I | L   | T | E | S | V | P | C | C | E | D | G   | L | T | C | S | R | K | I | I | V                   | MUC19_S_scrofa     |
| 867  | E   | S | Y | S | F | D | G | L | C | Q | Y   | T | F | L | E | D | Y | C | G | Q | E   | - | - | - | N | G | T | F | R | I | L   | I | E | S | V | P | C | C | E | N | G   | L | T | C | S | R | K | V | I | V                   | MUC19_M_musculus   |
| 868  | E   | S | Y | S | F | D | G | L | C | Q | Y   | T | F | L | E | D | Y | C | G | Q | E   | - | - | - | N | G | T | F | R | I | L   | T | E | S | V | P | C | C | E | N | G   | L | T | C | S | R | K | I | I | V                   | MUC19_R_norvegicus |
| 985  | L   | W | Y | N | F | D | G | V | C | Q | Y   | V | L | V | T | D | Y | C | S | E | G   | - | - | - | N | G | T | F | R | I | S   | A | Q | S | V | A | C | C | Q | D | G   | L | T | C | A | R | K | V | V | I                   | FIMB1_X_laewis     |

|      | 960                                                                                               |   |   |   |   |   |   |   |   |   | 970                                                                                       |   |   |   |   |   |   |   |   |   | 980 |   |   |   |   |   |   |   |   |   | 990 |   |   |   |   |   |   |   |   |   | 1000 |   |   |   |   |   |   |   |   |                 |                     |                    |                |  |  |  |  |  |  |  |                          |
|------|---------------------------------------------------------------------------------------------------|---|---|---|---|---|---|---|---|---|-------------------------------------------------------------------------------------------|---|---|---|---|---|---|---|---|---|-----|---|---|---|---|---|---|---|---|---|-----|---|---|---|---|---|---|---|---|---|------|---|---|---|---|---|---|---|---|-----------------|---------------------|--------------------|----------------|--|--|--|--|--|--|--|--------------------------|
|      | . . . . . E . . L . D G . . . V . . . . . - - - - - . . . . . G . Y . . . . . - -                 |   |   |   |   |   |   |   |   |   | . . . . . H D G K V T V V Q R G E G X E V - - - - - P Y S V R T V G L Y L V V E X S I - - |   |   |   |   |   |   |   |   |   |     |   |   |   |   |   |   |   |   |   |     |   |   |   |   |   |   |   |   |   |      |   |   |   |   |   |   |   |   |                 | All Match Human VWF |                    |                |  |  |  |  |  |  |  |                          |
|      | F L G G Y E L K L H D G K V T V V Q R G E G X E V - - - - - P Y S V R T V G L Y L V V E X S I - - |   |   |   |   |   |   |   |   |   |                                                                                           |   |   |   |   |   |   |   |   |   |     |   |   |   |   |   |   |   |   |   |     |   |   |   |   |   |   |   |   |   |      |   |   |   |   |   |   |   |   |                 |                     |                    |                |  |  |  |  |  |  |  | Majority Match Human VWF |
|      | F L G G Y E L K L H D G K V T V V Q R G E G X E V - - - - - P Y S V R T V G L Y L V V E X S I - - |   |   |   |   |   |   |   |   |   |                                                                                           |   |   |   |   |   |   |   |   |   |     |   |   |   |   |   |   |   |   |   |     |   |   |   |   |   |   |   |   |   |      |   |   |   |   |   |   |   |   |                 |                     |                    |                |  |  |  |  |  |  |  | Majority                 |
| 928  | L                                                                                                 | V | E | G | G | E | I | E | L | F | D                                                                                         | G | E | V | N | V | K | R | P | M | K   | - | D | E | T | - | - | - | - | - | H   | F | E | V | V | E | S | G | R | Y | I    | I | L | L | L | G | - | - | - | VWF_H_sapiens   |                     |                    |                |  |  |  |  |  |  |  |                          |
| 923  | F                                                                                                 | M | G | R | T | E | L | K | L | E | D                                                                                         | K | H | R | V | V | I | Q | R | D | E   | G | H | H | V | - | - | - | - | - | A   | Y | T | T | R | E | V | G | Q | Y | L    | V | V | E | S | S | T | - | - | -               | MUC2_H_sapiens      |                    |                |  |  |  |  |  |  |  |                          |
| 923  | F                                                                                                 | I | G | R | T | E | L | K | L | E | N                                                                                         | K | Q | R | L | V | V | Q | R | D | T   | G | H | A | V | - | - | - | - | - | S   | Y | T | T | R | D | V | G | Q | Y | L    | V | V | E | A | S | I | - | - | -               | MUC2_C_lupus        |                    |                |  |  |  |  |  |  |  |                          |
| 923  | F                                                                                                 | I | G | R | T | E | L | K | L | E | D                                                                                         | K | H | R | V | V | I | Q | R | D | V   | G | H | H | V | - | - | - | - | - | A   | Y | T | T | R | E | V | G | Q | Y | L    | V | V | E | A | S | V | - | - | -               | MUC2_E_caballus     |                    |                |  |  |  |  |  |  |  |                          |
| 921  | F                                                                                                 | I | G | G | T | E | L | K | L | V | D                                                                                         | K | H | R | V | V | K | Q | L | E | E   | G | H | H | V | - | - | - | - | - | P   | Y | I | T | R | E | V | G | Q | Y | L    | V | V | E | A | S | S | - | - | -               | MUC2_M_musculus     |                    |                |  |  |  |  |  |  |  |                          |
| 920  | F                                                                                                 | I | G | G | T | E | L | K | L | V | D                                                                                         | K | H | R | V | V | K | Q | L | E | E   | G | H | H | V | - | - | - | - | - | P   | F | I | T | R | E | V | G | L | Y | L    | V | V | E | V | S | S | - | - | -               | MUC2_R_norvegicus   |                    |                |  |  |  |  |  |  |  |                          |
| 920  | F                                                                                                 | I | G | K | T | E | L | K | L | E | N                                                                                         | K | D | Y | K | E | I | Q | R | D | V   | G | D | D | V | - | - | - | - | - | H   | Y | Q | N | K | T | V | G | L | Y | L    | V | I | E | A | S | N | - | - | -               | MUC2_G_gallus       |                    |                |  |  |  |  |  |  |  |                          |
| 967  | F                                                                                                 | L | G | G | F | E | L | K | L | S | H                                                                                         | G | K | V | E | V | I | G | T | D | E   | S | Q | E | V | - | - | - | - | - | P   | Y | T | I | R | Q | M | G | I | Y | L    | V | V | D | T | D | I | - | - | -               | MUC5AC_H_sapiens    |                    |                |  |  |  |  |  |  |  |                          |
| 962  | F                                                                                                 | L | G | S | Y | E | L | R | L | S | G                                                                                         | G | S | V | E | V | I | E | K | G | A   | G | Q | A | A | - | - | - | - | - | P   | Y | S | I | R | Q | M | G | I | Y | L    | V | V | D | T | E | V | - | - | -               | MUC5AC_C_lupus      |                    |                |  |  |  |  |  |  |  |                          |
| 965  | F                                                                                                 | L | G | S | Y | E | L | K | L | S | D                                                                                         | G | K | V | E | V | I | E | K | G | A   | G | R | E | V | - | - | - | - | - | P   | Y | S | I | R | H | M | G | I | Y | L    | V | V | D | T | E | V | - | - | -               | MUC5AC_E_caballus   |                    |                |  |  |  |  |  |  |  |                          |
| 966  | F                                                                                                 | L | G | N | Y | E | L | K | L | S | D                                                                                         | S | K | M | E | V | V | Q | K | D | V   | G | Q | E | P | - | - | - | - | - | P   | Y | F | V | H | Q | M | G | N | Y | L    | V | V | E | T | D | I | - | - | -               | MUC5AC_M_musculus   |                    |                |  |  |  |  |  |  |  |                          |
| 966  | F                                                                                                 | L | G | S | Y | E | L | K | L | S | D                                                                                         | S | K | M | E | V | V | Q | K | G | V   | G | Q | E | P | - | - | - | - | - | P   | Y | F | V | H | Q | M | G | N | Y | L    | V | V | E | T | D | I | - | - | -               | MUC5AC_R_norvegicus |                    |                |  |  |  |  |  |  |  |                          |
| 958  | F                                                                                                 | V | E | S | Y | E | L | I | L | Q | E                                                                                         | G | T | F | K | A | V | A | R | G | P   | G | G | D | P | - | - | - | - | - | P   | Y | K | I | R | Y | M | G | I | F | L    | V | I | E | T | H | - | - | - | MUC5B_H_sapiens |                     |                    |                |  |  |  |  |  |  |  |                          |
| 959  | F                                                                                                 | L | E | N | Y | E | L | I | L | H | E                                                                                         | G | T | Y | K | V | V | Q | R | G | P   | G | R | G | L | - | - | - | - | - | P   | Y | K | V | R | Y | T | G | I | Y | L    | T | V | E | T | Q | S | - | - | -               | MUC5B_C_lupus       |                    |                |  |  |  |  |  |  |  |                          |
| 963  | F                                                                                                 | V | E | S | Y | E | L | I | L | H | E                                                                                         | G | N | F | K | V | V | E | Q | G | P   | S | G | D | P | - | - | - | - | - | P   | Y | K | I | R | F | M | G | I | F | L    | V | I | E | I | R | S | - | - | -               | MUC5B_M_musculus    |                    |                |  |  |  |  |  |  |  |                          |
| 963  | F                                                                                                 | V | E | S | Y | E | L | I | L | H | E                                                                                         | G | N | F | K | V | V | A | R | G | P   | S | G | D | P | - | - | - | - | - | P   | Y | K | I | R | Y | M | G | I | F | L    | V | I | E | I | R | S | - | - | -               | MUC5B_R_norvegicus  |                    |                |  |  |  |  |  |  |  |                          |
| 931  | F                                                                                                 | L | G | G | L | S | V | V | L | A | D                                                                                         | R | N | Y | T | V | T | G | E | E | P   | - | H | V | - | - | - | - | - | Q | L   | G | V | T | P | G | A | L | S | L | V    | V | D | I | S | I | P | G | - | -               | -                   | MUC6_H_sapiens     |                |  |  |  |  |  |  |  |                          |
| 933  | S                                                                                                 | L | G | G | L | S | I | V | L | A | D                                                                                         | R | N | Y | T | V | S | G | E | D | P   | - | H | V | - | - | - | - | - | H | F   | R | V | N | A | G | S | L | N | L | V    | L | D | I | T | I | S | N | - | -               | -                   | MUC6_C_lupus       |                |  |  |  |  |  |  |  |                          |
| 932  | S                                                                                                 | L | G | G | L | F | I | T | M | A | D                                                                                         | S | N | Y | T | V | S | G | E | E | P   | - | L | V | - | - | - | - | - | H | L   | K | V | K | P | S | P | L | N | L | V    | L | D | I | D | I | P | G | - | -               | -                   | MUC6_M_musculus    |                |  |  |  |  |  |  |  |                          |
| 931  | S                                                                                                 | L | G | G | L | S | I | T | M | A | D                                                                                         | G | N | Y | T | V | S | G | E | E | P   | - | L | V | - | - | - | - | - | H | L   | Q | V | K | P | S | P | L | N | L | V    | L | D | I | D | I | P | G | - | -               | -                   | MUC6_R_norvegicus  |                |  |  |  |  |  |  |  |                          |
| 892  | Y                                                                                                 | L | G | N | L | T | I | I | L | R | D                                                                                         | E | T | Y | S | I | S | G | K | N | L   | - | Q | V | - | - | - | - | - | K | Y   | N | V | K | K | N | A | L | H | L | M    | F | D | I | I | I | P | G | - | -               | -                   | MUC6_G_gallus      |                |  |  |  |  |  |  |  |                          |
| 1465 | A                                                                                                 | F | Q | D | Q | N | I | V | L | Q | D                                                                                         | G | K | V | T | A | V | K | S | T | E   | S | K | K | C | - | E | L | N | A | N   | A | Y | S | I | H | T | V | G | L | Y    | L | I | L | K | F | Q | N | - | -               | -                   | MUC19_H_sapiens    |                |  |  |  |  |  |  |  |                          |
| 969  | S                                                                                                 | F | Q | D | Q | N | V | V | L | H | D                                                                                         | G | K | V | T | A | S | K | I | T | E   | S | K | E | C | - | G | F | N | G | N   | T | Y | S | V | H | T | V | G | L | Y    | L | I | L | K | F | S | N | - | -               | -                   | MUC19_C_lupus      |                |  |  |  |  |  |  |  |                          |
| 1204 | A                                                                                                 | F | Q | D | Q | N | I | V | L | H | D                                                                                         | G | K | V | T | A | V | K | T | T | E   | S | K | E | C | - | E | L | N | G | N   | S | Y | S | V | H | T | V | G | L | Y    | L | I | L | K | F | L | N | - | -               | -                   | MUC19_B_taurus     |                |  |  |  |  |  |  |  |                          |
| 987  | A                                                                                                 | F | Q | D | Q | N | V | V | L | H | D                                                                                         | G | K | V | T | A | V | K | T | T | E   | S | K | E | C | - | E | L | E | E | N   | S | Y | S | V | H | T | V | G | L | Y    | L | I | L | K | F | L | S | - | -               | -                   | MUC19_S_scrofa     |                |  |  |  |  |  |  |  |                          |
| 914  | T                                                                                                 | F | Q | D | Q | N | I | I | L | Q | D                                                                                         | G | K | V | T | A | V | Q | T | A | E   | S | T | D | C | R | E | R | S | A | N   | L | Y | S | I | H | T | V | G | L | Y    | L | I | V | K | L | L | N | - | -               | -                   | MUC19_M_musculus   |                |  |  |  |  |  |  |  |                          |
| 915  | A                                                                                                 | F | Q | D | Q | N | I | I | L | Q | D                                                                                         | G | K | V | T | A | V | Q | T | A | E   | S | E | D | C | - | E | R | S | A | S   | S | Y | S | I | H | T | V | G | L | Y    | L | I | V | K | L | L | N | - | -               | -                   | MUC19_R_norvegicus |                |  |  |  |  |  |  |  |                          |
| 1032 | S                                                                                                 | F | Q | N | T | N | I | I | L | Q | D                                                                                         | G | Q | V | K | I | E | H | S | G | D   | C | S | V | S | - | - | - | H | S | H   | D | V | Y | S | V | R | K | E | G | L    | F | H | L | I | M | F | K | F | -               | -                   | -                  | FIMB1_X_laewis |  |  |  |  |  |  |  |                          |

. . . . . W . . . . . C G L C G . . . . . D . . . . . All Match Human VWF  
 - . . . . . W D . . . . I . . . . L . . . . V C G L C G N F D . . . . N D . T . . . . V . . Majority Match Human VWF  
 - - G I T L I W D K K T S I F I K L D P E Y K G K V C G L C G N F D G N A K N D F T T R S Q S V V S Majority

|      | 1010                                | 1020                              | 1030        | 1040                | 1050 |                     |
|------|-------------------------------------|-----------------------------------|-------------|---------------------|------|---------------------|
| 968  | - K A L S V V W D R H L S I S V V L | L K Q T Y Q E K V C G L C G N F D | G I Q N N D | L T S S N L Q V E E |      | VWF_H_sapiens       |
| 965  | - - G I I V I W D K R T T V F I K L | A P S Y K G T V C G L C G N F D   | H R S N N D | F T T R D H M V V S |      | MUC2_H_sapiens      |
| 965  | - - G V I I W D R K T T I F I K L   | S P S Y K G T V C G L C G N F D   | Q R S S N D | F T T R D H M V V D |      | MUC2_C_lupus        |
| 965  | - - G I I V I W D K R T T I F I K L | A P S Y K G T V C G L C G T F D   | Q R S N N D | F T T R D H M V V E |      | MUC2_E_caballus     |
| 963  | - - G I I V I W D K K T T I F I K L | D P S Y K G T V C G L C G N F D   | D Q T K N D | F T T R D H M V V T |      | MUC2_M_musculus     |
| 962  | - - G I I V I W D K K T T I F I K L | D P S Y K G N V C G L C G N F D   | D Q T K N D | F T T R D H M V V A |      | MUC2_R_norvegicus   |
| 962  | - - G V M L I W D K K T T V F I K L | T P D Y K G K V C G L C G N F D   | D K A N N D | F T S R N G L Q E T |      | MUC2_G_gallus       |
| 1009 | - - G L V L L W D K K T S I F I N L | S P E F K G R V C G L C G N F D   | D I A V N D | F A T R S R S V V G |      | MUC5AC_H_sapiens    |
| 1004 | - - G L V L L W D R K T S I F L K L | S P E F K G R V C G L C G N F D   | D N A V N D | F T T R S Q S V V G |      | MUC5AC_C_lupus      |
| 1007 | - - G L L L L W D K K T S I F I R L | S P E F K G R V C G L C G N F D   | D N A V N D | F T T R S Q S V V G |      | MUC5AC_E_caballus   |
| 1008 | - - G L V L L W D K K T S I F L R L | S P E F K G R V C G L C G N F D   | D N A I N D | F T T R S Q S V V S |      | MUC5AC_M_musculus   |
| 1008 | - - G L V L L W D K K T S I F L R L | S P E F K G K V C G L C G N F D   | D N A I N D | F T T R S Q S V V S |      | MUC5AC_R_norvegicus |
| 999  | - - G M A V S W D R K T S V F I R L | H Q D Y K G R V C G L C G N F D   | D N A I N D | F A T R S R S V V G |      | MUC5B_H_sapiens     |
| 1001 | - - G V L L S W D R K T S V F I R L | R Q D Y K G R V C G L C G N F D   | D K G V N D | F T T R S Q S V V G |      | MUC5B_C_lupus       |
| 1005 | - - G I V V S W D R K T S V F V R L | Q Q H Y K G R V C G L C G N F D   | D N A I N D | F T T R S Q S V V G |      | MUC5B_M_musculus    |
| 1005 | - - G I V V S W D R K T S V F V R L | Q Q H Y K G R V C G L C G N F D   | D N A I N D | F T T R S Q S V V G |      | MUC5B_R_norvegicus  |
| 973  | R Y N L T L I W N R H M T I L I R I | A R A S Q D P L C G L C G N F N   | G N M K D D | F E T R S R Y V A S |      | MUC6_H_sapiens      |
| 975  | R Y N L T L V W N K H M T I F I K I | T R A T Q D A L C G L C G N Y N   | G N M K D D | F E T R S N Y V A S |      | MUC6_C_lupus        |
| 974  | R L N L T L V W N K H M S V S I K I | R R A T Q D A L C G L C G N A N   | G N M K D D | F E T R S K Y V A S |      | MUC6_M_musculus     |
| 973  | R L N L T L M W N K H M S V S M K I | R R E T Q D P L C G L C G N S N   | G N M K D D | F E T R S K Y V A S |      | MUC6_R_norvegicus   |
| 934  | K Y N M T L I W N K H M N F F I K I | S R E T Q E T I C G L C G N Y N   | G N M K D D | F E T R S K Y V A S |      | MUC6_G_gallus       |
| 1512 | - - G I I V I W D K N T R L S V I L | D P N W N G K V C G L C G N N N   | G D L K D D | F T T R Y S S V A S |      | MUC19_H_sapiens     |
| 1016 | - - G I T I I W D K N T R V S A I L | D P R W H G K V C G L C G N N N   | G D L K D D | F I T R H S T E A I |      | MUC19_C_lupus       |
| 1251 | - - G I T I I W D K N T R I S V I L | D P R W N G Q V C G L C G N N N   | G D L K D D | F T T R Y S S V A A |      | MUC19_B_taurus      |
| 1034 | - - G I T I I W D K N T R I S V I L | D P R W N G K V C G L C G N N N   | G D L K D D | F T T R Y S S V A V |      | MUC19_S_scrofa      |
| 962  | - - G I I L I W D K Y T K V S V I L | D P S W Q N K V C G L C G N N N   | G D L K D D | F T T R H S S V A A |      | MUC19_M_musculus    |
| 962  | - - G I I L I W D K Y T K V S V I L | D P S W Q N K V C G L C G N N N   | G D L K D D | F T T R H S S V A A |      | MUC19_R_norvegicus  |
| 1078 | - - G I T V L W D G S T R V S T I L | D P E L R G K V C G L C G N N N   | G D L K D D | F M A R D G S V A F |      | FIMB1_X_laewis      |

. . . . . S W K . . . . C . D . . . . . C . . . . . C . . . . . All Match Human VWF  
 . . . . F G N S W K . S . . C . D . . . . . C . N . . . . . C . I . . S . Majority Match Human VWF  
 S E L E F G N S W K E S P S C P D A S A P - - - - X D P C S L N P Y R K S W A E K X C S I I N S X Majority

|      | 1060 |   |   |   |   |   |   |   |   |   | 1070 |   |   |   |   |   |   |   |   |   | 1080 |   |   |   |   |   |   |   |   |   | 1090 |   |   |   |   |   |   |   |   |   | 1100 |   |   |   |   |   |   |   |   |                    |                     |
|------|------|---|---|---|---|---|---|---|---|---|------|---|---|---|---|---|---|---|---|---|------|---|---|---|---|---|---|---|---|---|------|---|---|---|---|---|---|---|---|---|------|---|---|---|---|---|---|---|---|--------------------|---------------------|
| 1017 | D    | P | V | D | F | G | N | S | W | K | V    | S | S | Q | C | A | D | T | R | K | V    | P | L | D | S | S | P | A | T | C | H    | N | N | I | M | K | Q | T | M | V | D    | S | S | C | R | I | L | T | S | D                  | VWF_H_sapiens       |
| 1013 | S    | E | L | D | F | G | N | S | W | K | E    | A | P | T | C | P | D | V | S | T | N    | - | - | - | - | - | P | E | P | C | S    | L | N | P | H | R | R | S | W | A | E    | K | Q | C | S | I | L | K | S | S                  | MUC2_H_sapiens      |
| 1013 | S    | E | L | D | F | G | N | S | W | K | E    | A | P | T | C | P | D | V | S | T | -    | - | - | - | - | P | E | P | C | V | L    | R | P | H | R | L | A | W | A | E | K    | Q | C | S | I | I | K | S | S | MUC2_C_lupus       |                     |
| 1013 | S    | E | L | D | F | G | N | S | W | K | E    | A | P | T | C | P | D | V | S | A | T    | - | - | - | - | - | P | E | P | C | T    | L | N | P | H | R | R | S | W | A | E    | K | Q | C | S | I | I | K | S | P                  | MUC2_E_caballus     |
| 1011 | S    | E | L | D | F | G | N | S | W | K | E    | A | S | T | C | P | D | V | S | H | N    | - | - | - | - | - | P | D | P | C | S    | L | N | P | H | R | R | S | W | A | E    | K | Q | C | S | I | I | K | S | R                  | MUC2_M_musculus     |
| 1010 | S    | E | L | D | F | G | N | S | W | K | E    | A | S | T | C | P | D | V | S | H | N    | - | - | - | - | - | P | D | P | C | S    | L | N | P | H | R | R | S | W | A | E    | K | Q | C | S | I | I | K | S | D                  | MUC2_R_norvegicus   |
| 1010 | N    | A | L | T | F | G | N | S | W | K | Q    | S | S | V | C | P | D | V | T | E | E    | - | - | - | - | - | I | K | P | C | D    | L | K | P | H | R | K | S | W | A | E    | K | E | C | S | L | I | L | S | E                  | MUC2_G_gallus       |
| 1057 | D    | V | L | E | F | G | N | S | W | K | L    | S | P | S | C | P | D | A | L | A | P    | - | - | - | - | - | K | D | P | C | T    | A | N | P | F | R | K | S | W | A | Q    | K | Q | C | S | I | L | H | G | P                  | MUC5AC_H_sapiens    |
| 1052 | S    | T | L | E | F | G | N | S | W | K | F    | S | P | S | C | P | D | A | P | A | P    | - | - | - | - | - | R | D | P | C | T    | A | N | P | Y | R | K | S | W | S | Q    | K | Q | C | S | I | I | N | S | A                  | MUC5AC_C_lupus      |
| 1055 | N    | A | L | E | F | G | N | S | W | K | F    | S | P | S | C | P | D | A | P | A | P    | - | - | - | - | - | K | D | P | C | S    | A | N | P | Y | R | K | S | W | A | Q    | K | Q | C | S | I | I | N | S | A                  | MUC5AC_E_caballus   |
| 1056 | D    | M | L | E | F | G | N | S | W | K | L    | S | P | S | C | P | D | V | L | V | P    | - | - | - | - | - | K | D | P | C | T    | A | N | P | Y | R | K | S | W | A | Q    | K | Q | C | S | I | I | N | S | E                  | MUC5AC_M_musculus   |
| 1056 | D    | M | L | E | F | G | N | S | W | K | L    | S | P | S | C | P | D | A | S | V | S    | - | - | - | - | - | K | D | P | C | T    | A | N | P | Y | R | K | S | W | A | Q    | K | Q | C | S | I | I | N | S | A                  | MUC5AC_R_norvegicus |
| 1047 | D    | A | L | E | F | G | N | S | W | K | L    | S | P | S | C | P | D | A | L | A | P    | - | - | - | - | - | K | D | P | C | T    | A | N | P | F | R | K | S | W | A | Q    | K | Q | C | S | I | L | H | G | P                  | MUC5B_H_sapiens     |
| 1049 | S    | A | L | E | F | G | N | S | W | K | F    | S | P | S | C | P | D | A | P | A | P    | - | - | - | - | - | R | D | P | C | T    | A | N | P | Y | R | K | S | W | S | Q    | K | Q | C | S | I | I | N | S | A                  | MUC5B_C_lupus       |
| 1053 | D    | V | L | E | F | G | N | S | W | K | F    | S | P | S | C | P | D | A | P | V | P    | - | - | - | - | - | K | D | P | C | I    | A | N | P | Y | R | K | S | W | A | Q    | K | K | C | S | I | I | N | S | A                  | MUC5B_M_musculus    |
| 1053 | D    | V | L | E | F | G | N | S | W | K | F    | S | P | S | C | P | D | A | P | V | P    | - | - | - | - | - | K | D | P | C | I    | A | N | P | Y | R | K | S | W | A | Q    | K | K | C | S | I | I | N | S | A                  | MUC5B_R_norvegicus  |
| 1023 | S    | E | L | E | L | V | N | S | W | K | E    | S | P | L | C | G | D | V | S | F | V    | - | - | - | - | - | T | D | P | C | S    | L | N | A | F | R | R | S | W | A | E    | R | K | C | S | V | I | N | S | Q                  | MUC6_H_sapiens      |
| 1025 | S    | E | L | E | F | V | N | S | W | K | D    | S | P | L | C | G | D | T | S | L | A    | - | - | - | - | - | L | D | P | C | S    | L | N | T | F | R | R | A | W | A | E    | R | K | C | G | I | I | N | S | P                  | MUC6_C_lupus        |
| 1024 | N    | E | L | E | F | V | N | S | W | K | E    | S | P | L | C | G | D | A | S | Y | A    | - | - | - | - | - | V | D | P | C | S    | L | N | T | F | R | R | S | W | A | E    | R | K | C | N | I | I | N | S | Q                  | MUC6_M_musculus     |
| 1023 | N    | E | L | E | F | V | N | S | W | K | E    | S | P | L | C | G | D | A | S | Y | A    | - | - | - | - | - | V | D | P | C | S    | L | N | T | F | R | R | S | W | A | E    | R | K | C | N | I | I | N | S | Q                  | MUC6_R_norvegicus   |
| 984  | N    | E | L | E | F | V | N | S | W | K | E    | N | P | L | C | G | D | V | Y | F | V    | - | - | - | - | - | V | D | P | C | S    | K | N | P | Y | R | K | A | W | A | E    | K | T | C | S | I | I | N | S | Q                  | MUC6_G_gallus       |
| 1560 | G    | A | L | E | F | G | N | S | W | K | T    | S | Q | E | C | S | D | T | V | A | Q    | T | - | - | - | - | F | P | C | D | S    | N | P | Y | C | K | A | W | A | V | R    | K | C | E | I | L | R | D | S | MUC19_H_sapiens    |                     |
| 1064 | G    | A | L | E | F | G | N | S | W | K | T    | S | Q | K | C | S | D | T | L | Q | Q    | N | - | - | - | - | F | P | C | D | S    | N | P | Y | C | K | T | W | A | V | Q    | K | C | E | I | I | R | D | S | MUC19_C_lupus      |                     |
| 1299 | G    | T | L | E | F | G | N | S | W | K | T    | S | Q | E | C | S | D | T | V | A | Q    | T | - | - | - | - | F | P | C | D | S    | N | P | Y | C | K | A | W | A | V | R    | K | C | E | I | I | R | D | S | MUC19_B_taurus     |                     |
| 1082 | G    | E | L | E | F | G | N | S | W | K | T    | S | Q | E | C | S | D | T | V | T | Q    | S | - | - | - | - | F | P | C | D | S    | N | P | Y | C | K | A | W | A | V | R    | K | C | E | I | I | R | D | S | MUC19_S_scrofa     |                     |
| 1010 | G    | A | L | E | F | A | N | S | W | K | T    | S | Q | E | C | S | D | T | V | T | Q    | S | - | - | - | - | F | P | C | D | S    | N | P | Y | C | K | A | W | A | E | K    | R | C | E | I | L | R | D | D | MUC19_M_musculus   |                     |
| 1010 | G    | A | L | E | F | A | N | S | W | K | T    | S | Q | E | C | S | D | T | V | T | Q    | S | - | - | - | - | F | P | C | D | S    | N | P | Y | C | K | A | W | A | E | K    | K | C | E | I | I | R | D | D | MUC19_R_norvegicus |                     |
| 1126 | E    | I | V | K | F | A | K | S | W | K | T    | D | P | S | C | R | D | S | E | V | Q    | I | - | - | - | - | Y | P | C | D | L    | N | G | Y | C | K | P | W | A | L | R    | K | C | Q | F | I | K | E | D | FIMB1_X_laewis     |                     |



. F . . C . . . V . . . . . C . . . . C . C . . . G . . . . C . . . A . Y A . . C . . . . All Match Human VWF  
 . F . . C . . . V D P . . Y . . . C . . D . C . C . . . G D C . C F C . . . A A Y A . . C . . . G . Majority Match Human VWF  
 T F A A C H S K V D P T P Y Y E A C V H D A C A C D S G G D C E C F C T A V A A Y A Q A C X D V G V Majority

|      | 1110 |   |   |   |   | 1120 |   |   |   |   | 1130 |   |   |   |   | 1140 |   |   |   |   | 1150 |   |   |   |   |   |   |   |   |   |   |   |   |   |   |   |   |   |   |   |   |   |   |   |   |   |   |   |   |   |                     |
|------|------|---|---|---|---|------|---|---|---|---|------|---|---|---|---|------|---|---|---|---|------|---|---|---|---|---|---|---|---|---|---|---|---|---|---|---|---|---|---|---|---|---|---|---|---|---|---|---|---|---|---------------------|
| 1067 | V    | F | Q | D | C | N    | K | L | V | D | P    | E | P | Y | L | D    | V | C | I | Y | D    | T | C | S | C | E | S | I | G | D | C | A | C | F | C | D | T | I | A | A | Y | A | H | V | C | A | Q | H | G | K | VWF_H_sapiens       |
| 1058 | V    | F | S | I | C | H    | S | K | V | D | P    | K | P | F | Y | E    | A | C | V | H | D    | S | C | S | C | D | T | G | G | D | C | E | C | F | C | S | A | V | A | S | Y | A | Q | E | C | T | K | E | G | A | MUC2_H_sapiens      |
| 1058 | V    | F | S | S | C | H    | S | K | V | D | P    | K | P | F | Y | E    | A | C | V | H | D    | S | C | S | C | D | S | G | G | D | C | E | C | F | C | S | A | V | A | S | Y | A | Q | E | C | T | K | E | G | A | MUC2_C_lupus        |
| 1058 | V    | F | S | A | C | H    | S | K | V | D | P    | T | P | F | Y | E    | A | C | V | Y | D    | S | C | S | C | D | S | G | G | D | C | E | C | F | C | S | A | V | A | T | Y | A | Q | E | C | T | K | E | G | A | MUC2_E_caballus     |
| 1056 | V    | F | K | V | C | H    | S | K | V | D | P    | T | V | F | Y | E    | A | C | V | H | D    | S | C | S | C | D | T | G | G | D | C | D | C | F | C | S | A | V | A | S | Y | A | Q | E | C | T | K | A | E | A | MUC2_M_musculus     |
| 1055 | V    | F | L | A | C | H    | G | K | V | D | P    | T | V | F | Y | D    | A | C | V | H | D    | S | C | S | C | D | T | G | G | D | C | E | C | F | C | S | A | V | A | S | Y | A | Q | E | C | T | K | A | E | A | MUC2_R_norvegicus   |
| 1055 | I    | F | K | I | C | H    | S | K | V | N | P    | S | P | F | Y | D    | A | C | V | H | D    | A | C | S | C | D | S | G | G | D | C | D | C | F | C | S | A | V | A | A | Y | A | Q | E | C | T | K | A | Q | A | MUC2_G_gallus       |
| 1102 | T    | F | A | A | C | H    | A | H | V | E | P    | A | R | Y | Y | E    | A | C | V | N | D    | A | C | A | C | D | S | G | G | D | C | E | C | F | C | T | A | V | A | A | Y | A | Q | A | C | H | E | V | G | L | MUC5AC_H_sapiens    |
| 1097 | T    | F | A | A | C | H    | A | H | V | E | P    | A | K | Y | Y | E    | A | C | V | G | D    | A | C | A | C | D | S | G | G | D | C | E | C | F | C | T | A | V | A | A | Y | A | Q | A | C | H | D | V | G | V | MUC5AC_C_lupus      |
| 1100 | T    | F | A | T | C | H    | A | H | V | E | P    | A | K | Y | Y | E    | A | C | V | S | D    | A | C | A | C | D | S | G | G | D | C | E | C | F | C | T | A | V | A | A | Y | A | Q | A | C | H | E | V | G | V | MUC5AC_E_caballus   |
| 1101 | T    | F | S | A | C | H    | A | H | V | E | P    | A | K | Y | Y | E    | A | C | V | N | D    | A | C | A | C | D | S | G | G | D | C | E | C | F | C | T | A | V | A | A | Y | A | Q | A | C | H | E | V | G | V | MUC5AC_M_musculus   |
| 1101 | A    | F | S | A | C | H    | A | H | V | E | P    | A | K | Y | Y | E    | A | C | V | N | D    | A | C | A | C | D | S | G | G | D | C | E | C | F | C | T | A | V | A | A | Y | A | Q | A | C | H | E | V | G | V | MUC5AC_R_norvegicus |
| 1092 | T    | F | A | A | C | R    | S | Q | V | D | S    | T | K | Y | Y | E    | A | C | V | N | D    | A | C | A | C | D | S | G | G | D | C | E | C | F | C | T | A | V | A | A | Y | A | Q | A | C | H | D | A | G | L | MUC5B_H_sapiens     |
| 1094 | T    | F | A | A | C | H    | S | Q | V | D | P    | T | K | Y | Y | E    | A | C | V | G | D    | A | C | A | C | D | L | G | G | D | C | E | C | L | C | T | A | V | A | A | Y | A | Q | A | C | R | D | V | G | V | MUC5B_C_lupus       |
| 1098 | T    | F | A | A | C | H    | S | Q | V | D | S    | T | K | Y | Y | E    | A | C | V | H | D    | V | C | A | C | D | S | G | G | D | C | E | C | F | C | T | A | V | A | A | Y | A | Q | A | C | R | D | V | G | V | MUC5B_M_musculus    |
| 1098 | T    | F | A | A | C | H    | S | Q | V | D | S    | T | K | Y | Y | E    | A | C | V | H | D    | V | C | A | C | D | S | G | G | D | C | E | C | F | C | T | A | V | A | A | Y | A | Q | A | C | R | D | V | G | V | MUC5B_R_norvegicus  |
| 1068 | T    | F | A | T | C | H    | S | K | V | Y | H    | L | P | Y | Y | E    | A | C | V | R | D    | A | C | G | C | D | S | G | G | D | C | E | C | L | C | D | A | V | A | A | Y | A | Q | A | C | L | D | K | G | V | MUC6_H_sapiens      |
| 1070 | T    | F | A | A | C | H    | S | Q | V | Y | H    | L | P | Y | Y | E    | A | C | V | Q | D    | A | C | G | C | D | T | T | G | D | C | E | C | L | C | D | A | V | A | A | Y | A | K | A | C | L | D | K | G | V | MUC6_C_lupus        |
| 1069 | T    | F | A | A | C | H    | S | K | V | Y | H    | L | P | Y | Y | E    | A | C | V | R | D    | A | C | G | C | D | T | G | G | D | C | E | C | L | C | D | A | V | A | A | Y | A | K | A | C | L | D | K | G | V | MUC6_M_musculus     |
| 1068 | T    | F | A | A | C | H    | S | K | V | Y | H    | L | P | Y | Y | E    | A | C | V | H | D    | A | C | G | C | D | T | G | G | D | C | E | C | L | C | D | A | V | A | A | Y | A | K | A | C | L | D | K | G | V | MUC6_R_norvegicus   |
| 1029 | V    | F | S | A | C | H    | N | K | V | N | R    | M | P | Y | Y | E    | A | C | V | R | D    | S | C | G | C | D | I | G | G | D | C | E | C | M | C | D | A | I | A | V | Y | A | M | A | C | L | D | K | G | I | MUC6_G_gallus       |
| 1605 | T    | F | R | D | C | H    | N | K | V | D | P    | S | A | Y | H | D    | V | C | I | E | E    | A | C | A | C | D | M | E | G | K | Y | L | G | F | C | T | A | V | A | M | Y | A | E | A | C | S | A | V | G | V | MUC19_H_sapiens     |
| 1109 | I    | F | K | E | C | H    | H | K | V | D | P    | E | A | Y | L | E    | A | C | I | E | E    | A | C | A | C | D | T | Q | G | K | Y | L | G | F | C | T | A | V | A | M | Y | A | E | A | C | S | A | V | G | V | MUC19_C_lupus       |
| 1344 | T    | F | R | E | C | H    | N | K | V | D | P    | N | E | Y | Y | D    | A | C | I | E | E    | A | C | A | C | D | M | E | G | K | Y | L | G | F | C | T | A | V | A | M | Y | A | E | A | C | S | A | V | G | V | MUC19_B_taurus      |
| 1127 | T    | F | R | D | C | H    | N | K | V | D | P    | S | A | Y | Y | D    | A | C | I | E | E    | A | C | A | C | D | M | E | G | K | Y | L | G | F | C | T | A | V | A | M | Y | A | E | A | C | S | A | V | G | V | MUC19_S_scrofa      |
| 1055 | T    | F | R | D | C | H    | S | K | V | D | P    | T | T | Y | Y | D    | A | C | I | E | E    | A | C | S | C | D | M | E | G | K | Y | L | G | F | C | T | A | V | A | M | Y | A | E | A | C | N | A | A | G | V | MUC19_M_musculus    |
| 1055 | T    | F | R | D | C | H    | S | K | V | D | P    | T | T | Y | Y | N    | A | C | I | E | E    | A | C | S | C | D | M | E | G | K | Y | L | G | F | C | T | A | V | A | M | Y | A | E | A | C | N | A | A | G | V | MUC19_R_norvegicus  |
| 1171 | T    | F | K | A | C | H    | K | K | V | D | P    | T | P | Y | Y | D    | A | C | V | R | E    | A | C | V | C | D | L | E | G | K | Y | L | G | F | C | T | N | V | A | M | Y | A | E | A | C | R | R | A | D | V | FIMB1_X_laewis      |





. . . . . E G C . . . . C . . . . . C . . . . . All Match Human VWF  
 T C . . . . . E G C . . . . C P . . . . D E . . . . C V . . . . C . . . . Majority Match Human VWF  
 T C R N P X G - X C L S - - S G L E G C Y P K C P P S A P Y F D E D T M K C V A L C E C S - - - - Majority

|      | 1210 |   |   |   |   |   |   |   |   |   | 1220 |   |   |   |   |   |   |   |   |   | 1230 |   |   |   |   |   |   |   |   |   | 1240 |   |   |   |   |   |   |   |   |   | 1250 |   |   |   |   |   |   |                   |   |                |                     |
|------|------|---|---|---|---|---|---|---|---|---|------|---|---|---|---|---|---|---|---|---|------|---|---|---|---|---|---|---|---|---|------|---|---|---|---|---|---|---|---|---|------|---|---|---|---|---|---|-------------------|---|----------------|---------------------|
| 1156 | T    | C | Q | H | P | E | P | L | A | C | P    | - | - | V | Q | C | V | E | G | C | H    | A | H | C | P | P | G | K | - | I | L    | D | E | L | L | Q | T | C | V | D | P    | E | D | C | P | V | C | E                 | V | A              | VWF_H_sapiens       |
| 1144 | T    | C | R | T | I | N | G | I | H | S | N    | I | S | V | S | Y | L | E | G | C | Y    | P | R | C | P | K | D | R | P | I | Y    | E | E | D | L | K | K | C | V | T | A    | D | K | C | G | - | - | -                 | - | -              | MUC2_H_sapiens      |
| 1144 | T    | C | R | T | I | N | G | I | H | S | N    | I | S | V | S | Y | L | E | G | C | Y    | P | R | C | P | K | D | R | P | I | Y    | D | E | D | L | K | K | C | V | T | A    | D | K | C | G | - | - | -                 | - | -              | MUC2_C_lupus        |
| 1144 | T    | C | R | T | I | N | G | I | H | S | N    | I | S | M | S | Y | L | E | G | C | Y    | P | R | C | P | K | H | R | P | I | Y    | D | E | D | L | K | K | C | V | R | R    | D | Q | C | G | - | - | -                 | - | -              | MUC2_E_caballus     |
| 1142 | T    | C | R | T | L | N | G | I | H | S | N    | I | S | V | S | Y | L | E | G | C | Y    | P | R | C | P | E | D | R | P | I | Y    | D | E | D | L | K | K | C | V | T | G    | D | K | C | G | - | - | -                 | - | -              | MUC2_M_musculus     |
| 1141 | T    | C | R | T | L | N | G | I | H | S | N    | I | S | V | S | Y | L | E | G | C | Y    | P | R | C | P | E | D | R | P | I | Y    | D | E | D | L | K | K | C | V | S | G    | D | K | C | G | - | - | -                 | - | -              | MUC2_R_norvegicus   |
| 1140 | T    | C | R | M | L | Y | N | V | S | T | N    | F | S | V | P | Y | L | E | G | C | Y    | P | R | C | P | H | E | K | P | V | Y    | N | E | E | T | K | E | C | V | A | A    | D | E | C | W | - | - | -                 | - | -              | MUC2_G_gallus       |
| 1188 | T    | C | R | N | P | R | G | - | D | C | L    | R | D | V | W | G | L | E | G | C | Y    | P | K | C | P | P | E | A | P | I | F    | D | E | D | K | M | Q | C | V | A | T    | C | P | T | P | P | L | P                 | P | R              | MUC5AC_H_sapiens    |
| 1183 | T    | C | R | N | P | S | G | - | R | C | L    | H | D | L | H | G | L | E | G | C | Y    | P | K | C | P | P | E | A | P | I | F    | D | E | D | Q | M | Q | C | V | A | T    | C | P | T | P | P | P | L                 | P | MUC5AC_C_lupus |                     |
| 1186 | T    | C | Q | N | P | S | G | - | Q | C | L    | H | D | V | R | G | L | E | G | C | Y    | P | K | C | P | A | E | A | P | L | F    | D | E | D | Q | M | Q | C | V | A | T    | C | P | Q | S | P | - | -                 | - | -              | MUC5AC_E_caballus   |
| 1187 | T    | C | Q | N | P | T | G | - | Q | C | L    | Q | D | L | R | G | L | E | G | C | Y    | P | K | C | P | P | T | A | P | I | F    | D | E | G | T | M | Q | C | V | S | N    | C | T | V | T | - | - | -                 | F | P              | MUC5AC_M_musculus   |
| 1187 | T    | C | Q | N | P | T | G | - | Q | C | L    | Q | D | L | R | G | L | E | G | C | Y    | P | K | C | P | P | T | A | P | I | F    | D | E | G | T | M | Q | C | V | S | N    | C | T | V | S | P | - | -                 | S | P              | MUC5AC_R_norvegicus |
| 1178 | T    | C | R | N | P | S | G | - | H | C | L    | V | D | L | P | G | L | E | G | C | Y    | P | K | C | P | P | S | Q | P | F | F    | N | E | D | Q | M | K | C | V | A | Q    | C | G | C | Y | D | - | -                 | - | -              | MUC5B_H_sapiens     |
| 1180 | T    | C | R | N | P | S | G | - | H | C | Q    | M | D | L | P | G | L | E | G | C | Y    | P | R | C | P | P | S | E | P | F | F    | S | E | D | Q | M | K | C | V | A | Q    | C | G | C | Y | D | - | -                 | - | -              | MUC5B_C_lupus       |
| 1184 | T    | C | R | N | P | T | G | - | H | C | L    | V | D | L | P | G | L | E | G | C | Y    | P | Q | C | P | T | S | Q | P | F | F    | N | E | D | Q | M | K | C | V | A | Q    | C | G | C | Y | D | - | -                 | - | -              | MUC5B_M_musculus    |
| 1184 | T    | C | R | N | P | S | G | - | H | C | L    | V | D | L | P | G | L | E | G | C | Y    | P | Q | C | P | P | S | Q | P | F | F    | N | E | D | Q | M | K | C | V | A | Q    | C | G | C | Y | D | - | -                 | - | -              | MUC5B_R_norvegicus  |
| 1167 | Q    | S | V | P | G | S | N | - | - | - | -    | - | - | - | - | - | - | I | E | G | C    | Y | N | - | C | S | Q | D | E | - | Y    | F | D | H | E | E | G | V | C | V | P    | C | - | - | - | - | - | MUC6_H_sapiens    |   |                |                     |
| 1168 | Q    | S | L | P | H | T | N | - | - | - | -    | - | - | - | - | - | - | T | E | G | C    | Y | N | - | C | S | Q | H | E | - | Y    | F | D | Q | N | T | G | T | C | V | P    | C | - | - | - | - | - | MUC6_C_lupus      |   |                |                     |
| 1168 | G    | S | F | P | D | T | N | - | - | - | -    | - | - | - | - | - | - | T | E | G | C    | Y | N | - | C | S | Q | N | E | - | Y    | F | D | H | S | E | G | T | C | V | P    | C | - | - | - | - | - | MUC6_M_musculus   |   |                |                     |
| 1166 | G    | S | F | P | D | T | N | - | - | - | -    | - | - | - | - | - | - | T | E | G | C    | Y | N | - | C | S | Q | N | E | - | Y    | F | D | H | K | E | G | T | C | V | P    | C | - | - | - | - | - | MUC6_R_norvegicus |   |                |                     |
| 1127 | Q    | Y | Y | K | Y | V | N | - | - | - | -    | - | - | - | - | - | - | I | E | G | C    | Y | N | - | C | S | H | D | E | - | Y    | F | D | Y | E | K | E | K | C | M | P    | C | - | - | - | - | - | MUC6_G_gallus     |   |                |                     |
| 1691 | T    | C | K | D | Q | L | V | G | Q | K | F    | S | - | - | S | L | L | E | G | C | Y    | A | K | C | P | D | S | A | P | Y | L    | D | E | N | T | M | K | C | V | S | L    | S | E | C | S | - | - | -                 | - | -              | MUC19_H_sapiens     |
| 1195 | T    | C | R | D | K | V | I | G | Q | K | F    | S | - | - | A | V | L | E | G | C | Y    | A | K | C | P | D | N | A | P | Y | L    | D | E | N | L | M | K | C | V | T | L    | S | E | C | S | - | - | -                 | - | -              | MUC19_C_lupus       |
| 1430 | T    | C | K | D | R | V | I | G | Q | K | F    | S | - | - | A | L | L | E | G | C | Y    | A | K | C | P | D | S | A | P | Y | L    | D | E | N | T | M | K | C | V | S | L    | A | E | C | S | - | - | -                 | - | -              | MUC19_B_taurus      |
| 1213 | T    | C | K | D | R | V | I | G | Q | K | F    | S | - | - | A | L | L | E | G | C | Y    | A | K | C | P | D | S | A | P | Y | L    | D | E | N | T | M | K | C | V | S | L    | S | E | C | S | - | - | -                 | - | -              | MUC19_S_scrofa      |
| 1141 | T    | C | K | D | Q | V | I | G | Q | K | F    | S | - | - | S | L | L | E | G | C | Y    | A | K | C | P | E | N | A | P | Y | L    | D | E | N | T | M | K | C | V | Q | L    | S | E | C | S | - | - | -                 | - | -              | MUC19_M_musculus    |
| 1141 | T    | C | K | D | Q | V | I | G | Q | K | F    | S | - | - | S | L | L | E | G | C | Y    | A | K | C | P | E | N | A | P | Y | L    | D | E | N | T | M | K | C | V | Q | L    | S | E | C | S | - | - | -                 | - | -              | MUC19_R_norvegicus  |
| 1257 | T    | C | H | N | Q | A | M | S | S | N | F    | S | - | - | K | Y | L | E | G | C | Y    | A | K | C | S | G | K | A | A | Y | L    | D | E | N | F | M | K | C | V | P | L    | S | K | C | S | - | - | -                 | - | -              | FIMB1_X_laewis      |

. . . . .  
 . . . . . C . . C . C  
 X C X Y G X D Y I P G G X V P T D E N C Q S C X C -

1260

1270

|      |   |   |   |   |   |   |   |   |   |   |   |   |   |   |   |   |   |   |   |   |   |   |   |   |   |
|------|---|---|---|---|---|---|---|---|---|---|---|---|---|---|---|---|---|---|---|---|---|---|---|---|---|
| 1203 | G | R | R | F | A | S | G | K | K | V | T | L | N | P | S | D | P | E | H | C | Q | I | C | H | C |
| 1189 | C | Y | V | E | D | T | H | Y | P | P | G | A | S | V | P | T | E | E | T | C | K | S | C | V | C |
| 1189 | C | Y | V | G | D | T | H | Y | P | P | G | A | S | V | P | A | E | K | D | C | H | S | C | V | C |
| 1189 | C | Y | I | E | D | T | H | Y | P | P | G | A | S | V | P | T | D | D | I | C | Q | S | C | M | C |
| 1187 | C | Y | I | E | D | T | R | Y | P | P | G | G | S | V | P | T | D | E | I | C | K | S | C | T | C |
| 1186 | C | Y | I | E | D | T | R | Y | P | P | G | G | S | V | P | T | D | E | I | C | M | S | C | T | C |
| 1185 | C | Y | H | N | G | K | P | V | I | I | G | G | E | I | P | T | E | E | N | C | T | K | C | I | C |
| 1237 | C | H | V | H | G | K | S | Y | R | P | G | A | V | V | P | S | D | K | N | C | Q | S | C | L | C |
| 1232 | C | R | V | Q | G | K | S | Y | W | P | G | S | A | V | P | S | E | E | N | C | Q | S | C | V | C |
| 1231 | C | R | I | Q | G | K | S | Y | Q | P | G | T | P | V | P | S | D | E | N | C | H | S | C | V | C |
| 1233 | C | R | V | N | G | K | L | Y | R | P | G | A | S | V | P | S | D | K | N | C | D | S | C | I | C |
| 1234 | C | R | V | N | G | K | L | Y | R | P | G | T | P | I | P | S | D | E | N | C | Y | S | C | V | C |
| 1223 | - | - | K | D | G | N | Y | D | V | G | A | R | V | P | T | A | E | N | C | Q | S | C | N | C |   |
| 1225 | - | - | E | D | G | N | Y | H | D | V | G | A | R | V | P | A | A | E | N | C | Q | S | C | E | C |
| 1229 | - | - | D | N | G | N | Y | H | D | I | G | T | Q | V | P | T | A | E | N | C | Q | S | C | L | C |
| 1229 | - | - | D | D | G | N | Y | H | D | I | G | T | Q | V | P | T | A | E | N | C | Q | S | C | L | C |
| 1196 |   |   |   |   |   |   |   |   |   |   |   |   |   |   |   |   |   |   |   |   |   |   |   |   |   |
| 1197 |   |   |   |   |   |   |   |   |   |   |   |   |   |   |   |   |   |   |   |   |   |   |   |   |   |
| 1197 |   |   |   |   |   |   |   |   |   |   |   |   |   |   |   |   |   |   |   |   |   |   |   |   |   |
| 1195 |   |   |   |   |   |   |   |   |   |   |   |   |   |   |   |   |   |   |   |   |   |   |   |   |   |
| 1156 |   |   |   |   |   |   |   |   |   |   |   |   |   |   |   |   |   |   |   |   |   |   |   |   |   |
| 1734 | - | C | F | Y | N | - | D | V | I | P | A | G | G | V | I | E | D | N | C | G | R | T | C | Y | C |
| 1238 | - | C | F | Y | N | - | D | I | I | P | A | G | G | V | I | Q | D | N | C | G | R | T | C | Y | C |
| 1473 | - | C | F | Y | N | - | D | I | V | P | A | G | G | V | I | Q | D | N | C | G | R | T | C | Y | C |
| 1256 | - | C | F | Y | N | - | D | I | I | P | A | G | G | V | I | Q | D | N | C | G | R | I | C | Y | C |
| 1184 | - | C | F | Y | N | - | D | V | I | P | A | G | G | A | V | V | D | D | C | G | R | T | C | S | C |
| 1184 | - | C | F | Y | N | - | D | V | I | P | A | G | G | A | V | V | D | D | C | G | R | T | C | S | C |
| 1300 | - | C | L | Y | N | G | R | V | I | P | A | N | Q | A | I | T | D | E | C | G | K | K | C | H | C |

All Match Human VWF  
 Majority Match Human VWF  
 Majority

VWF\_H\_sapiens  
 MUC2\_H\_sapiens  
 MUC2\_C\_lupus  
 MUC2\_E\_caballus  
 MUC2\_M\_musculus  
 MUC2\_R\_norvegicus  
 MUC2\_G\_gallus  
 MUC5AC\_H\_sapiens  
 MUC5AC\_C\_lupus  
 MUC5AC\_E\_caballus  
 MUC5AC\_M\_musculus  
 MUC5AC\_R\_norvegicus  
 MUC5B\_H\_sapiens  
 MUC5B\_C\_lupus  
 MUC5B\_M\_musculus  
 MUC5B\_R\_norvegicus  
 MUC6\_H\_sapiens  
 MUC6\_C\_lupus  
 MUC6\_M\_musculus  
 MUC6\_R\_norvegicus  
 MUC6\_G\_gallus  
 MUC19\_H\_sapiens  
 MUC19\_C\_lupus  
 MUC19\_B\_taurus  
 MUC19\_S\_scrofa  
 MUC19\_M\_musculus  
 MUC19\_R\_norvegicus  
 FIMB1\_X\_laavis

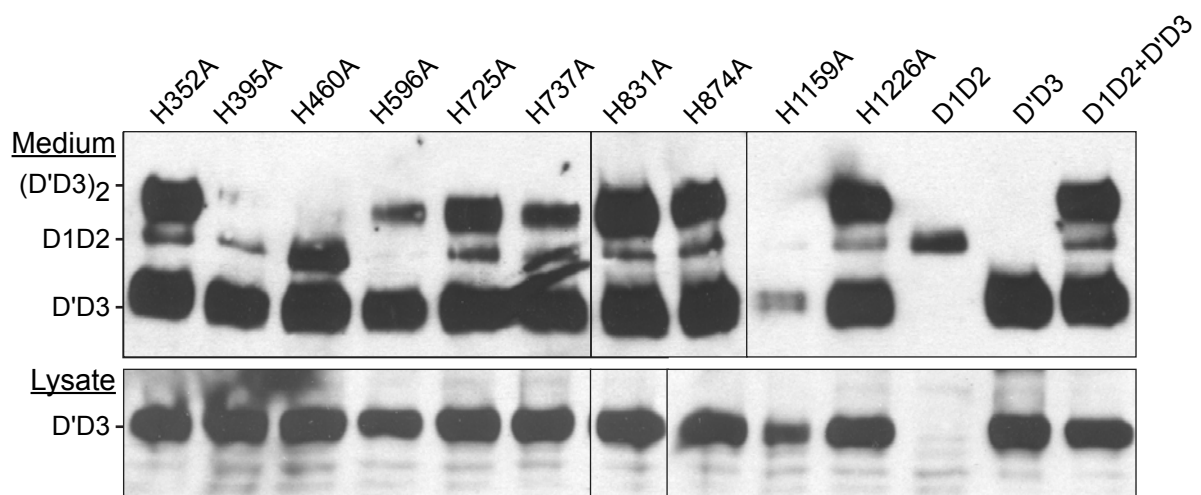

Dang et al  
Figure S5
